# Supplementary material for: Seleno-Warfare against Cancer: Decoding Antitumor Activity of Novel Acylselenoureas and Se-Acylisoselenoureas
Source: MDPI journal article supplement (doi:10.3390/pharmaceutics16020272), 2024-02-14
Supplement: s1 [file s1]

# Seleno-warfare against cancer: Decoding antitumor activity of novel acylselenoureas and *Se*-acylisoselenoureas.

Eduardo Angulo-Elizari<sup>1</sup>, Asif Raza<sup>2</sup>, Ignacio Encío<sup>3,4</sup>, Arun K. Sharma<sup>2</sup>, Carmen Sanmartín<sup>1,3,\*</sup>, Daniel Plano<sup>1,3,\*</sup>

1 Departamento de Ciencias Farmacéuticas, Universidad de Navarra, Irunlarrea 1,31008 Pamplona, Spain; eangulo.1@alumni.unav.es (E.A.E.)

2 Department of Pharmacology, Penn State Cancer Institute, CH72, Penn State College of Medicine, 500 University Drive, Hershey, PA 17033, USA; mraza@pennstatehealth.psu.edu (A.R.); asharma1@pennstatehealth.psu.edu (A.K.S.)

3 Instituto de Investigación Sanitaria de Navarra (IdiSNA), Irunlarrea, 3, 31008 Pamplona, Spain; ignacio.encio@unavarra.es (I.E.)

4 Departamento de Ciencias de la Salud, Universidad Pública de Navarra, Avda. Barañain s/n, 31008 Pamplona, Spain

\* Correspondence: sanmartin@unav.es (C.S.); dplano@unav.es (D.P.)

## Table of contents

| <b>Biological evaluation</b>                                       |                 |
|--------------------------------------------------------------------|-----------------|
| Cytotoxicity screening                                             | Figure S1       |
| NCI-60 Analysis                                                    |                 |
| Compound 1 (One-Dose Assay)                                        | Figure S2       |
| Compound 4 (One-Dose Assay)                                        | Figure S3       |
| Compound 8 (One-Dose Assay)                                        | Figure S4       |
| Compound 9 (One-Dose Assay)                                        | Figure S5       |
| Compound 10 (One-Dose Assay)                                       | Figure S6       |
| Compound 12 (One-Dose Assay)                                       | Figure S7       |
| Compound 15 (One-Dose Assay)                                       | Figure S8       |
| Compound 16 (One-Dose Assay)                                       | Figure S9       |
| Compound 17 (One-Dose Assay)                                       | Figure S10      |
| Compound 19 (One-Dose Assay)                                       | Figure S11      |
| Compound 1 (Five-Dose Assay)                                       | Figure S12      |
| Compound 4 (Five-Dose Assay)                                       | Figure S13      |
| Compound 9 (Five-Dose Assay)                                       | Figure S14      |
| Compound 10 (Five-Dose Assay)                                      | Figure S15      |
| Compound 15 (Five-Dose Assay)                                      | Figure S16      |
| Compound 16 (Five-Dose Assay)                                      | Figure S17      |
| Compound 17 (Five-Dose Assay)                                      | Figure S18      |
| <b>Structural characterization</b>                                 |                 |
| <sup>1</sup> H-, <sup>13</sup> C- and <sup>77</sup> Se-NMR spectra | Figures S19–S83 |
| Characterization of the compounds synthesized in this work         |                 |

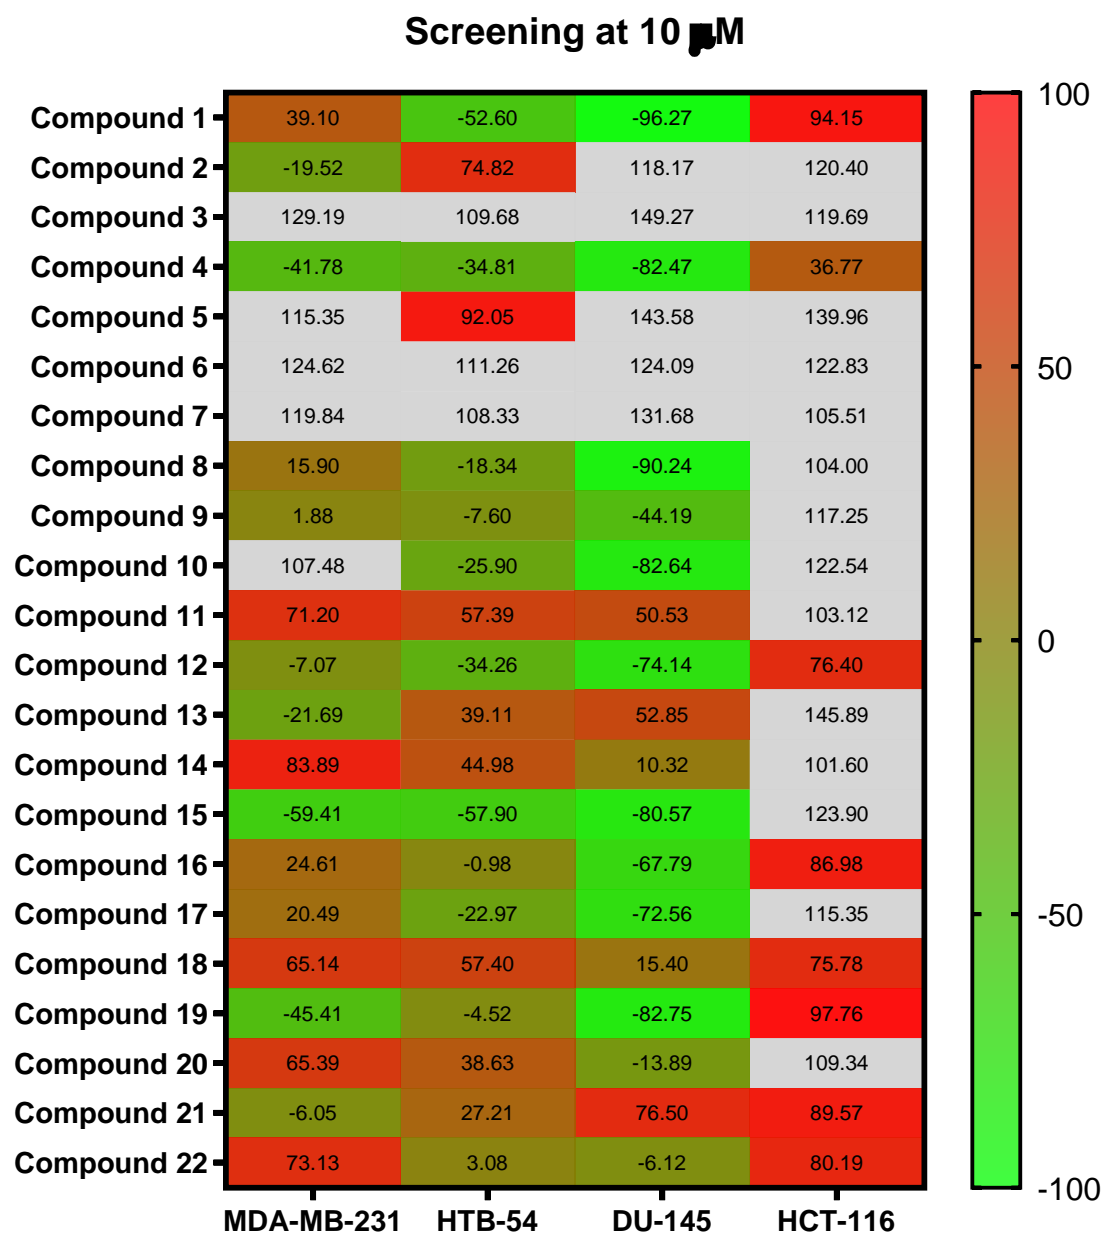

**Figure S1.** Heat map of screening results where the percentage of cell growth is represented at 10  $\mu$ M for the 22 novel compounds in MDA-MB-231, HTB-54, DU-145 and HCT-116 cells.

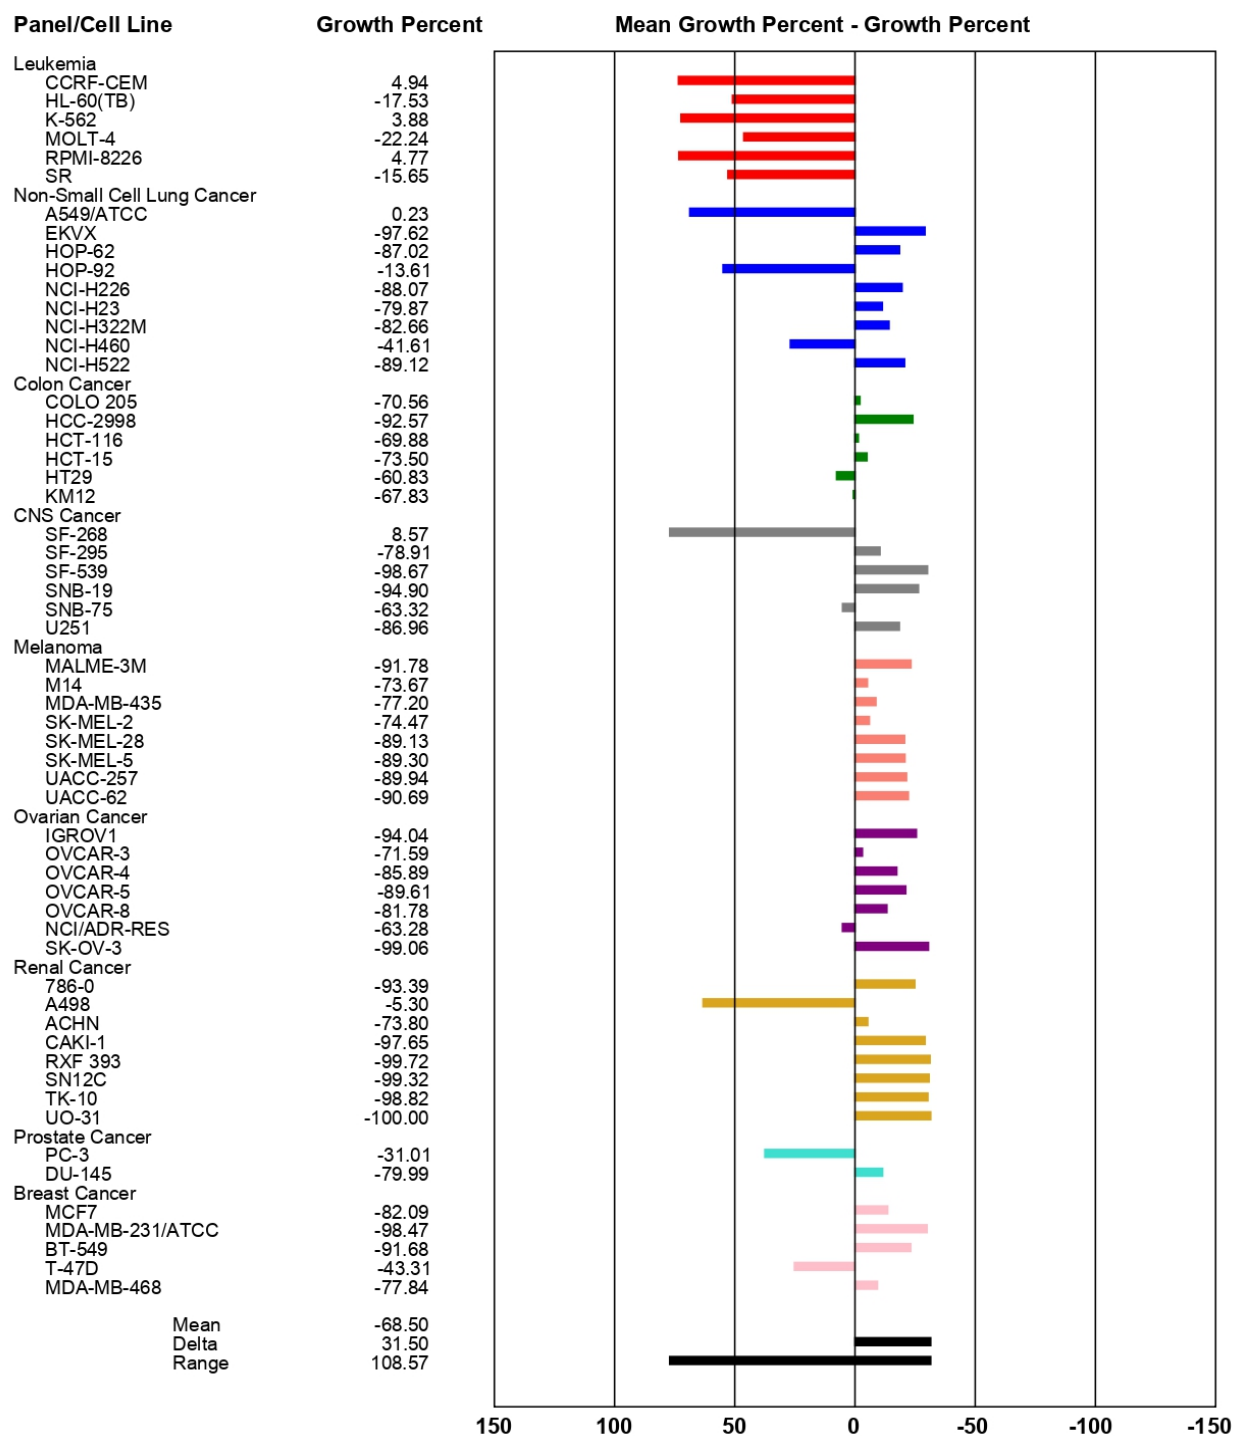

**Figure S2.** One-Dose Assay of compound **1** at 10  $\mu$ M after 48h of treatment.

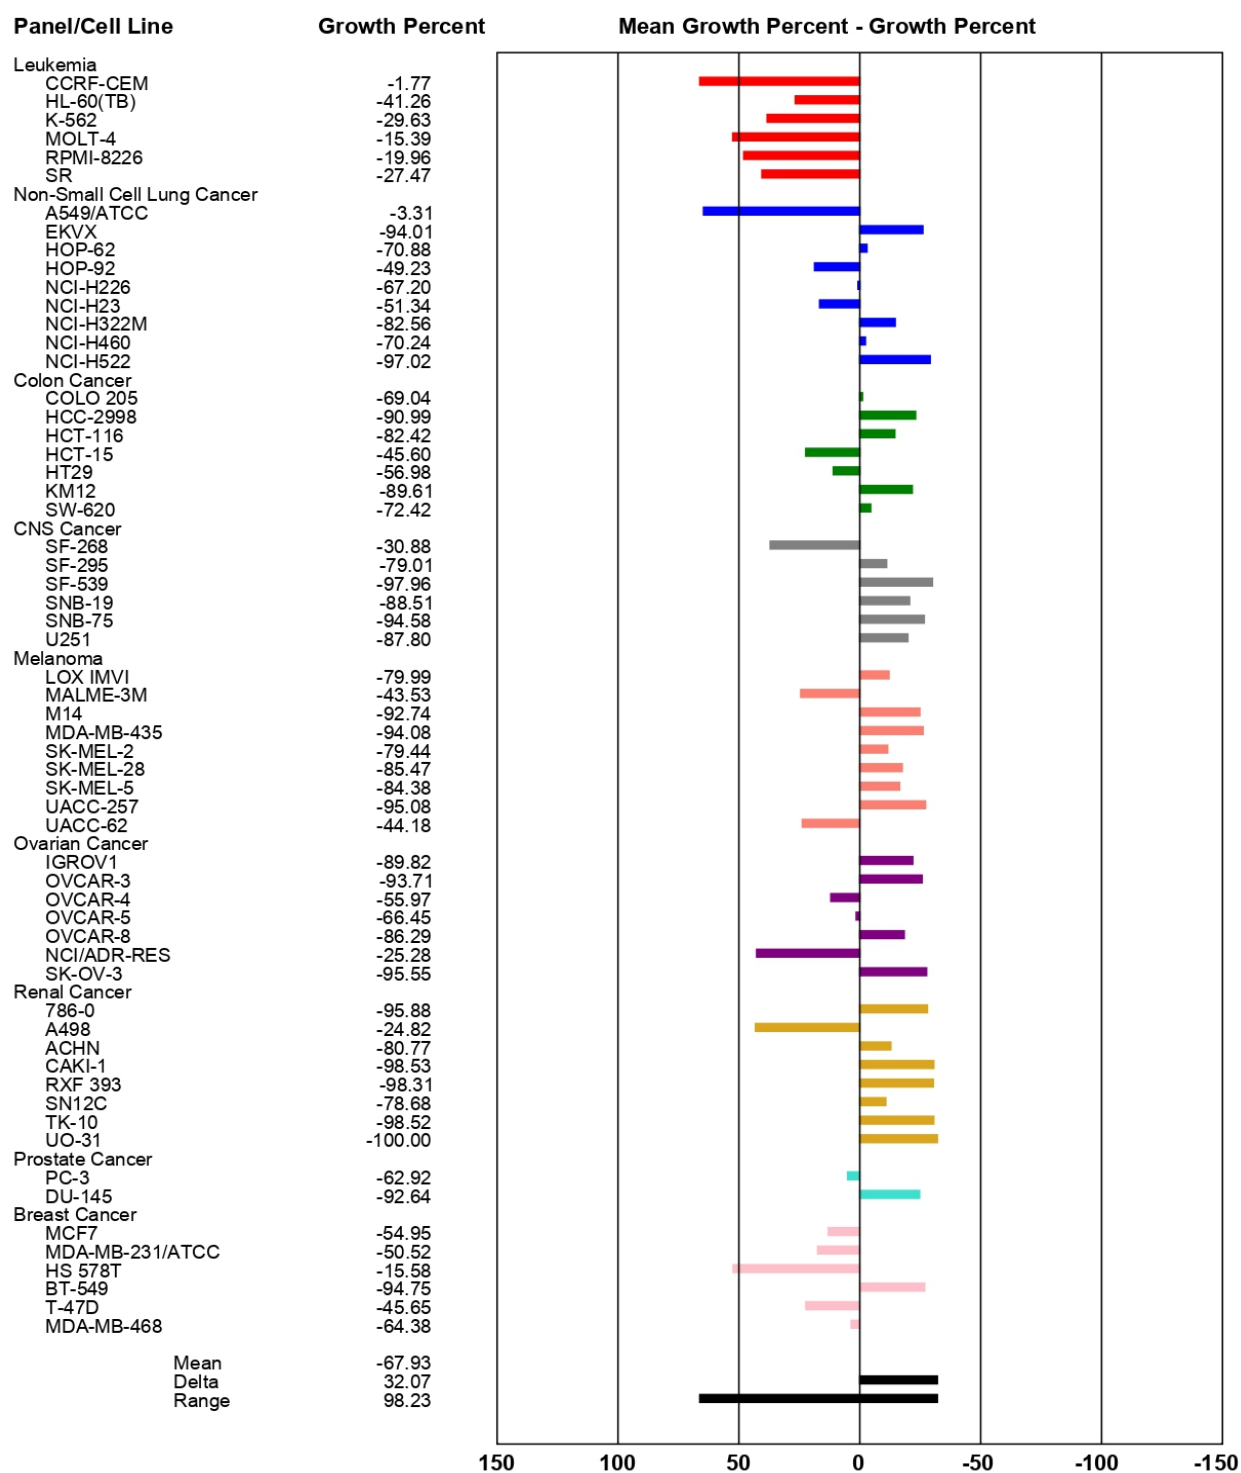

**Figure S3.** One-Dose Assay of compound **4** at 10  $\mu$ M after 48h of treatment.



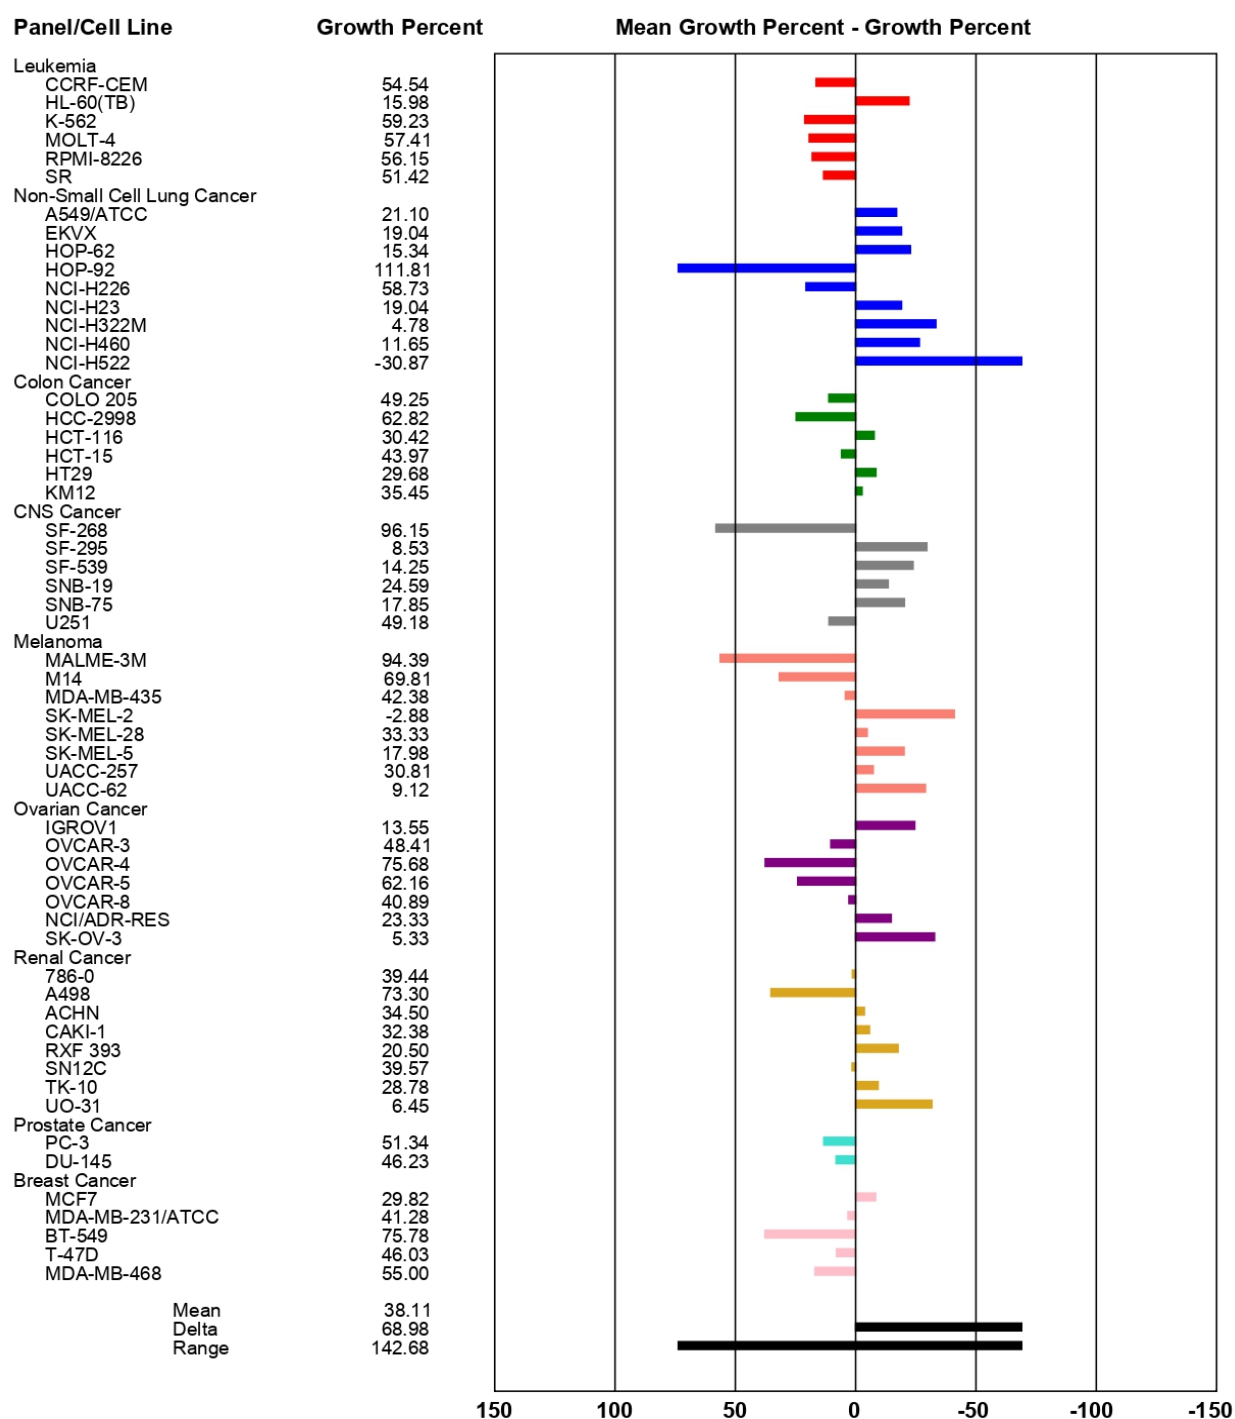

**Figure S4.** One-Dose Assay of compound **8** at 10  $\mu$ M after 48h of treatment.

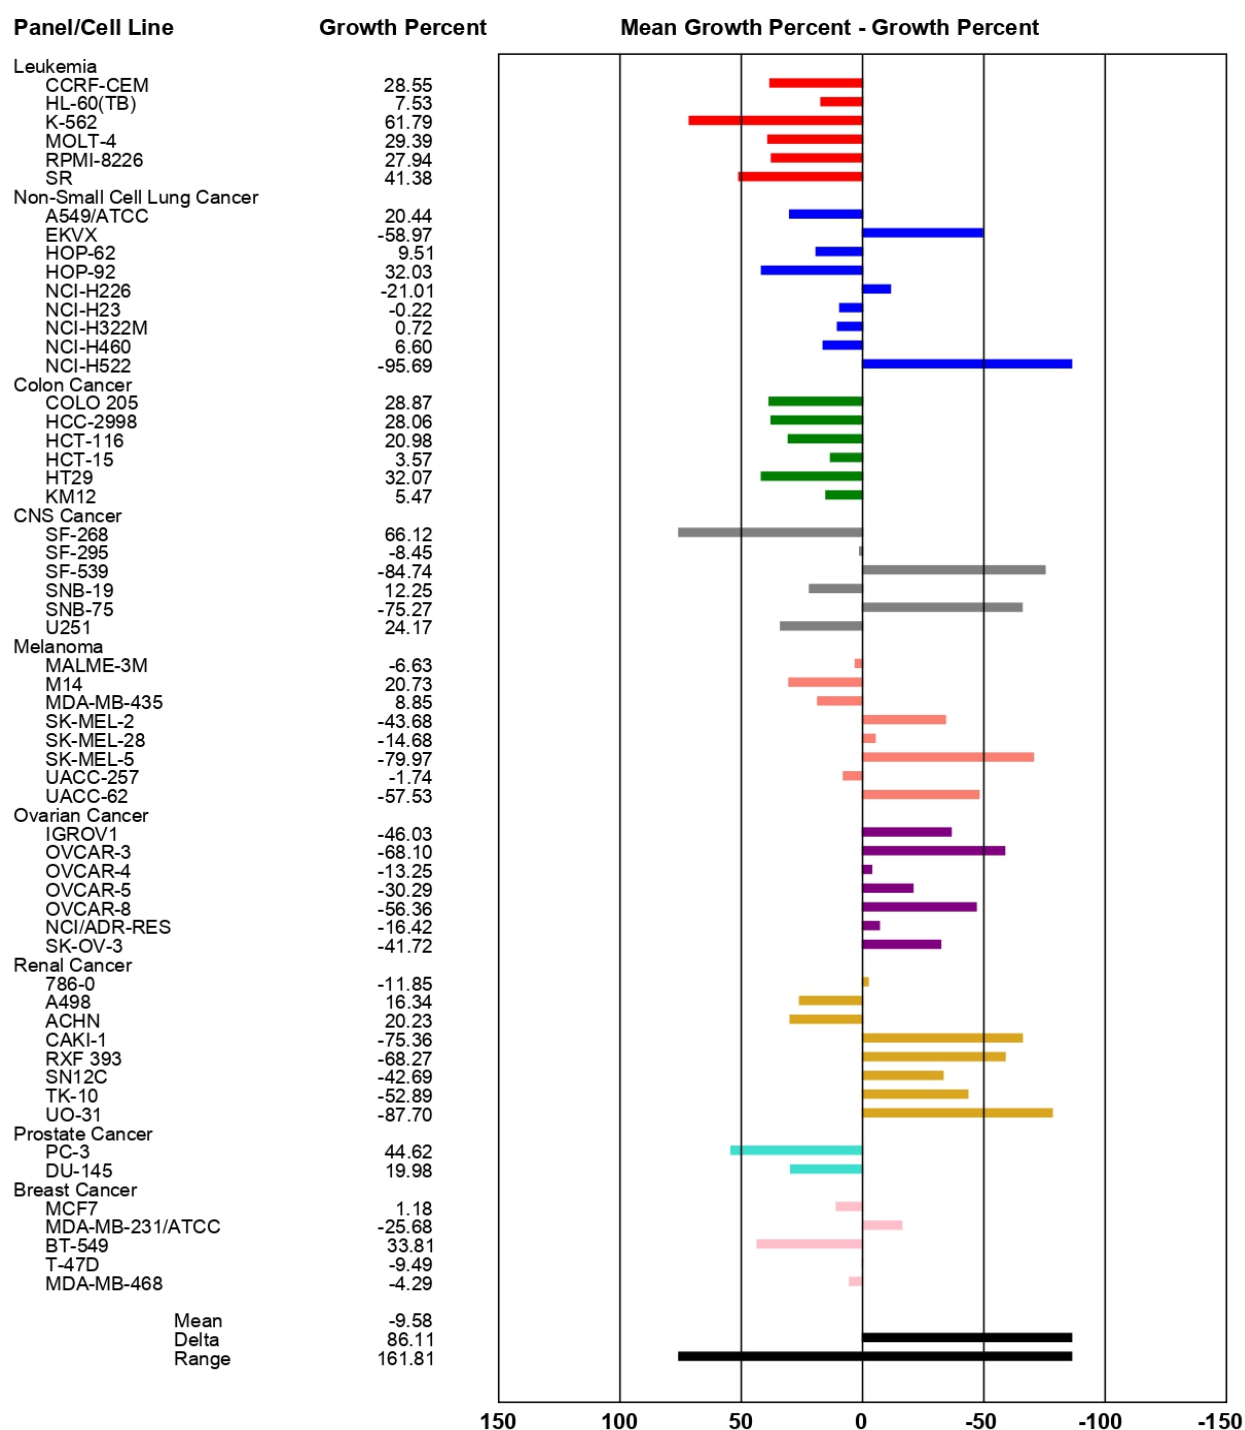

**Figure S5.** One-Dose Assay of compound **9** at 10  $\mu$ M after 48h of treatment.

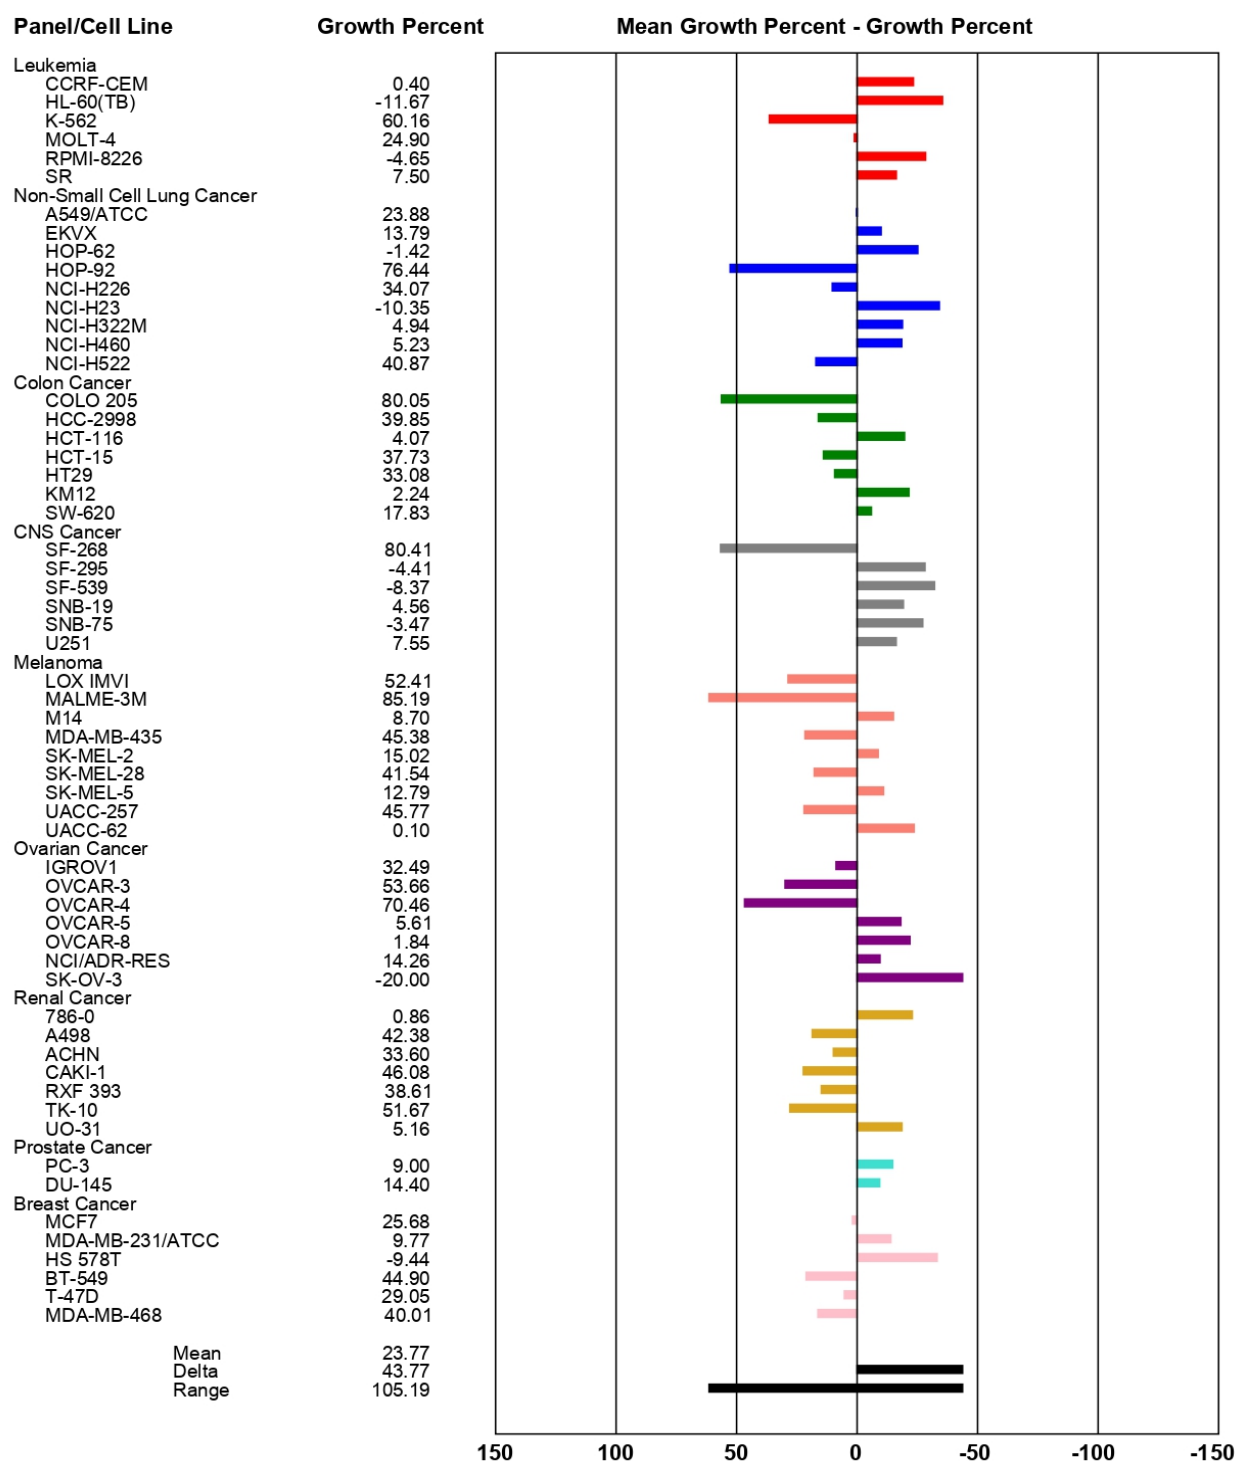

**Figure S6.** One-Dose Assay of compound **10** at 10  $\mu$ M after 48h of treatment.

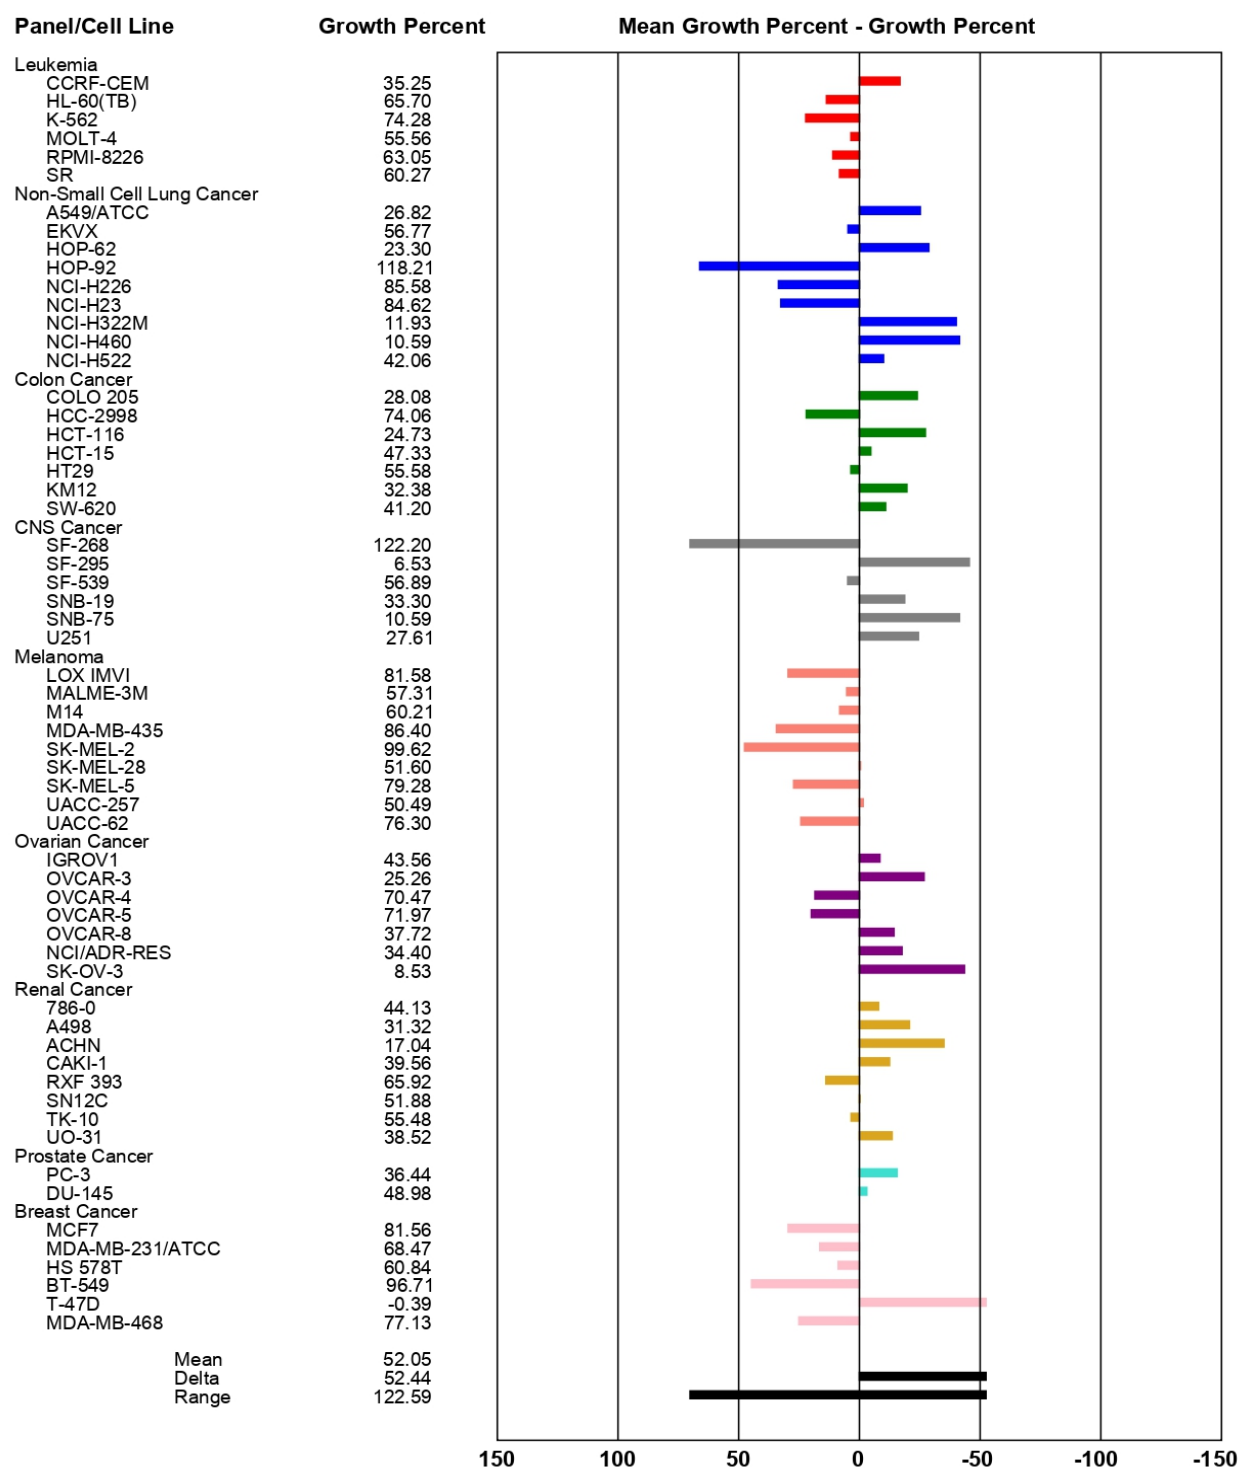

**Figure S7.** One-Dose Assay of compound **12** at 10  $\mu$ M after 48h of treatment.

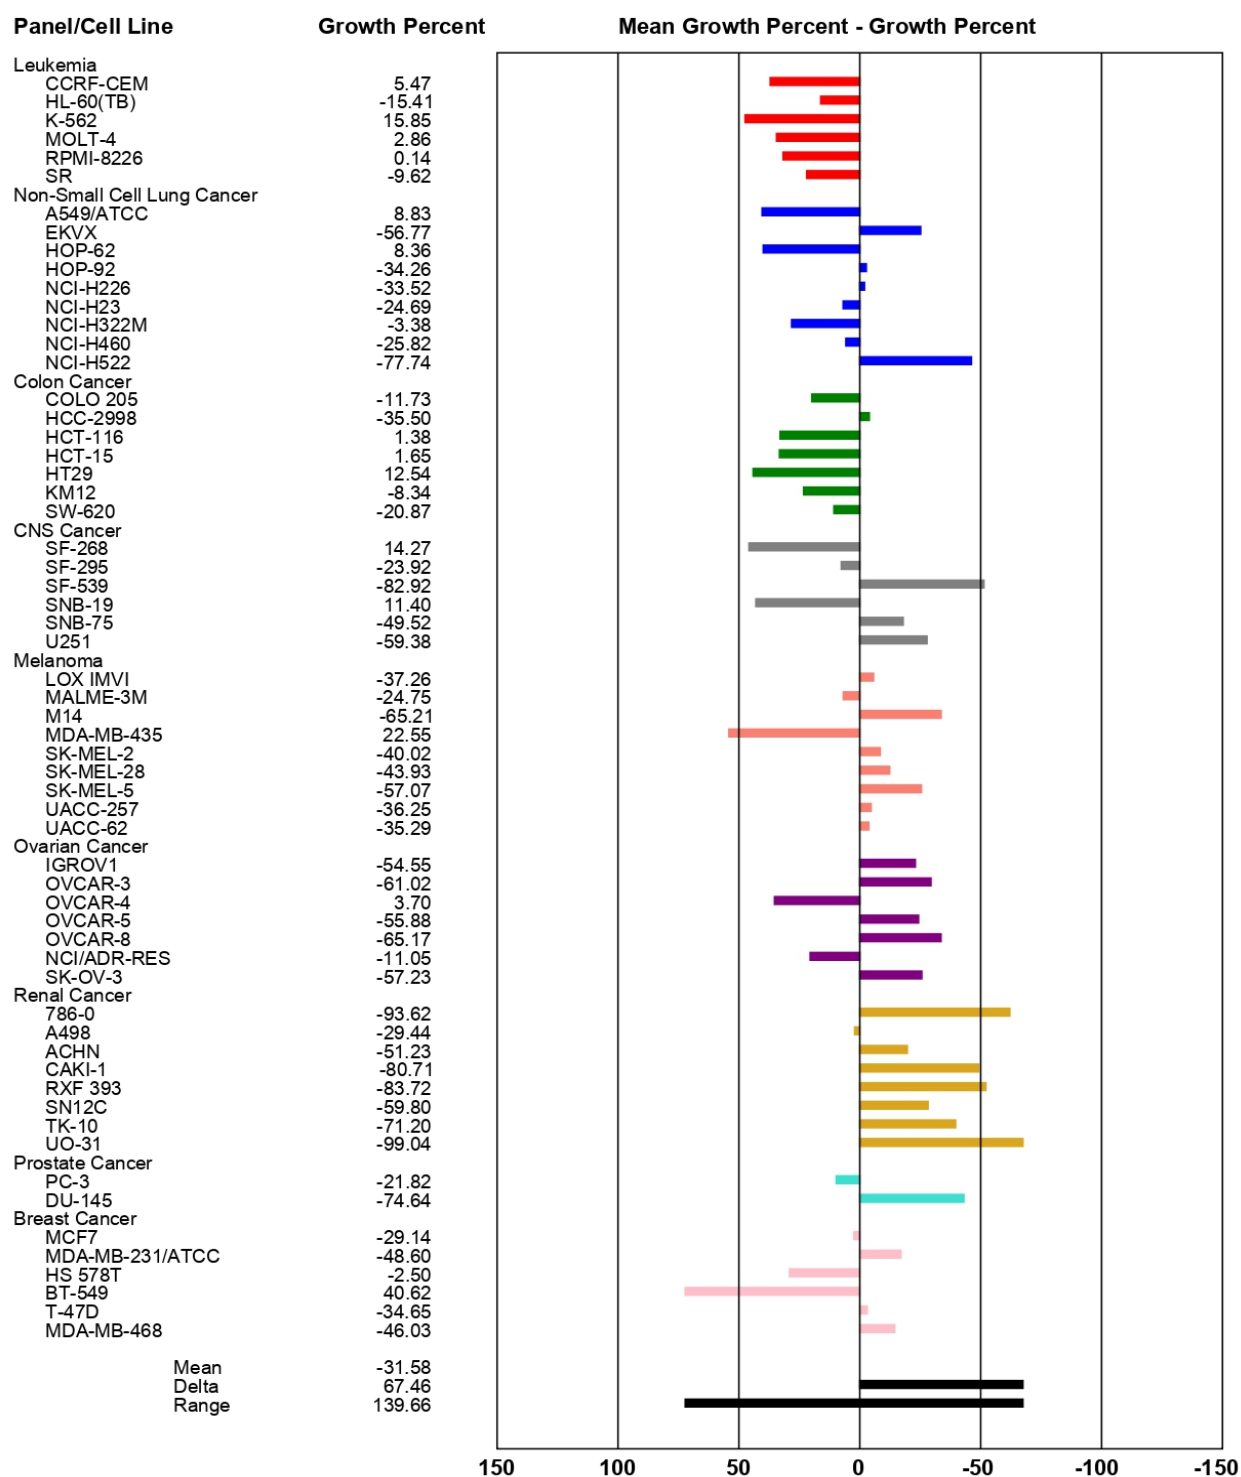

**Figure S8.** One-Dose Assay of compound **15** at 10  $\mu$ M after 48h of treatment.

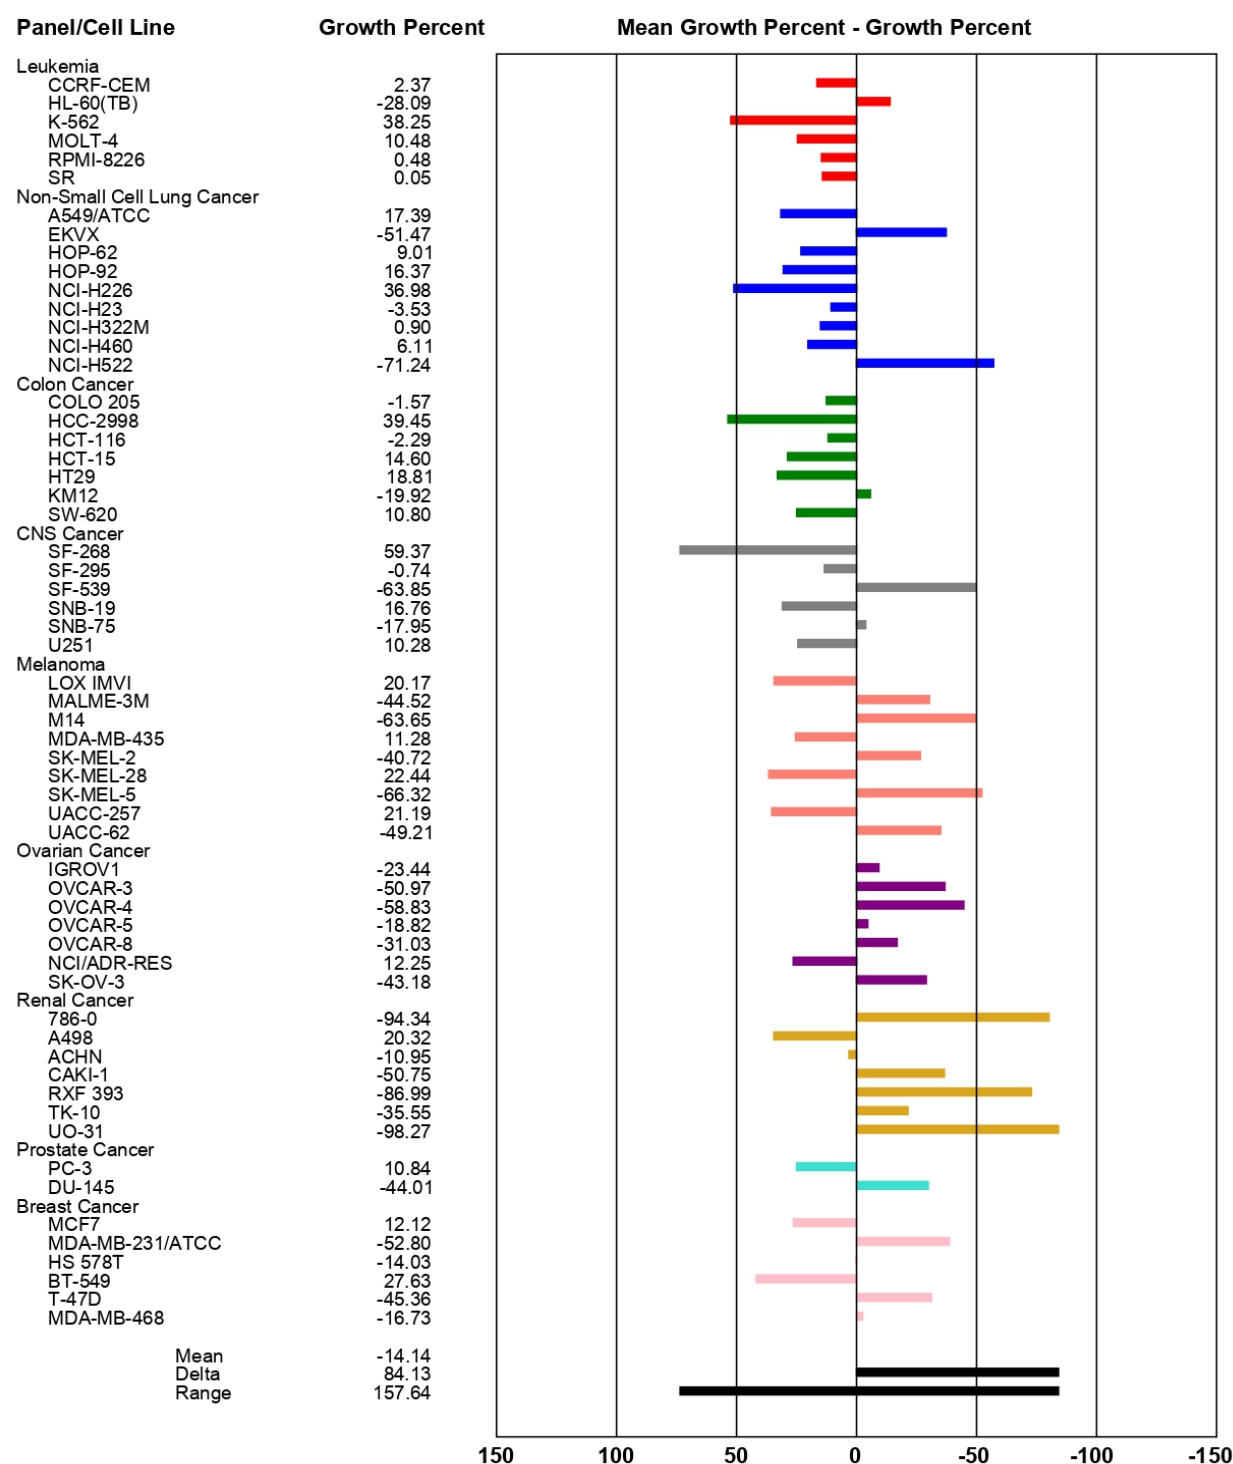

**Figure S9.** One-Dose Assay of compound **16** at 10  $\mu$ M after 48h of treatment.

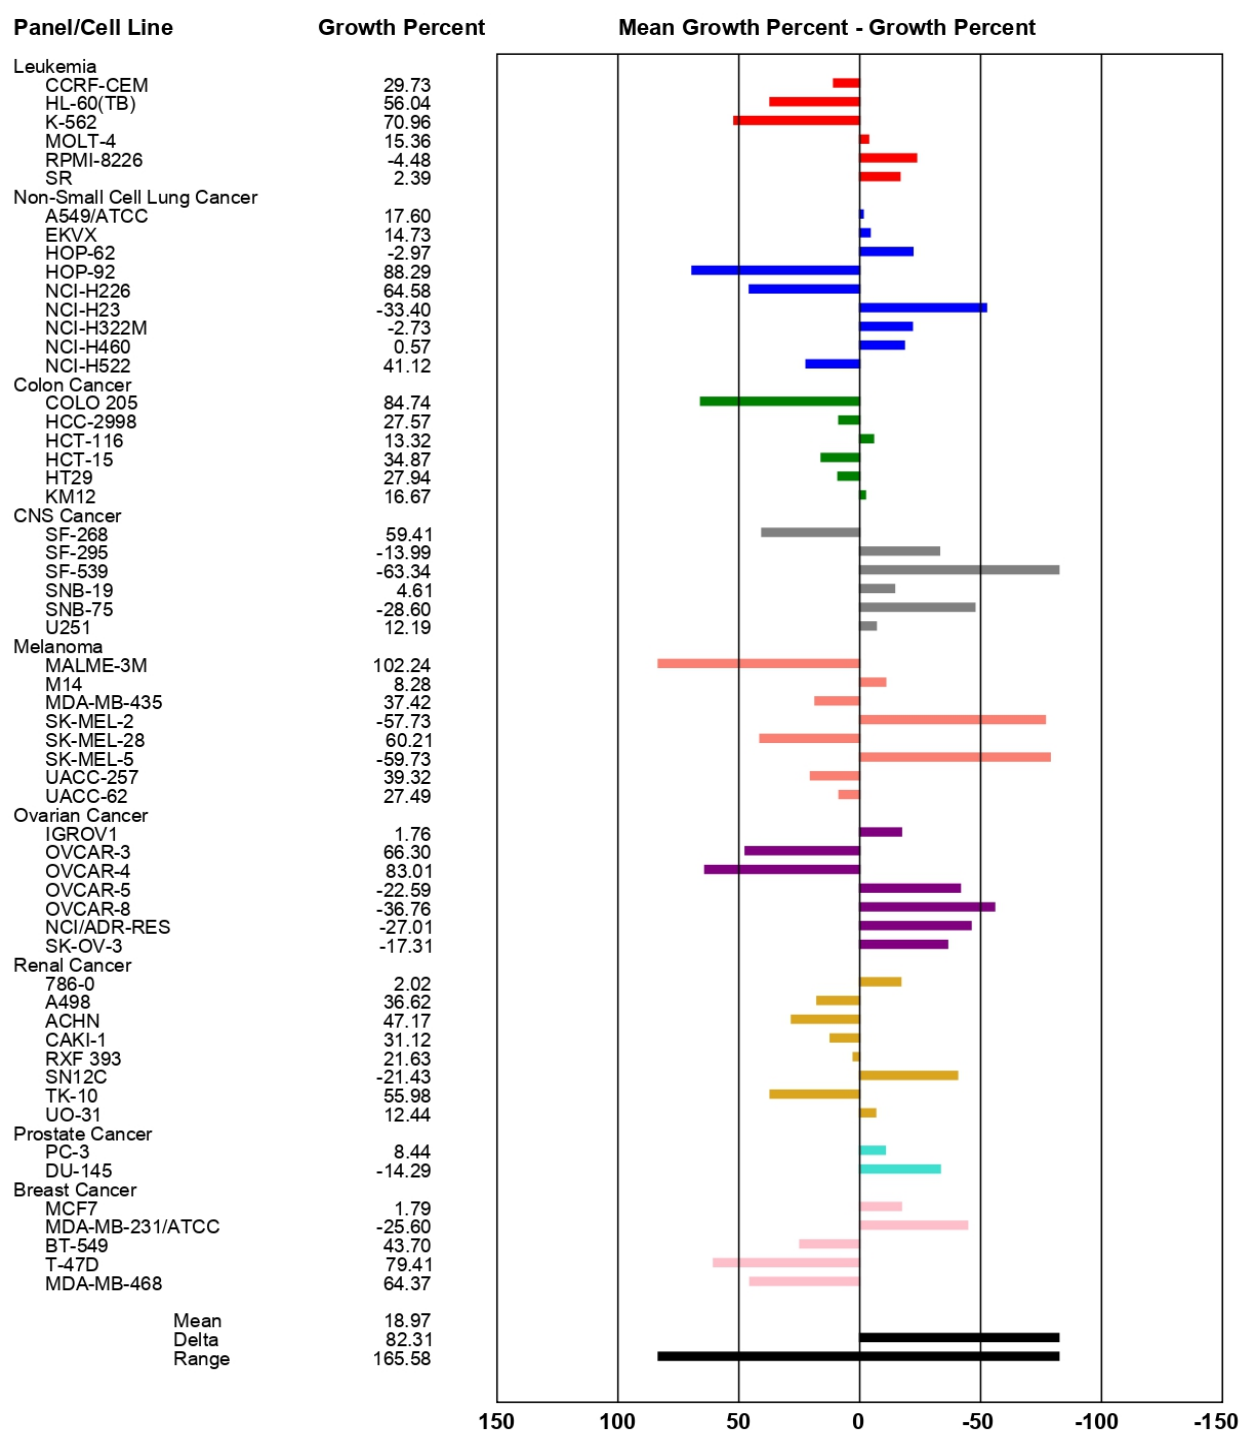

**Figure S10.** One-Dose Assay of compound 17 at 10  $\mu$ M after 48h of treatment.

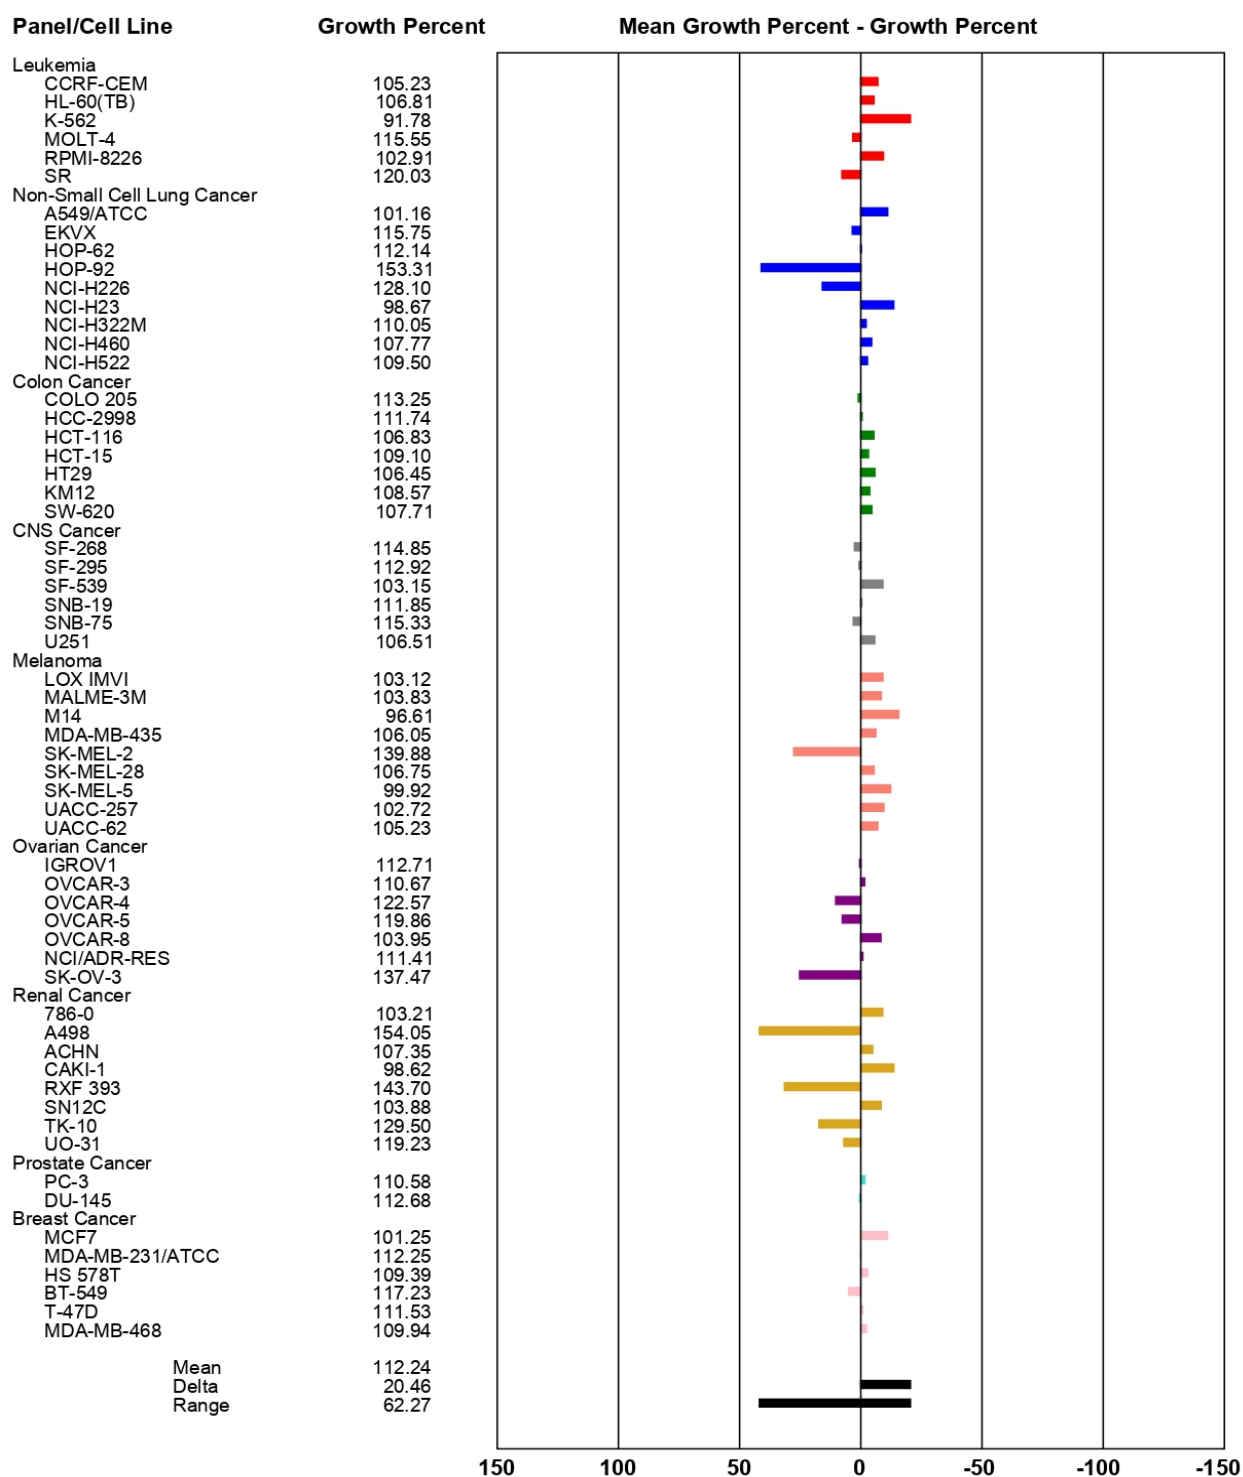

**Figure S11.** One-Dose Assay of compound **19** at 10  $\mu$ M after 48h of treatment.



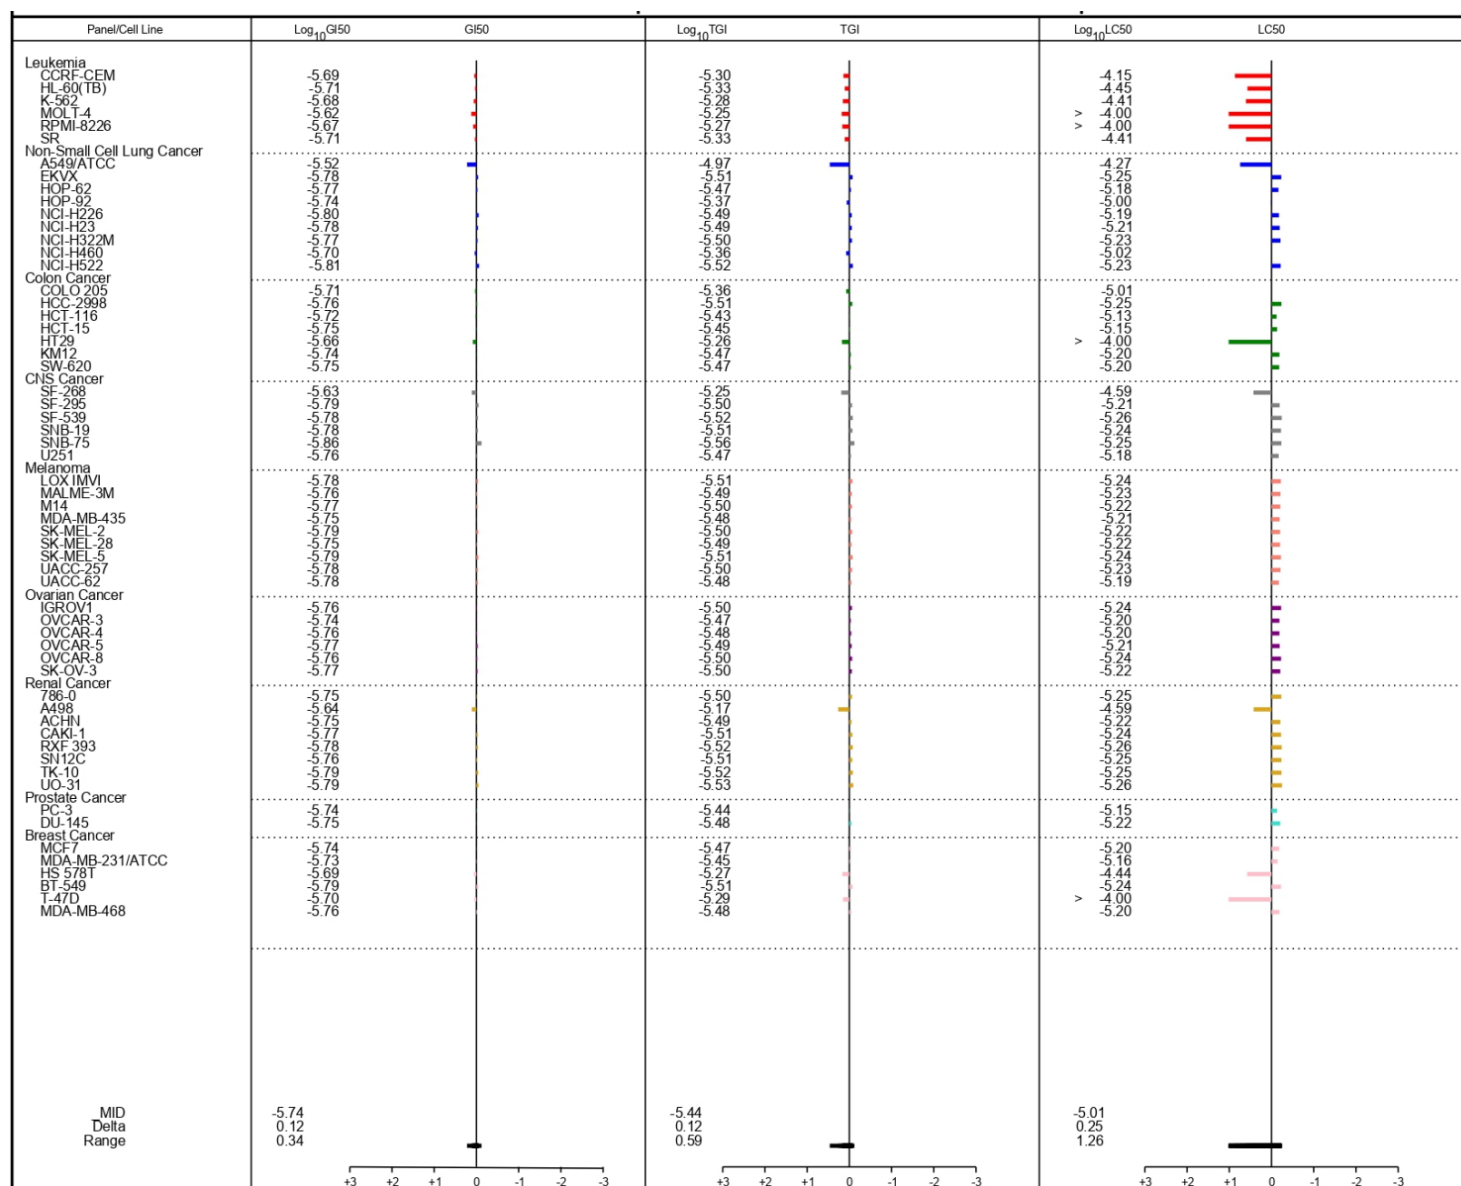

**Figure S12.** Growth inhibition 50, total growth inhibition, and lethal concentration 50 values for compound 1 after 48h of treatment.

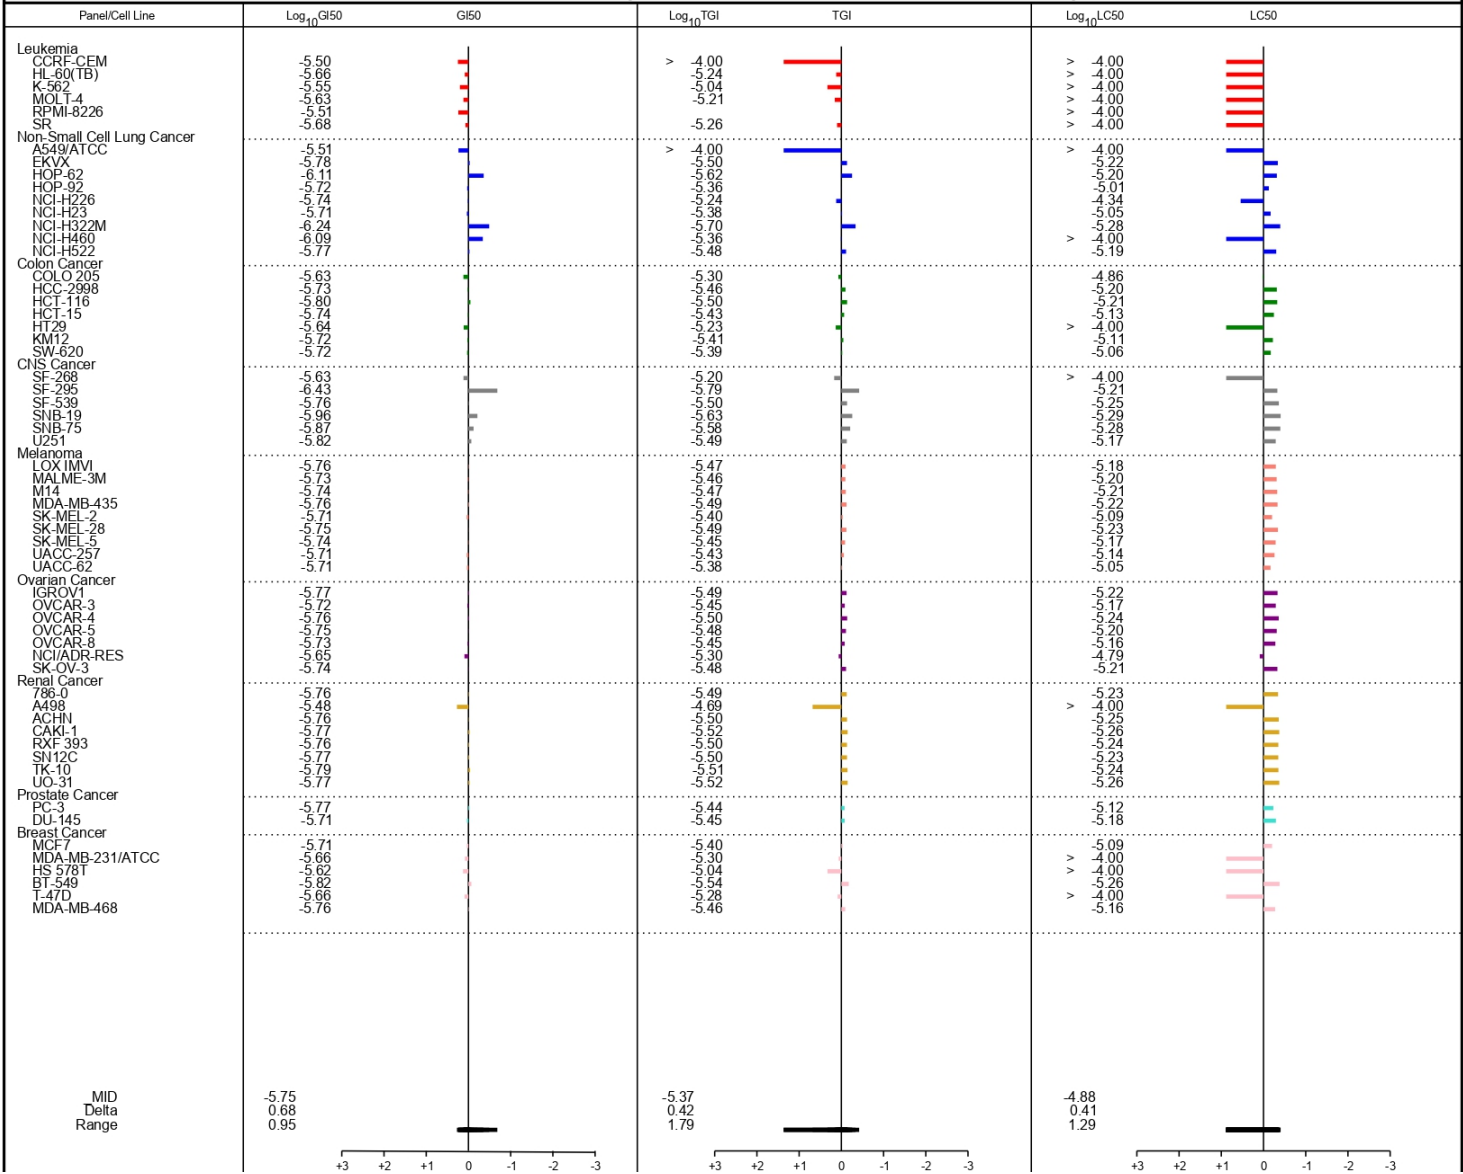

**Figure S13.** Growth inhibition 50, total growth inhibition, and lethal concentration 50 values for compound 4 after 48h of treatment.

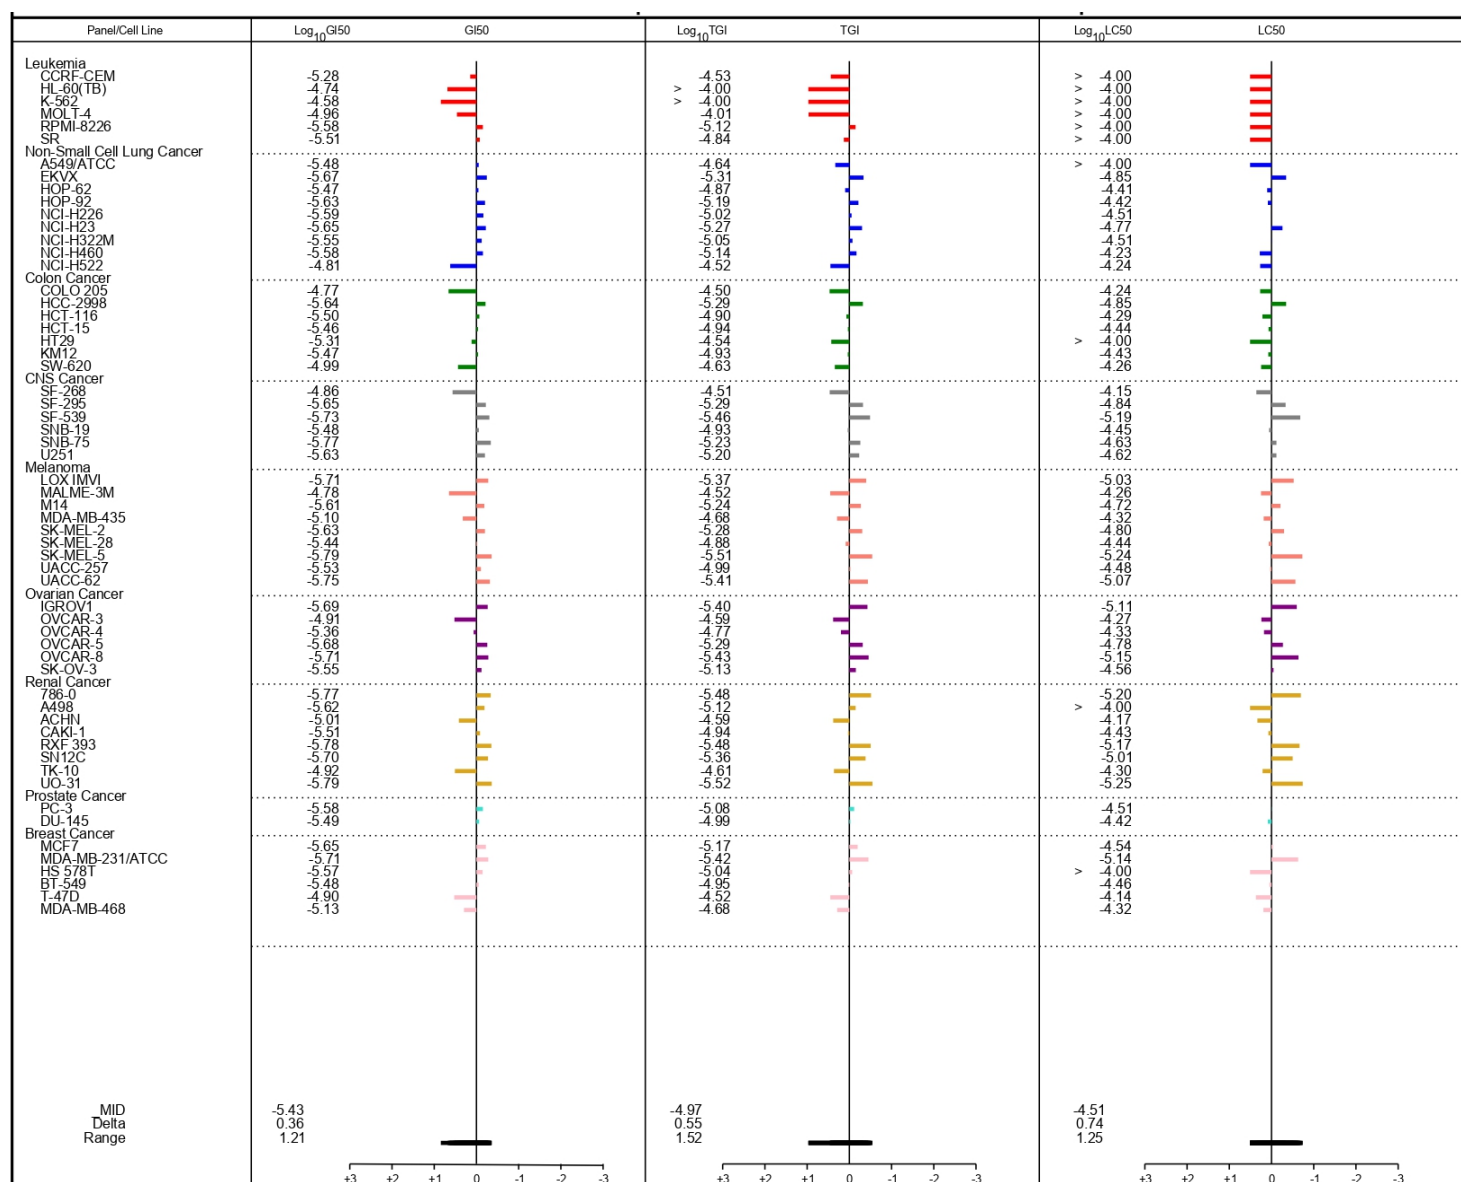

**Figure S14.** Growth inhibition 50, total growth inhibition, and lethal concentration 50 values for compound **9** after 48h of treatment.

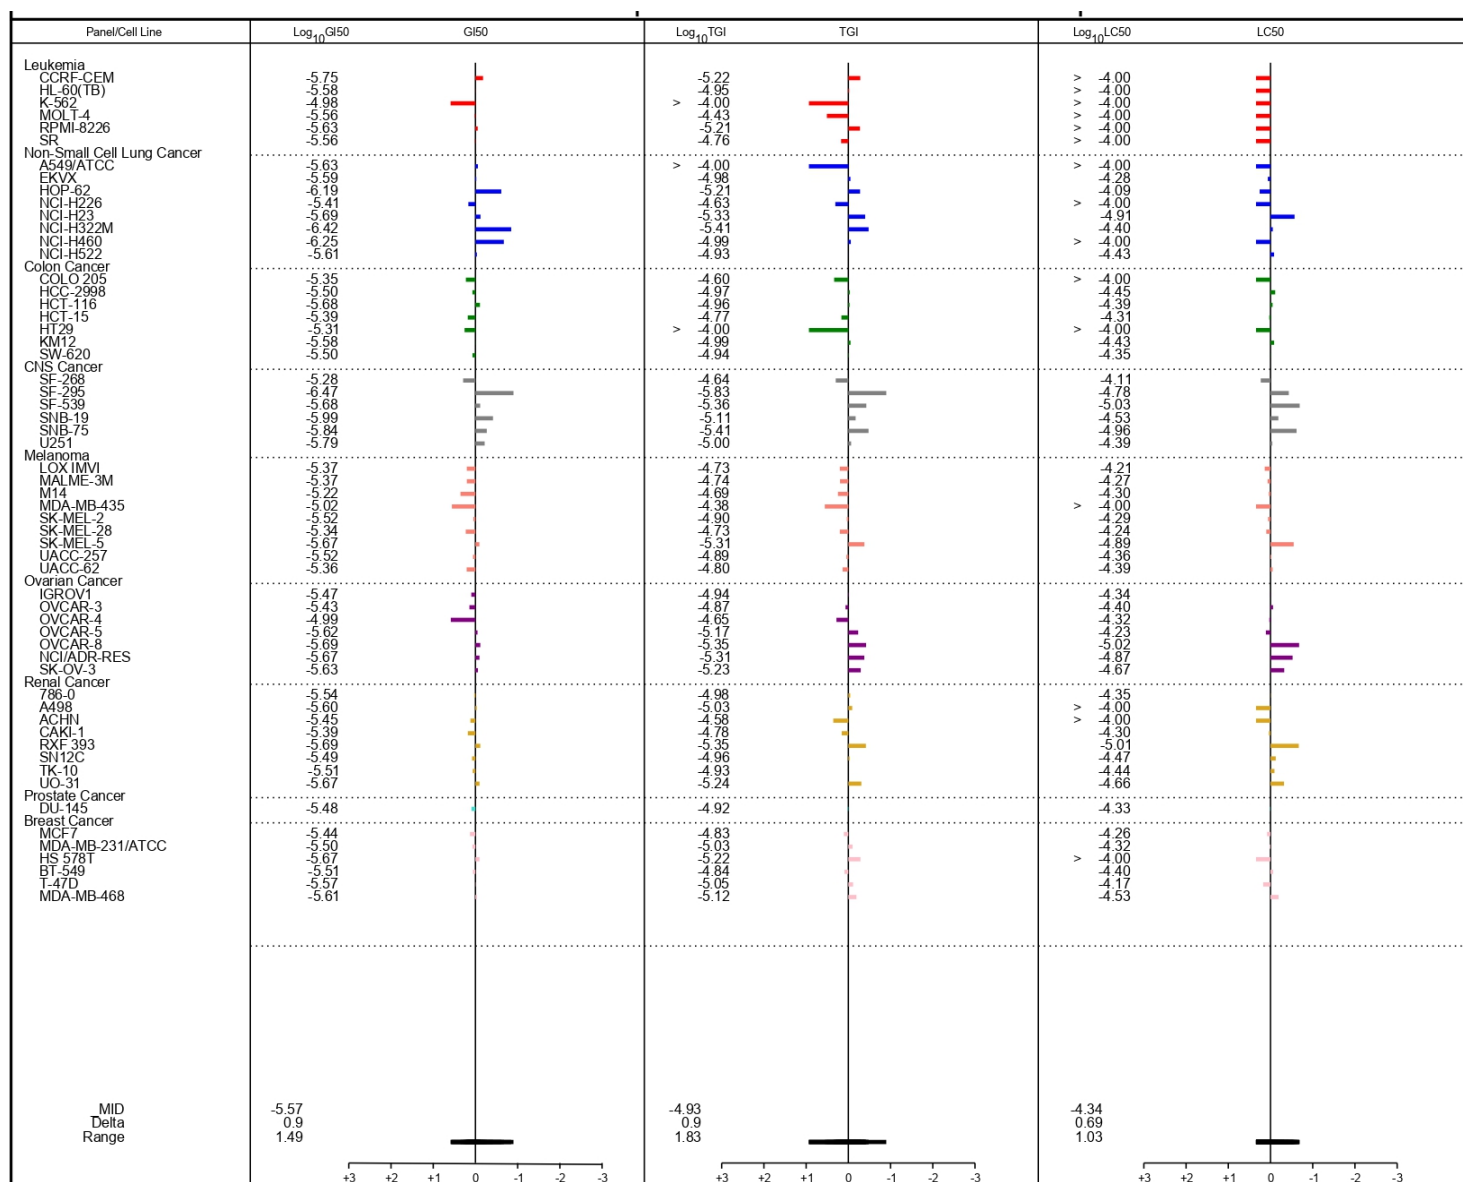

**Figure S15.** Growth inhibition 50, total growth inhibition, and lethal concentration 50 values for compound **10** after 48h of treatment.

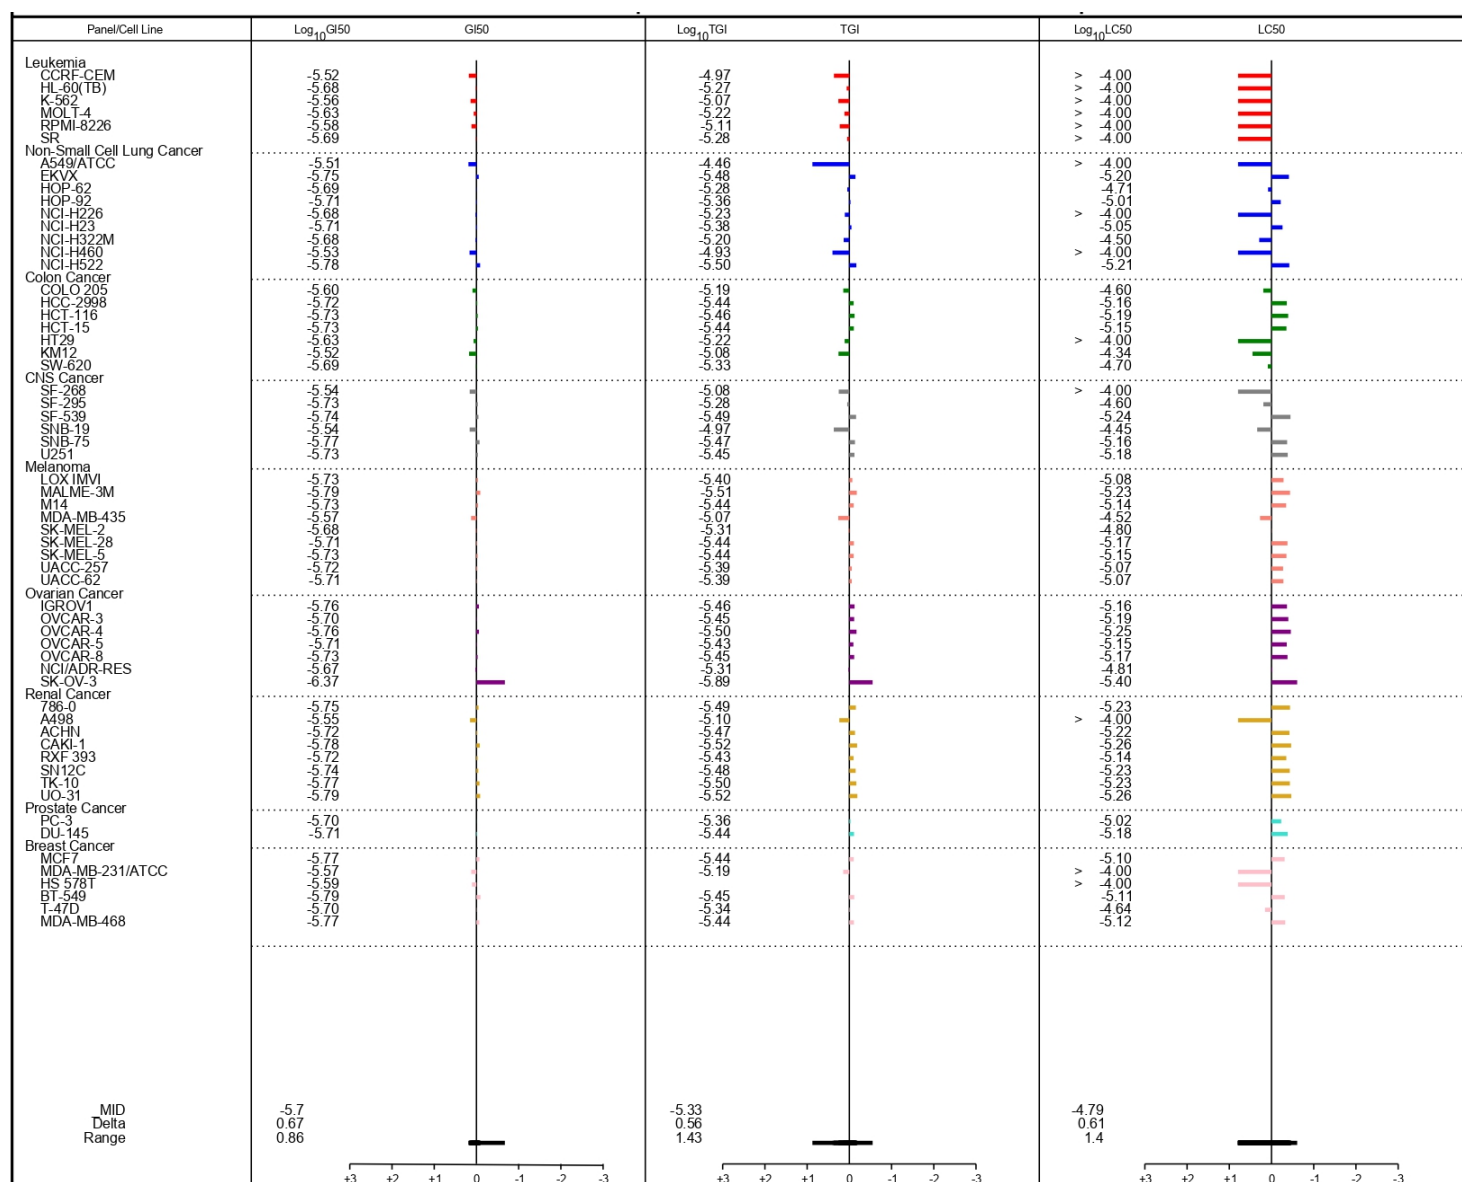

**Figure S16.** Growth inhibition 50, total growth inhibition, and lethal concentration 50 values for compound **15** after 48h of treatment.

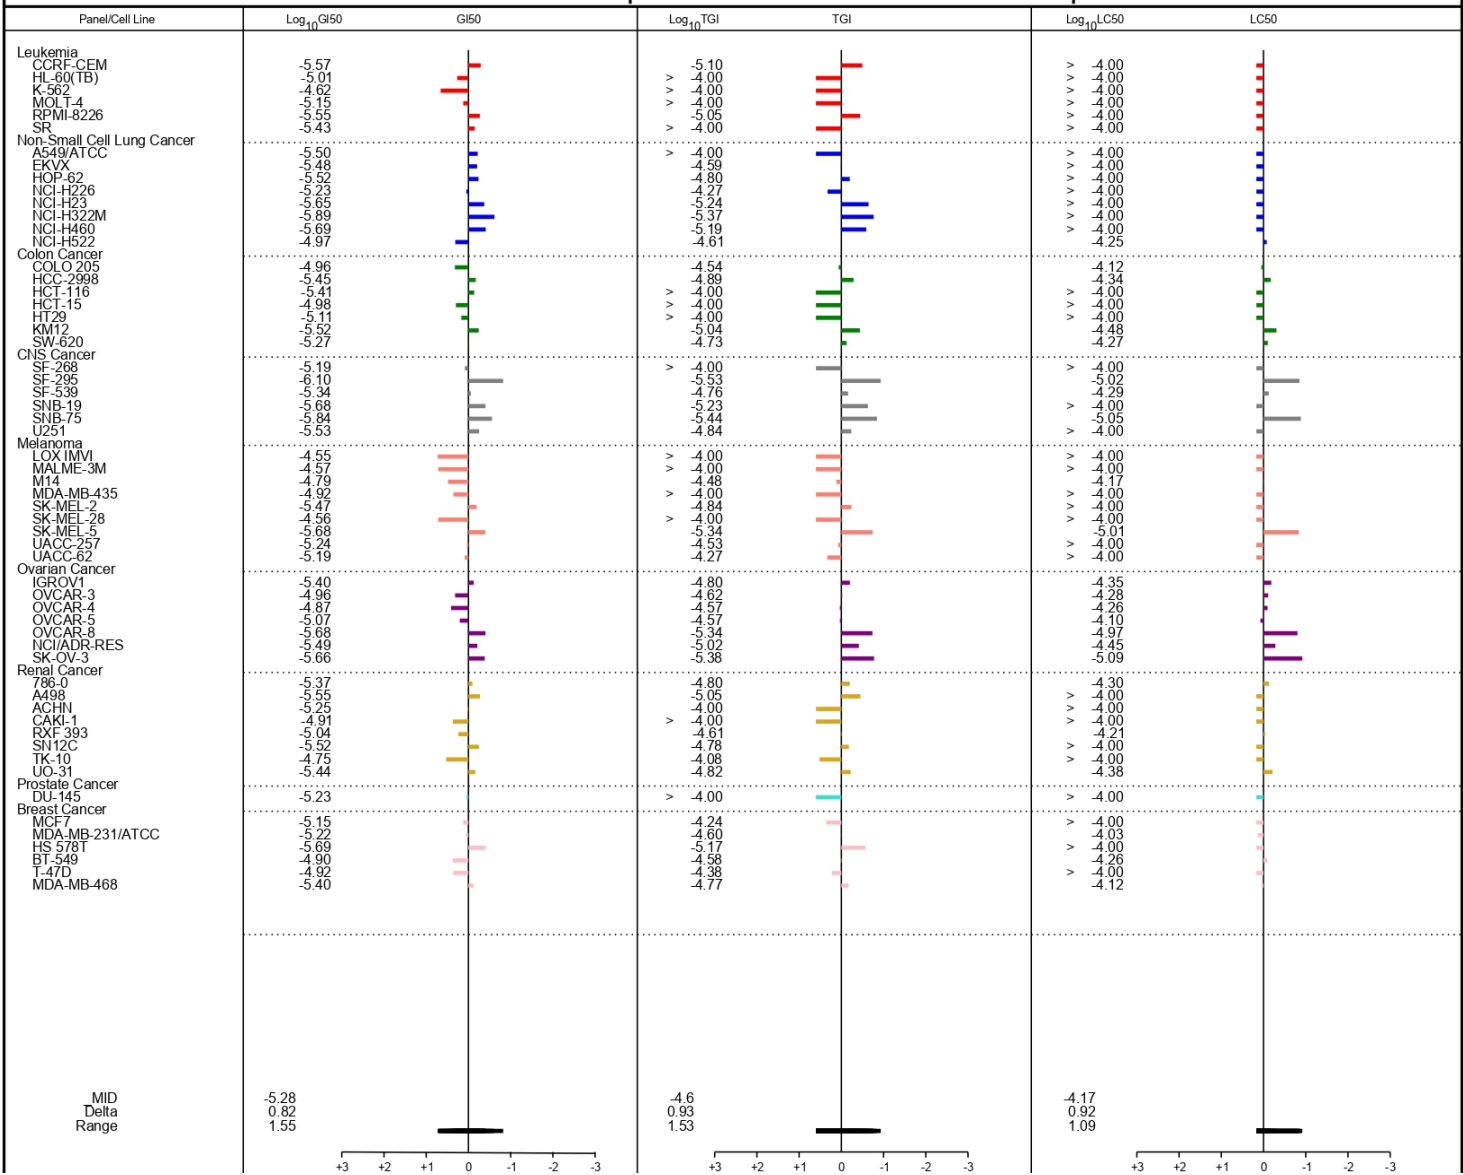

**Figure S17.** Growth inhibition 50, total growth inhibition, and lethal concentration 50 values for compound **16** after 48h of treatment.

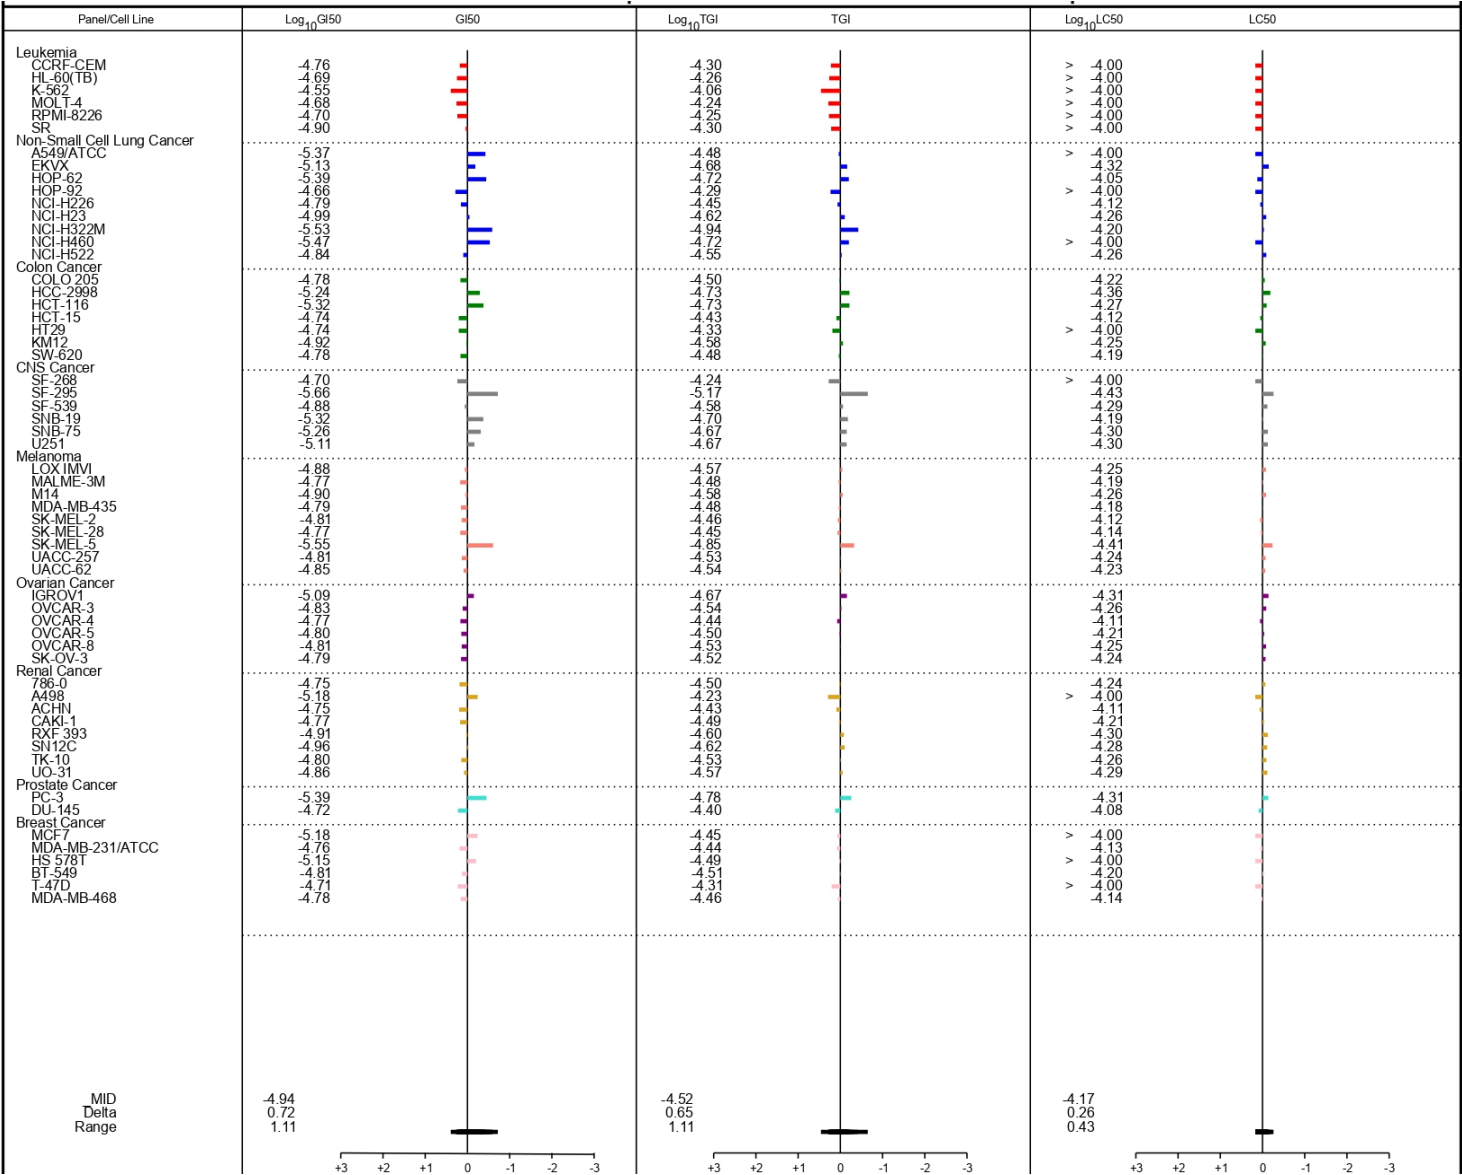

**Figure S18.** Growth inhibition 50, total growth inhibition, and lethal concentration 50 values for compound **17** after 48h of treatment.

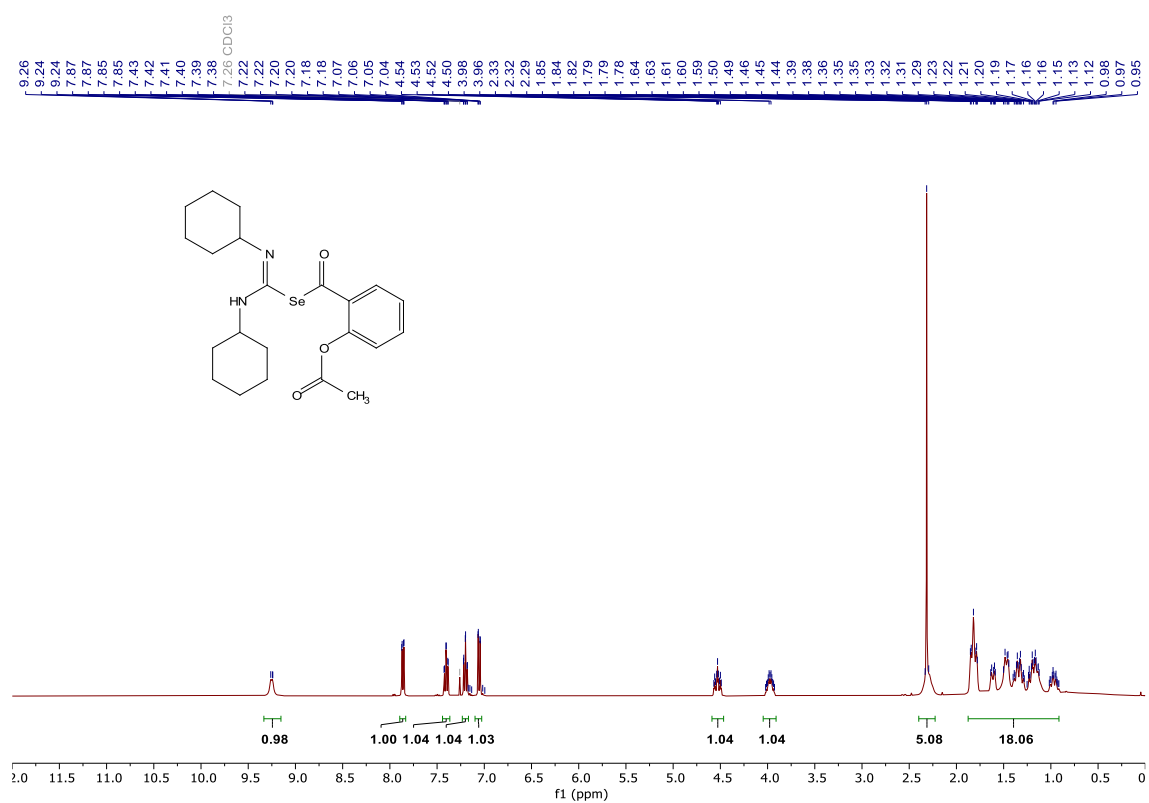

Figure S19. <sup>1</sup>H-NMR spectrum of compound 1.

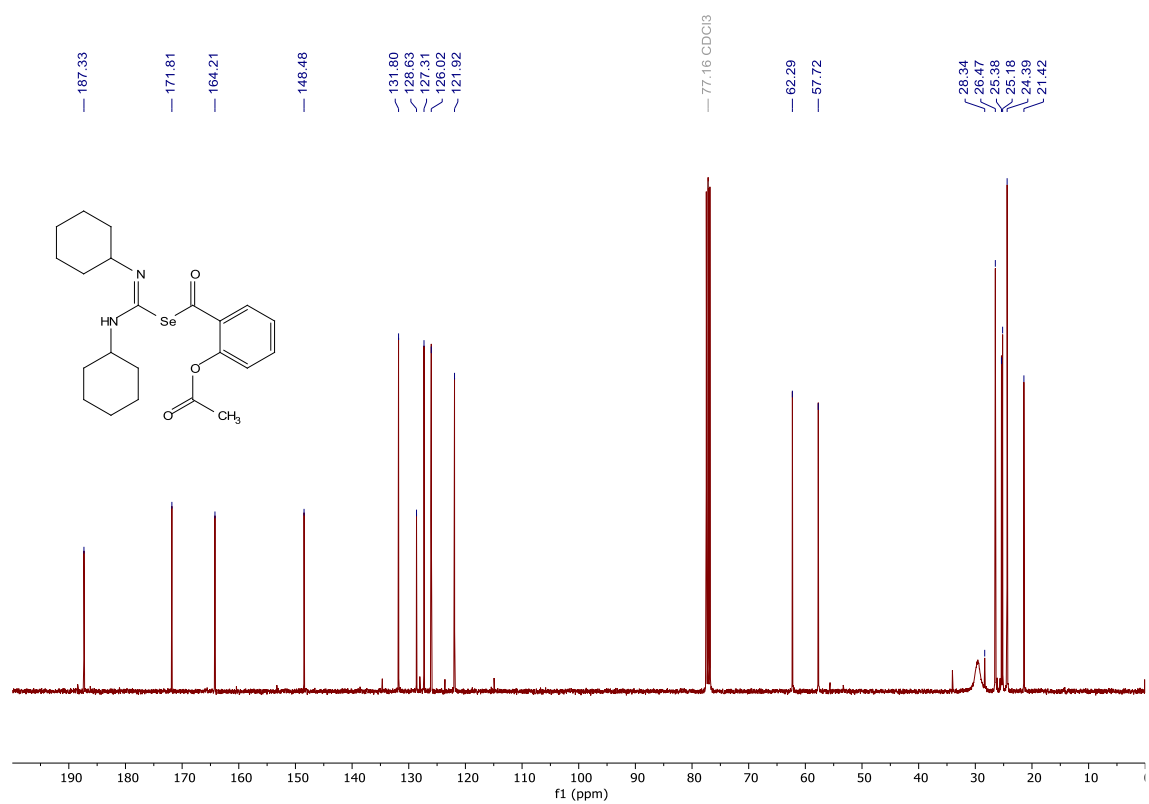

Figure S20. <sup>13</sup>C-NMR spectrum of compound 1.



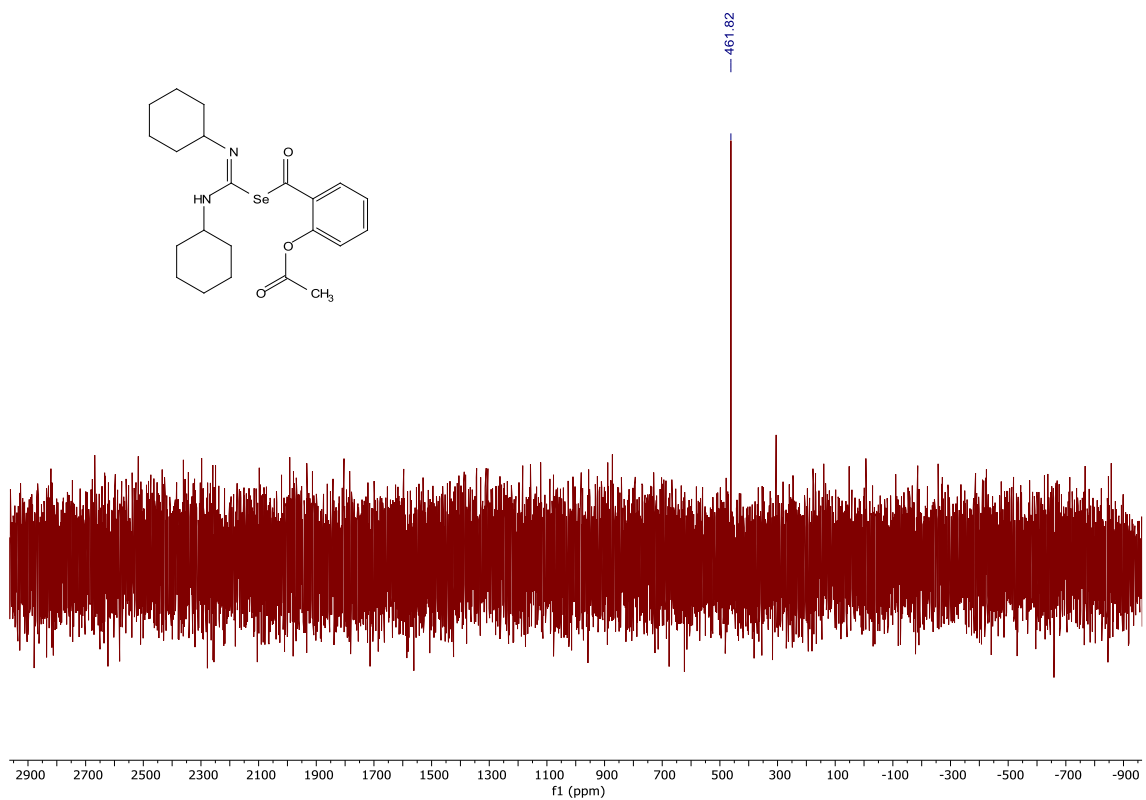

Figure S21. <sup>77</sup>Se-NMR spectrum of compound 1.

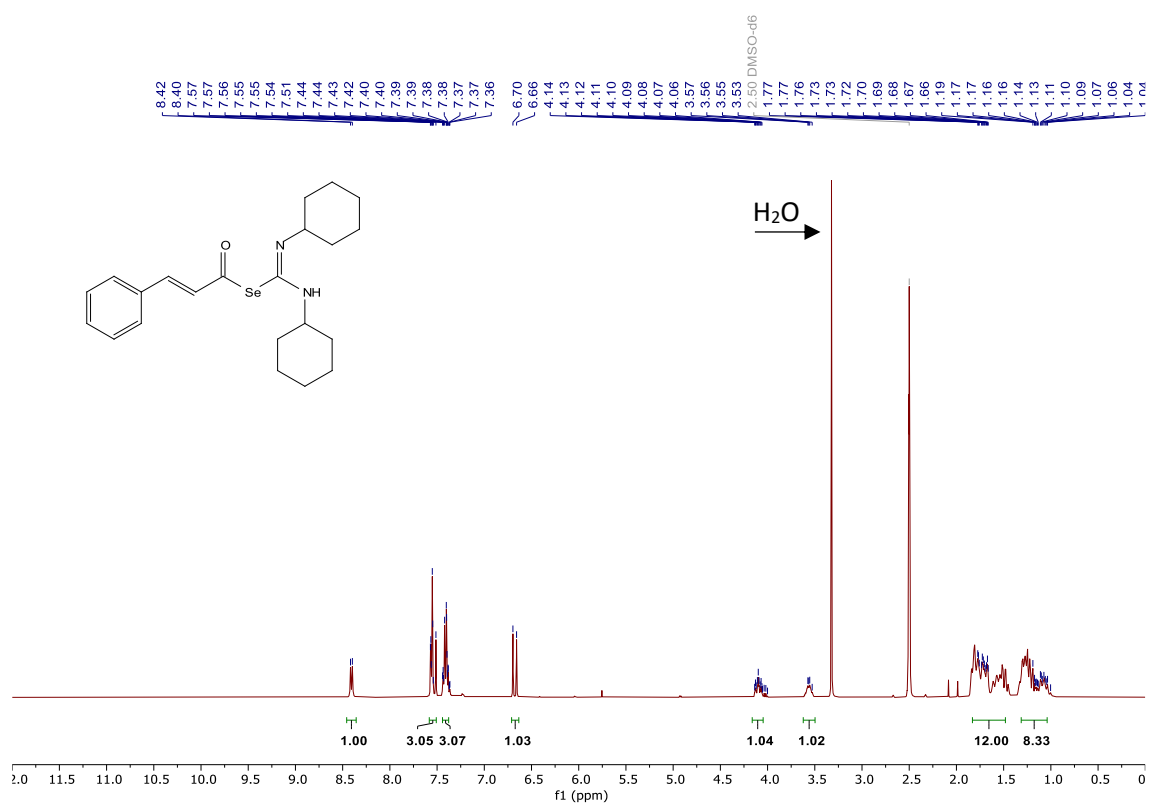

Figure S22. <sup>1</sup>H-NMR spectrum of compound 2.

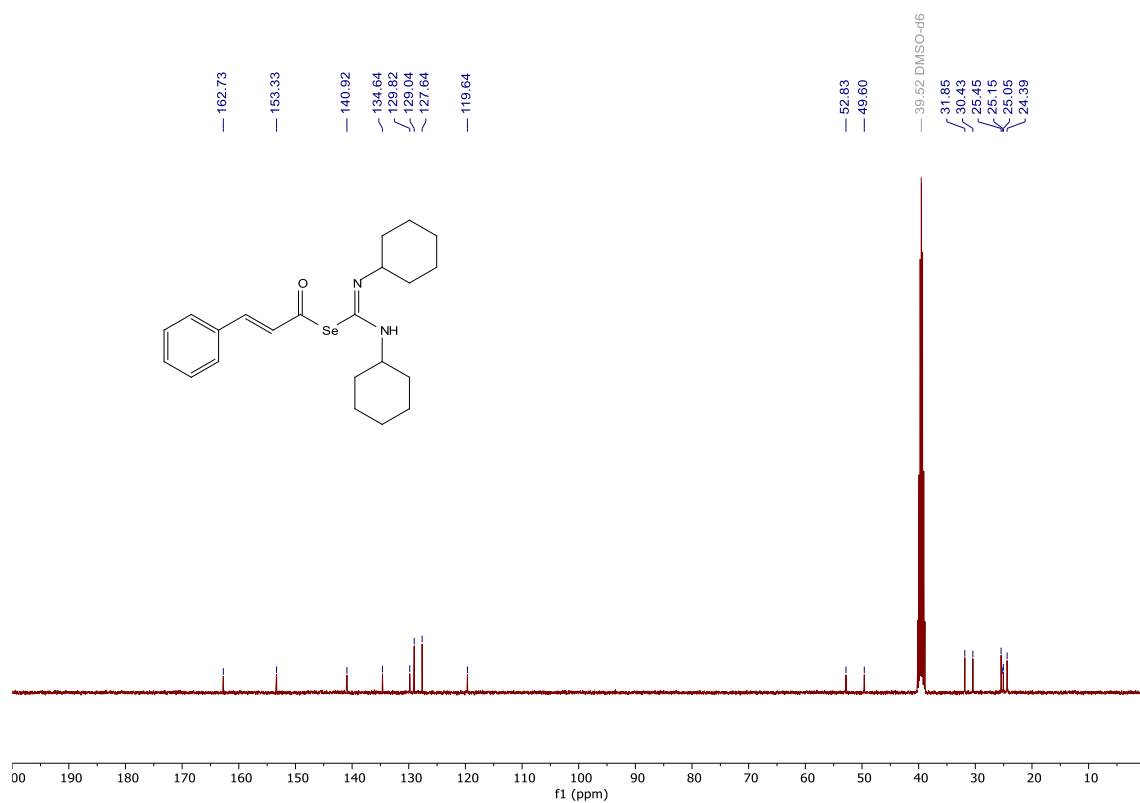

Figure S23. <sup>13</sup>C-NMR spectrum of compound 2.

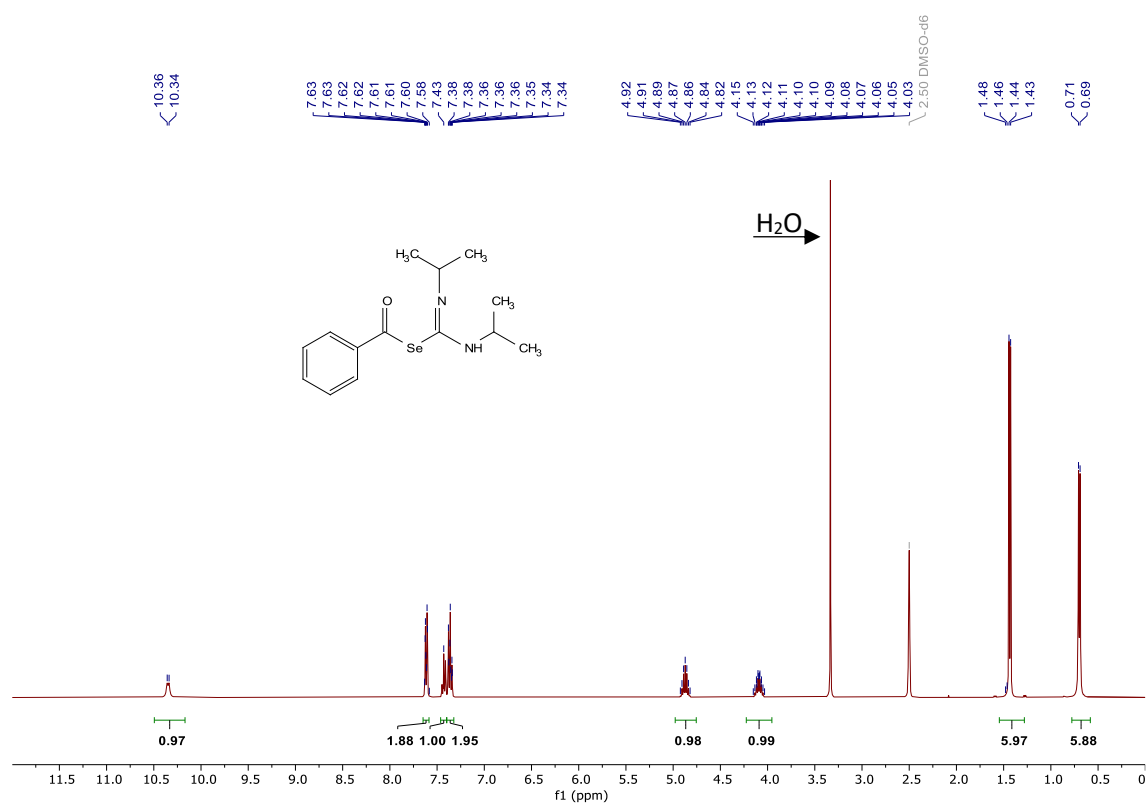

Figure S24. <sup>1</sup>H-NMR spectrum of compound 3.

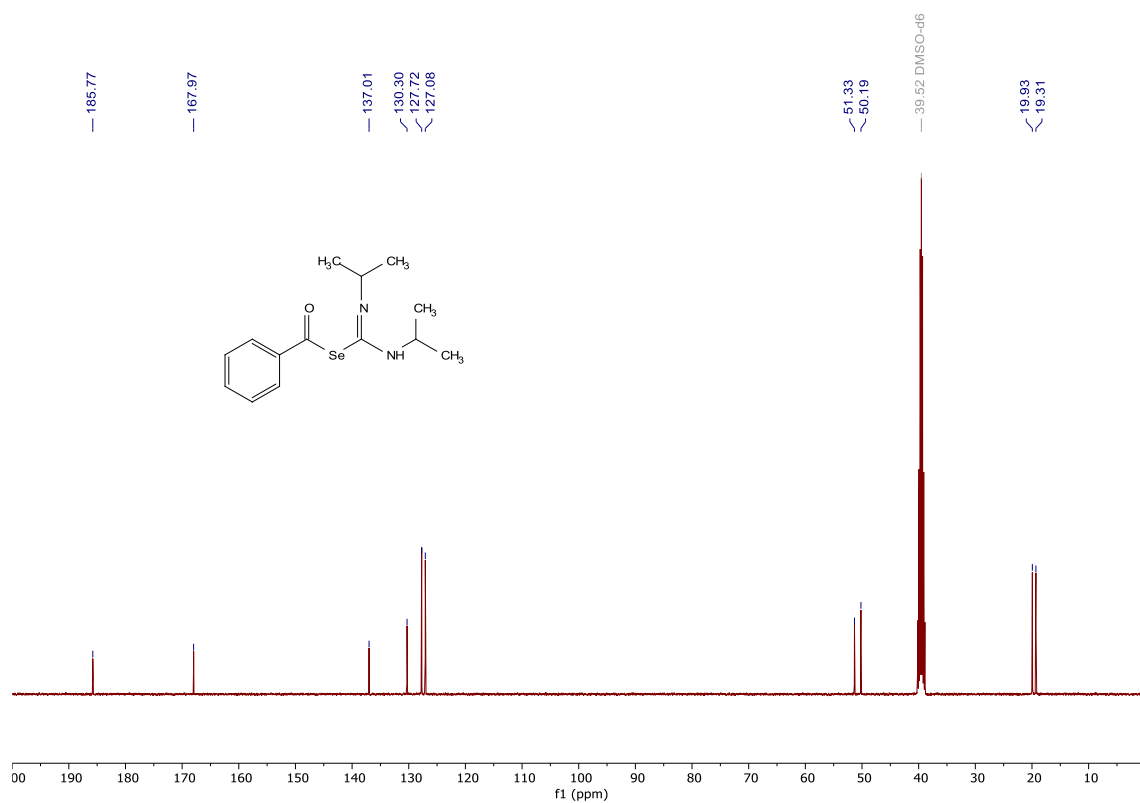

**Figure S25.** <sup>13</sup>C-NMR spectrum of compound 3.

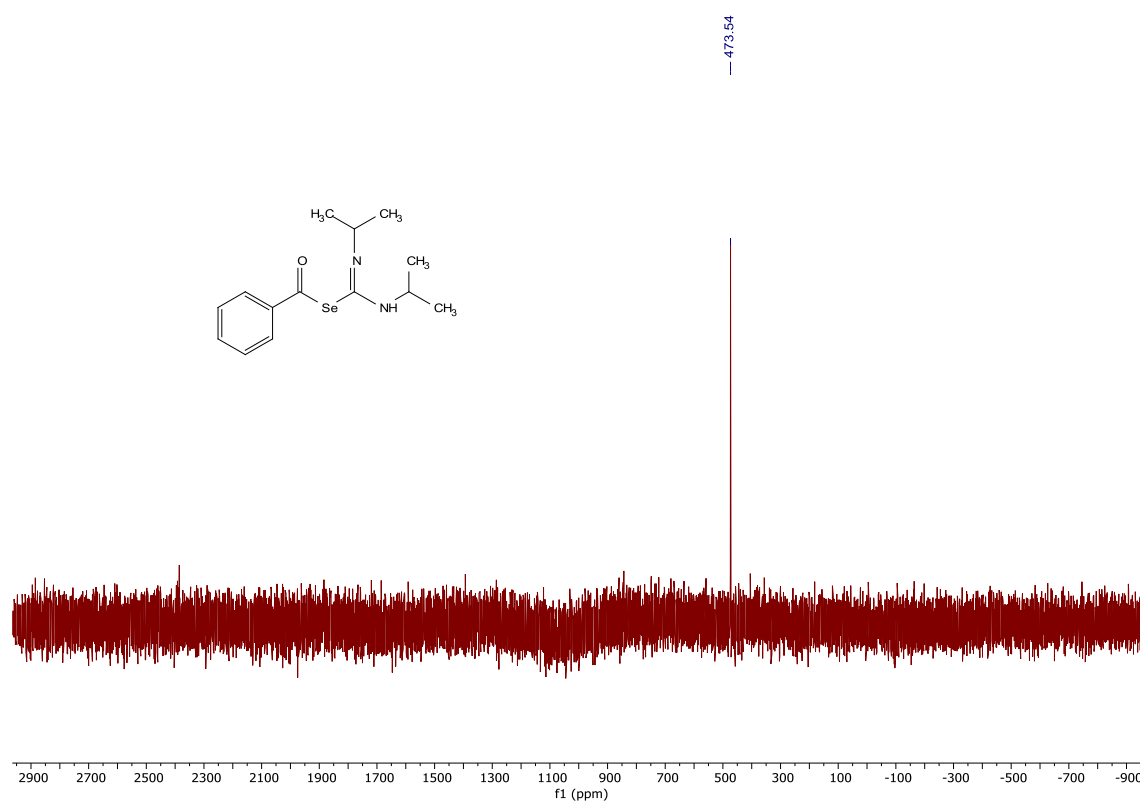

**Figure S26.** <sup>77</sup>Se-NMR spectrum of compound 3.

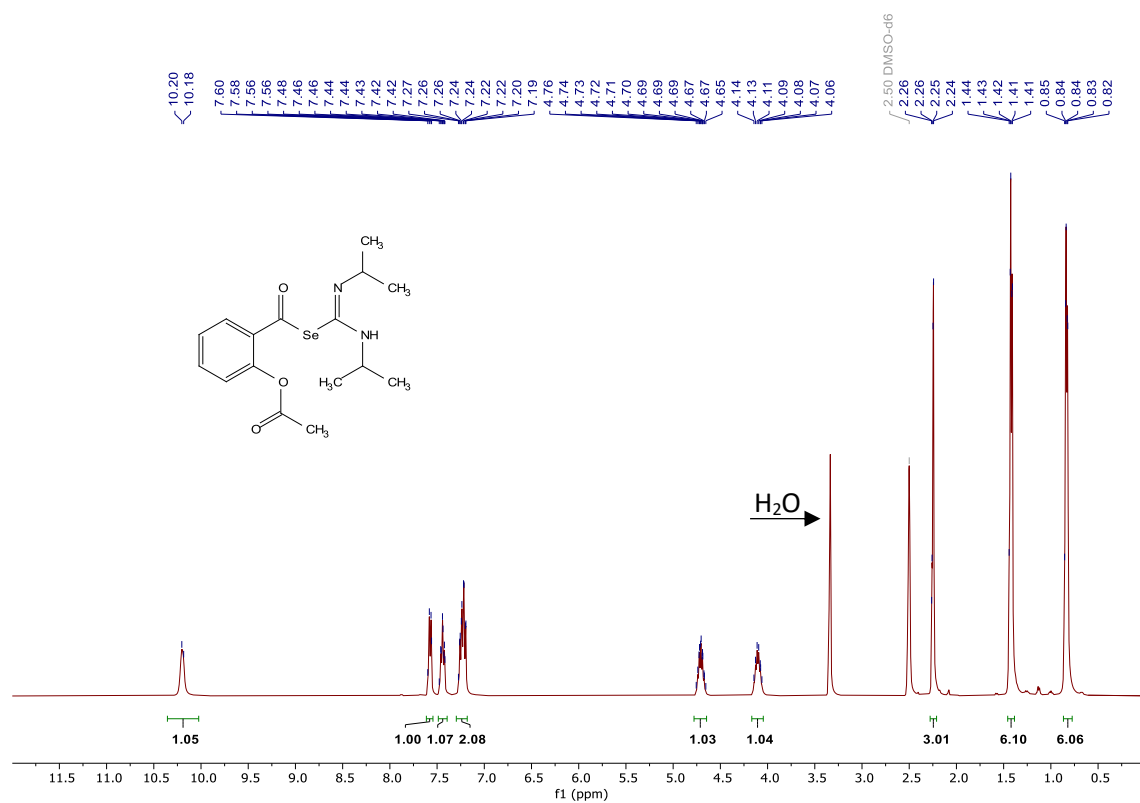

Figure S27. <sup>1</sup>H-NMR spectrum of compound 4.

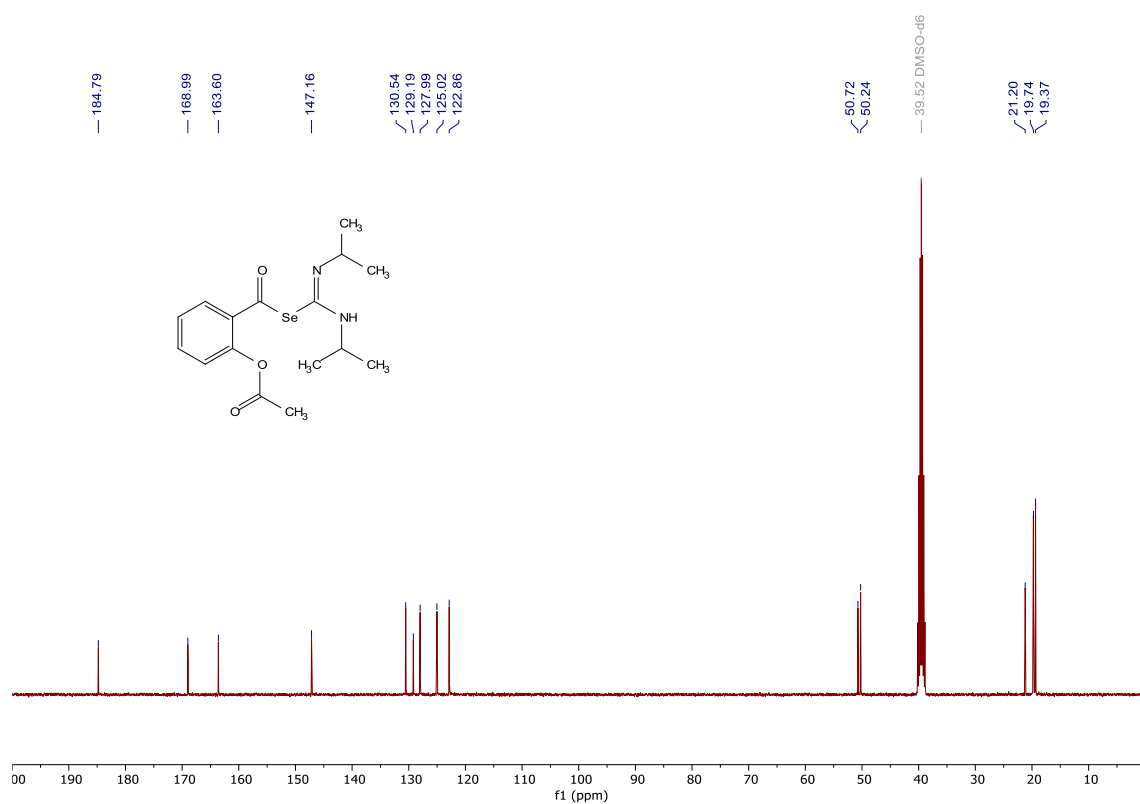

Figure S28. <sup>13</sup>C-NMR spectrum of compound 4.

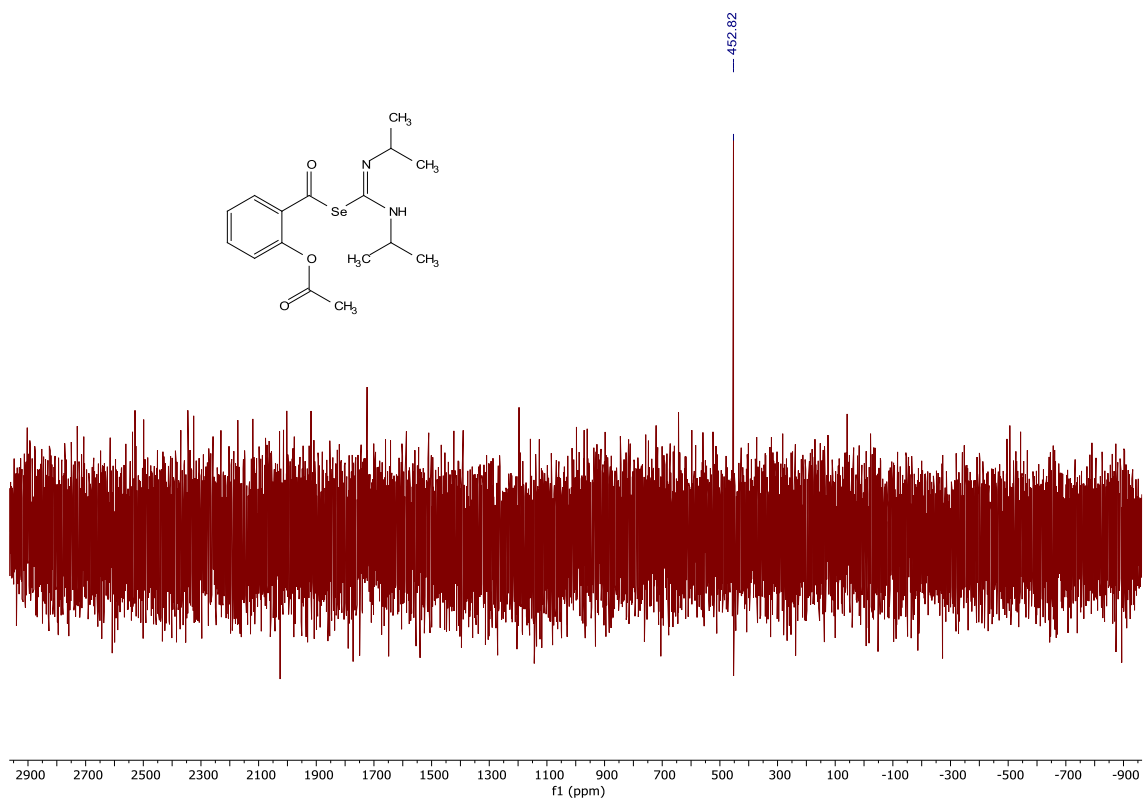

Figure S29. <sup>77</sup>Se-NMR spectrum of compound 4.

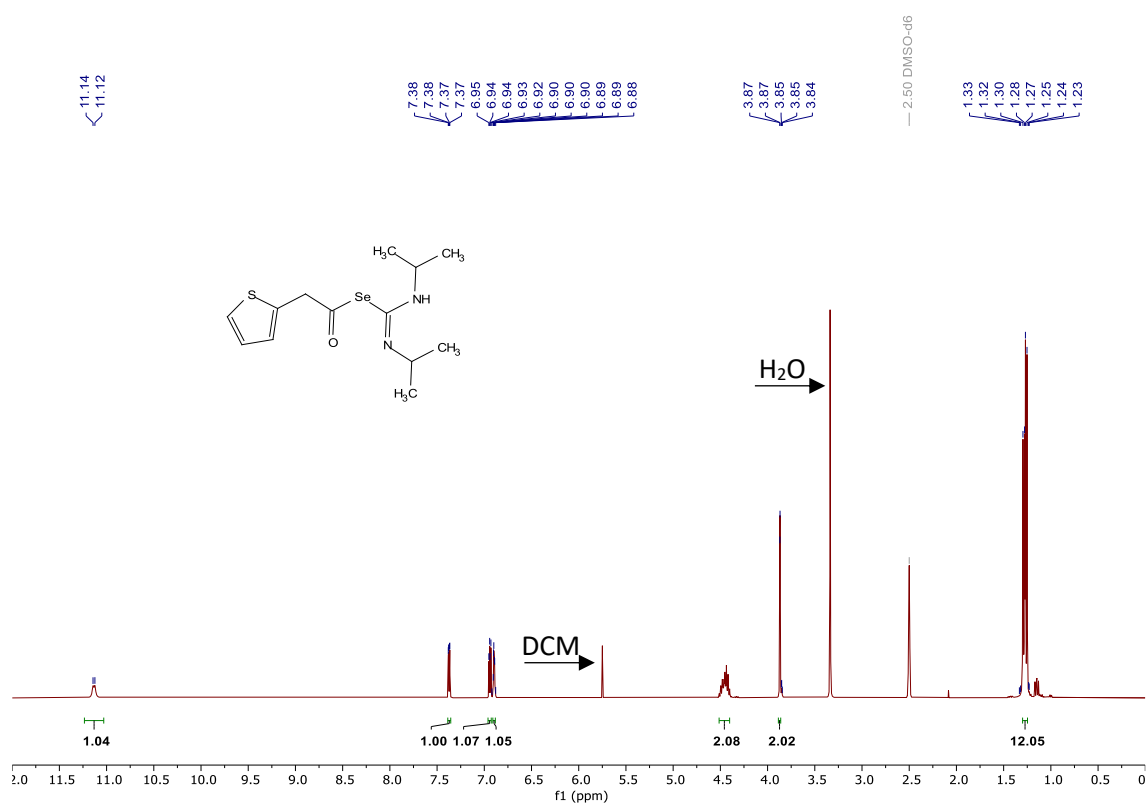

Figure S30. <sup>1</sup>H-NMR spectrum of compound 5.

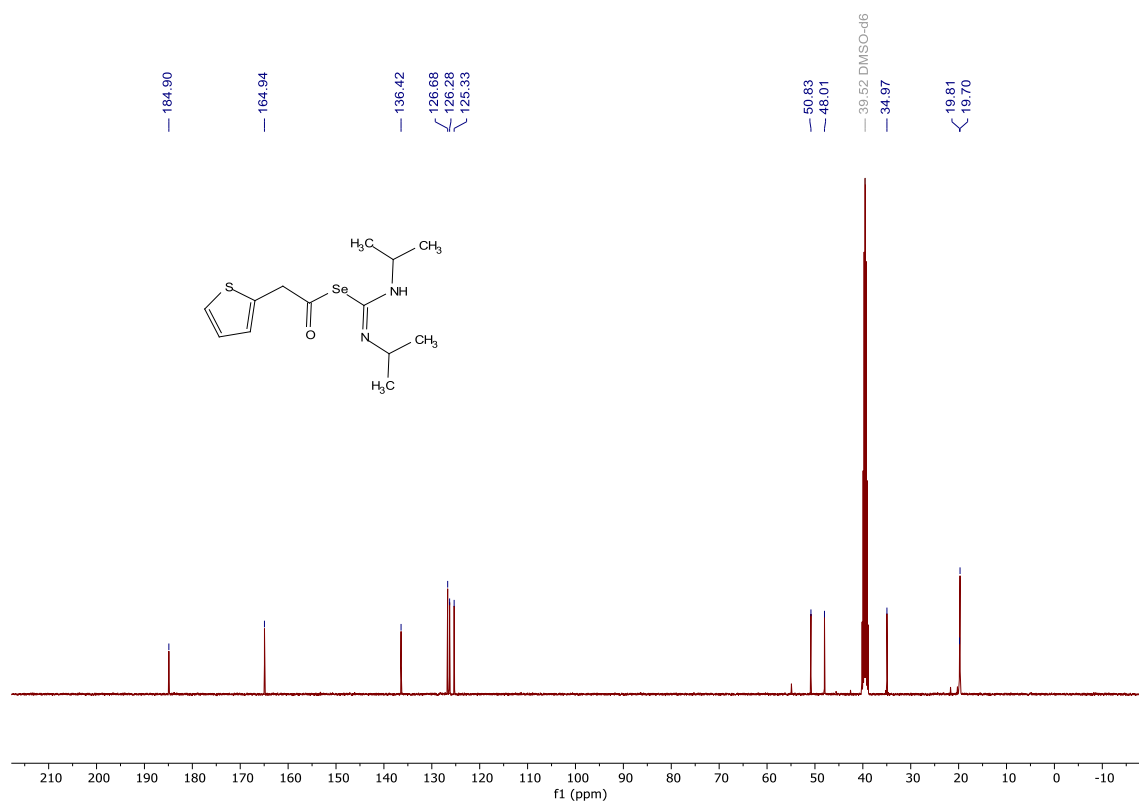

**Figure S31.** <sup>13</sup>C-NMR spectrum of compound 5.

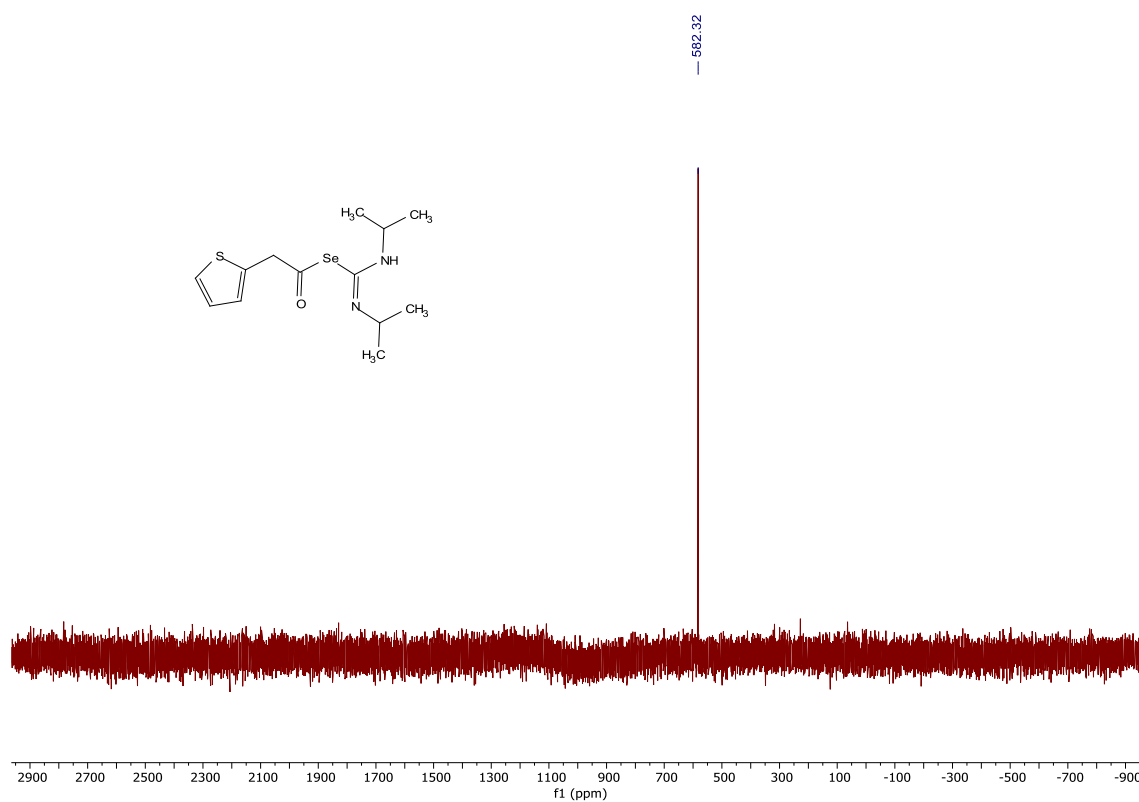

**Figure S32.** <sup>77</sup>Se-NMR spectrum of compound 5.

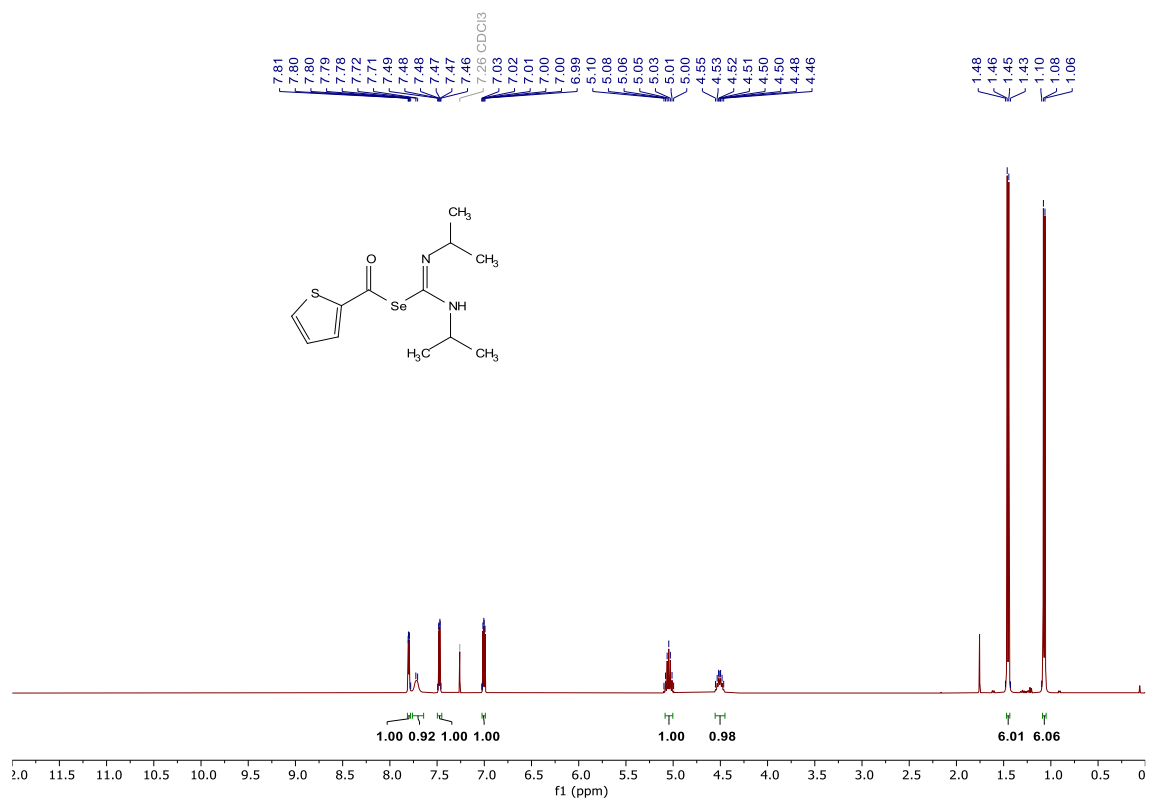

**Figure S33.** <sup>1</sup>H-NMR spectrum of compound 6.

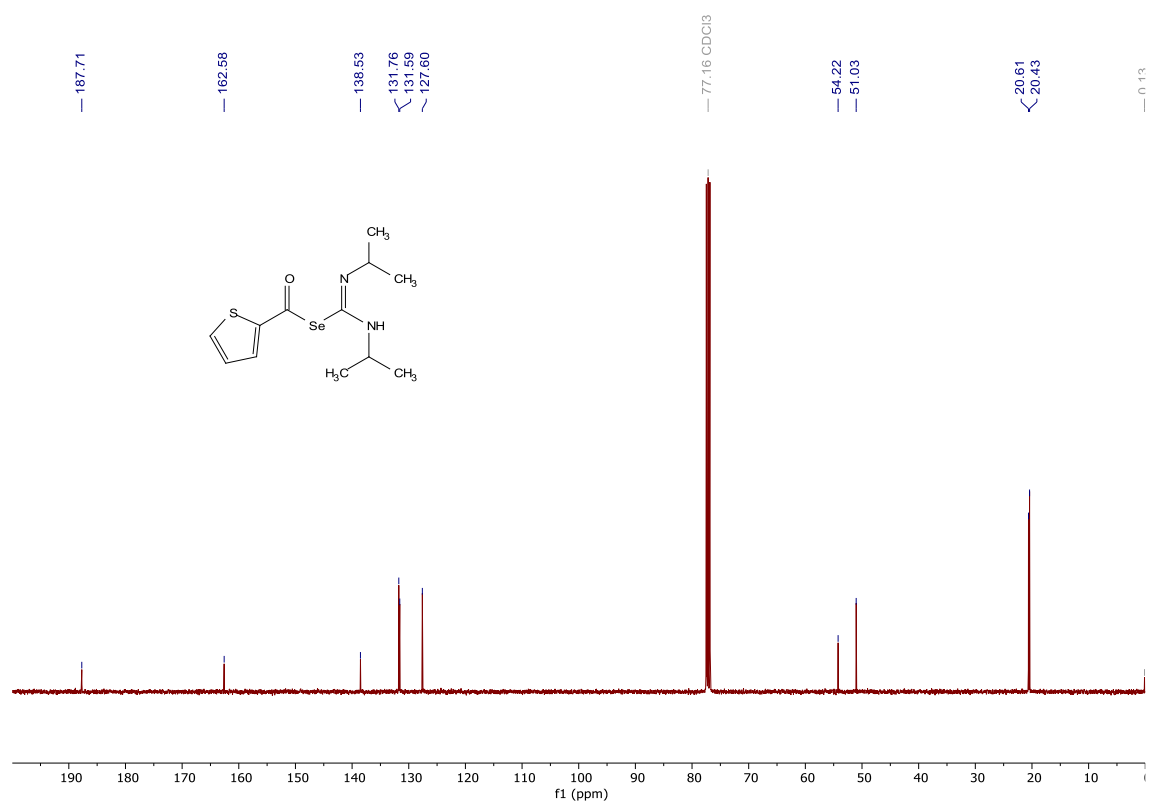

**Figure S34.** <sup>13</sup>C-NMR spectrum of compound 6.

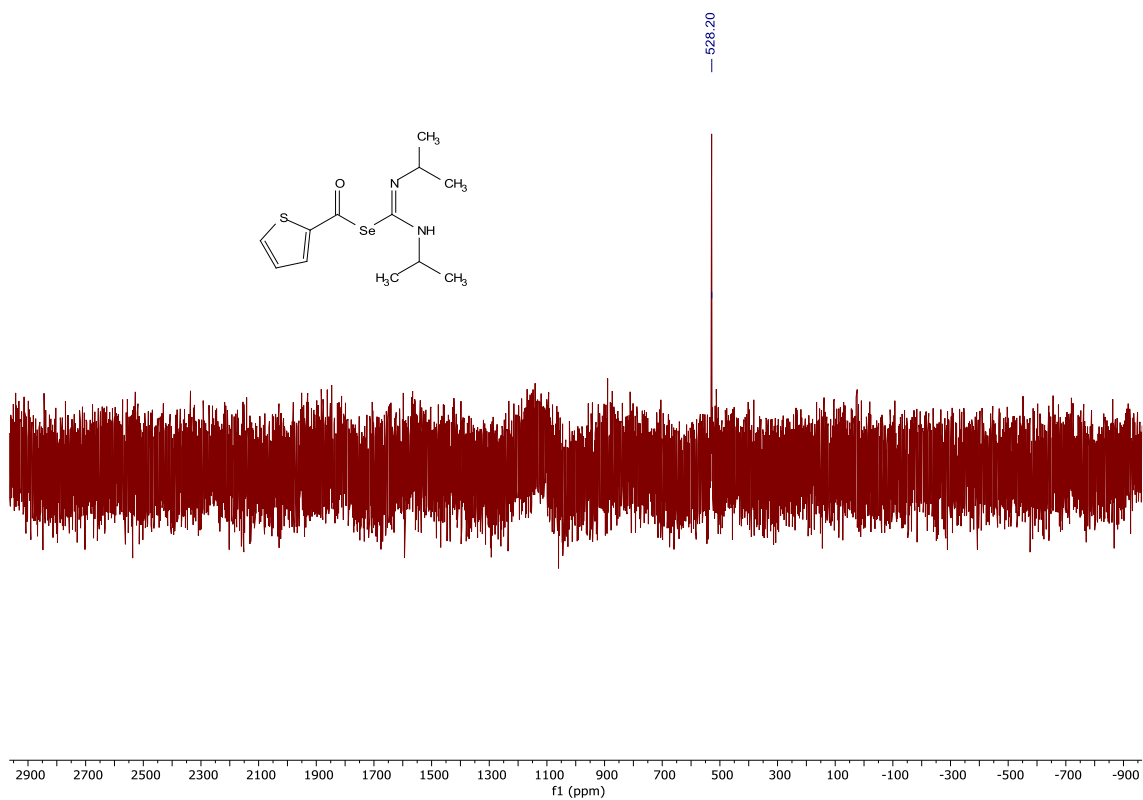

Figure S35. <sup>77</sup>Se-NMR spectrum of compound 6.

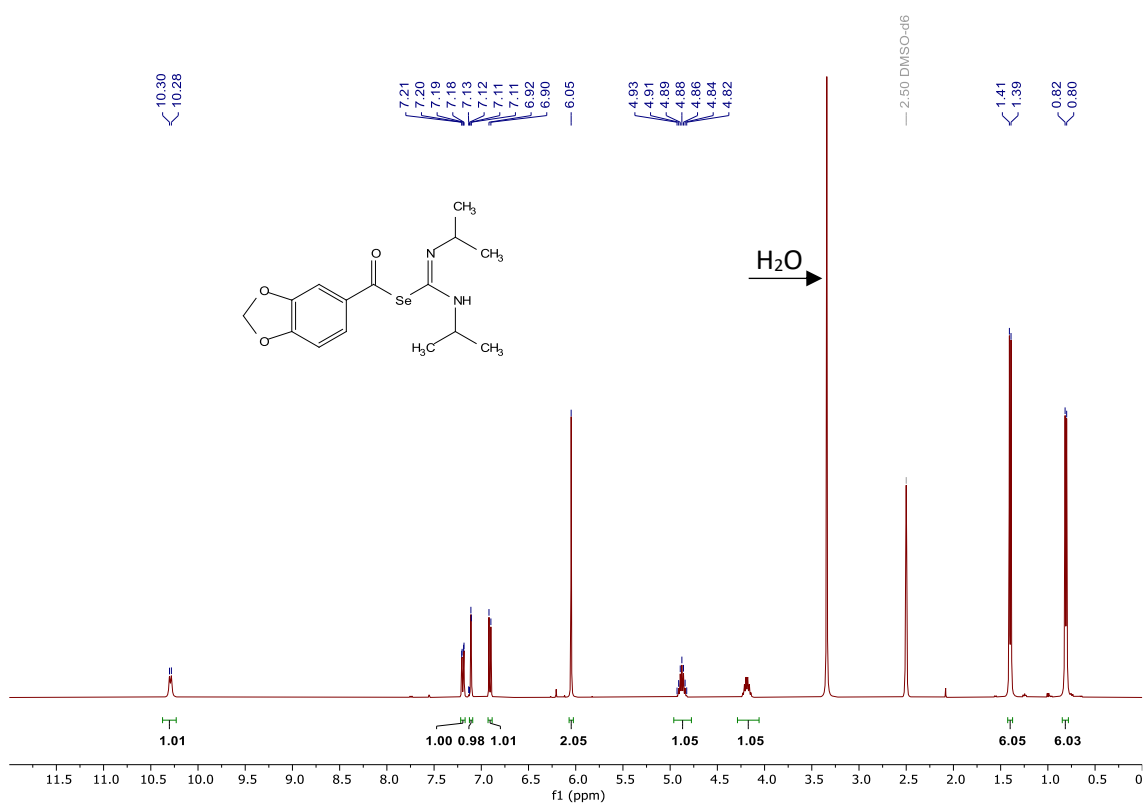

Figure S36. <sup>1</sup>H-NMR spectrum of compound 7.



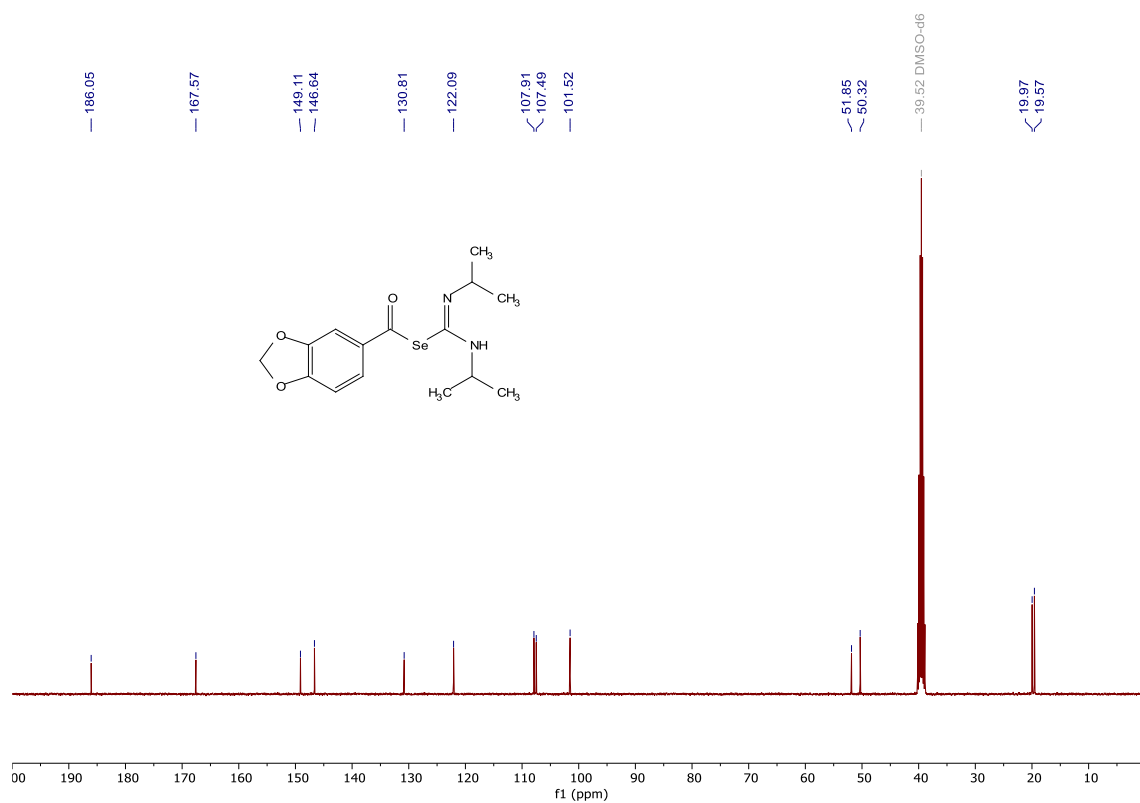

**Figure S37.** <sup>13</sup>C-NMR spectrum of compound 7.

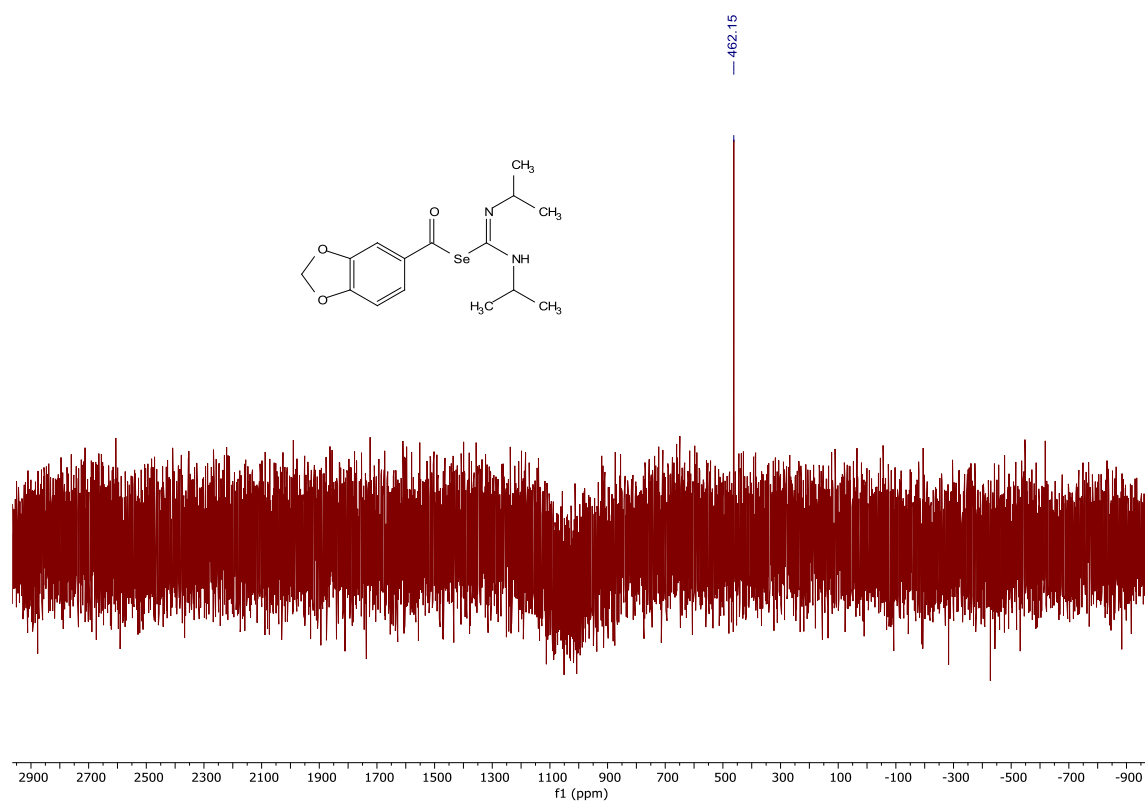

**Figure S38.** <sup>77</sup>Se-NMR spectrum of compound 7.

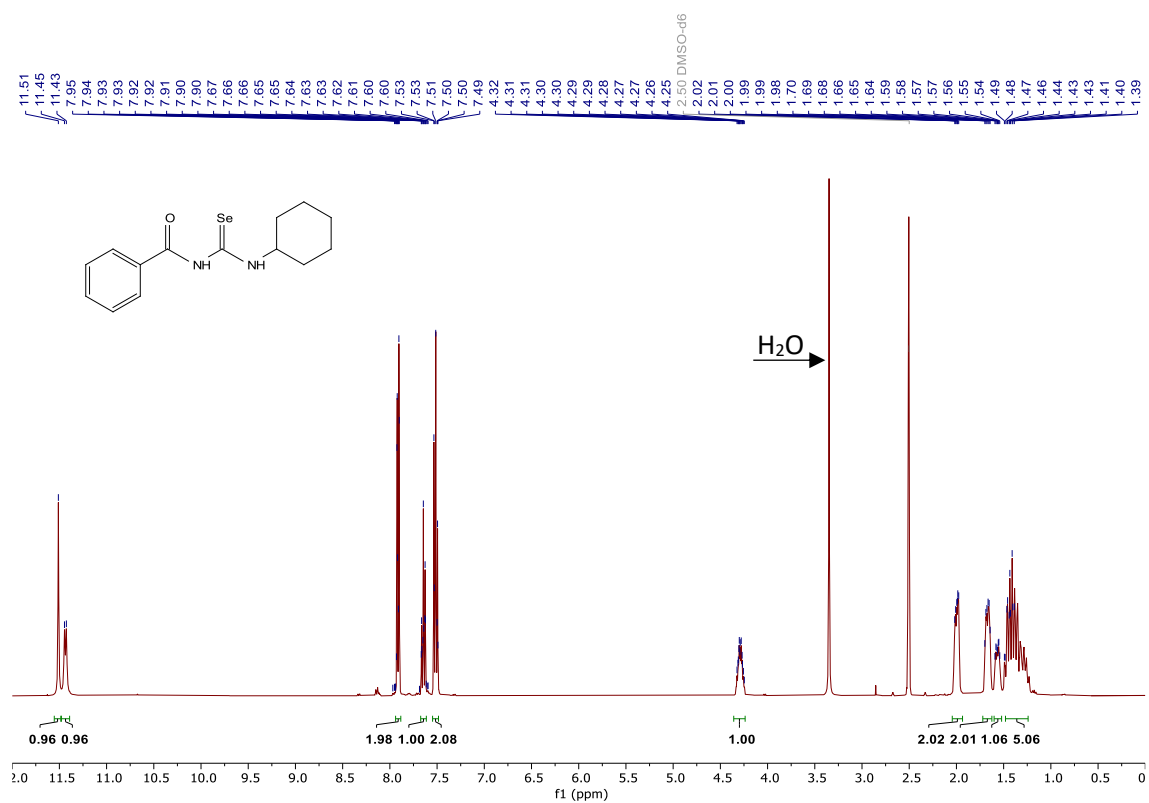

Figure S39. <sup>1</sup>H-NMR spectrum of compound 8.

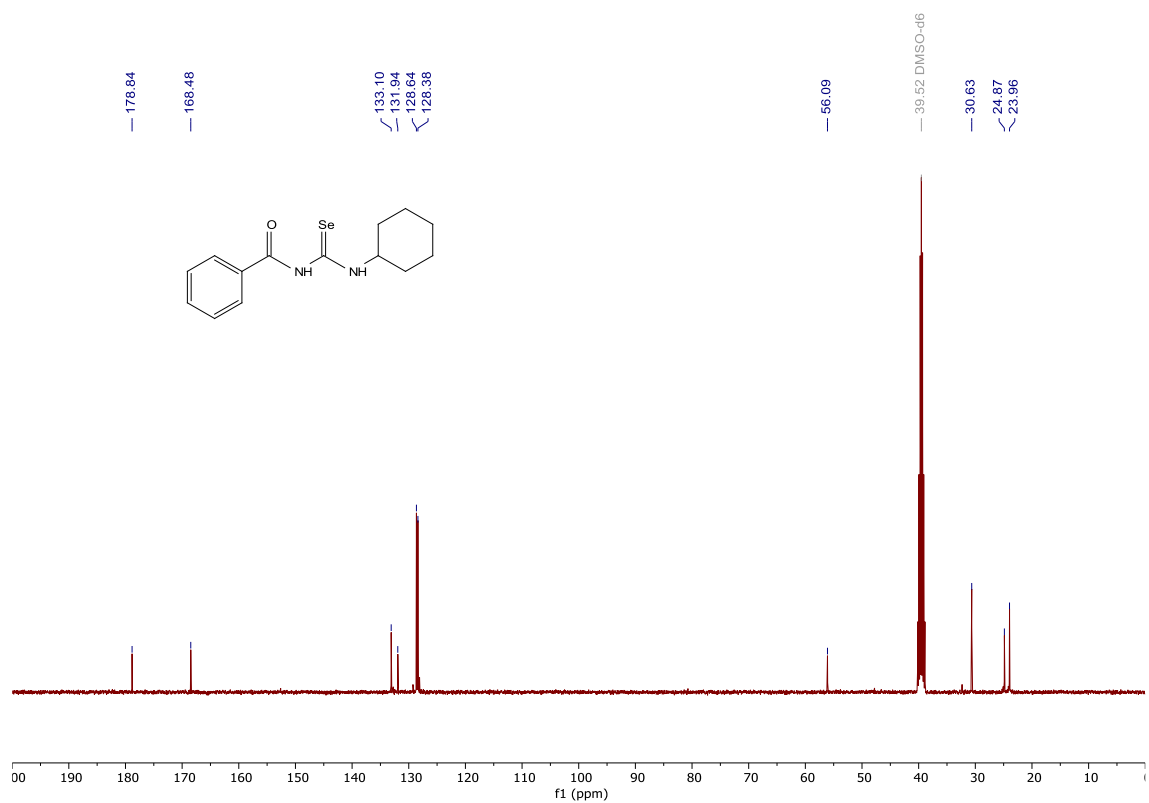

Figure S40. <sup>13</sup>C-NMR spectrum of compound 8.

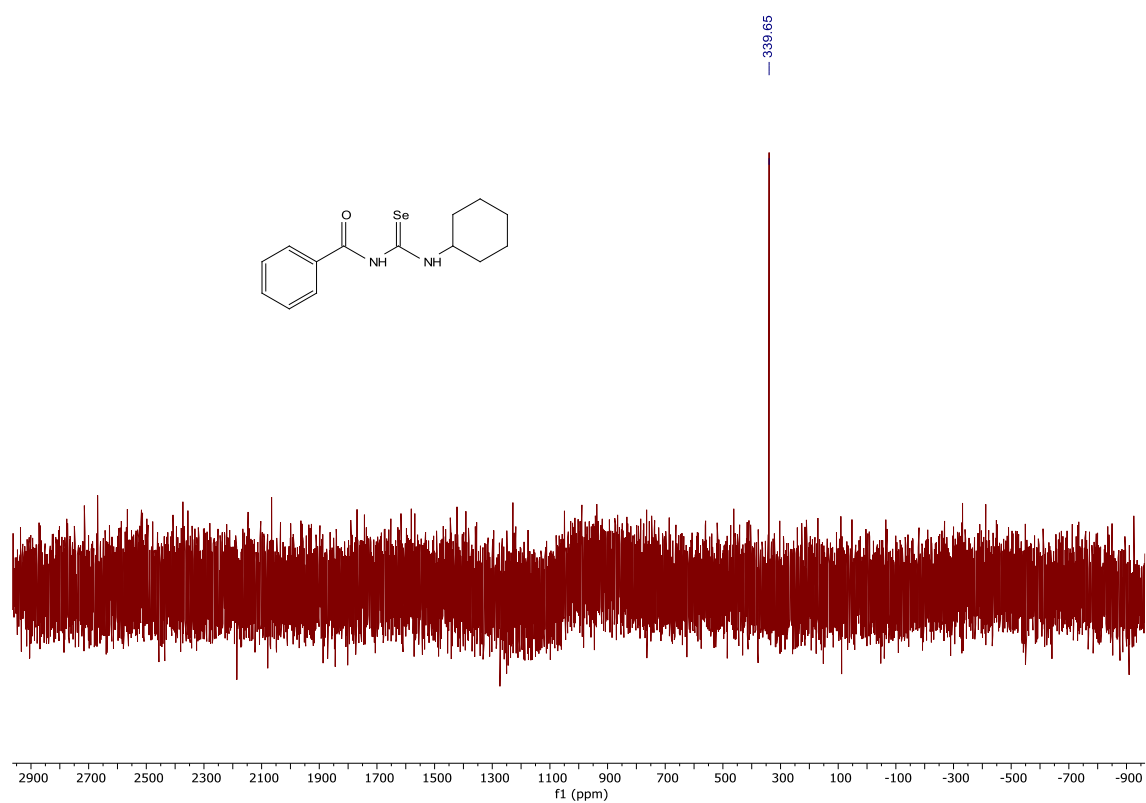

Figure S41. <sup>77</sup>Se-NMR spectrum of compound 8.

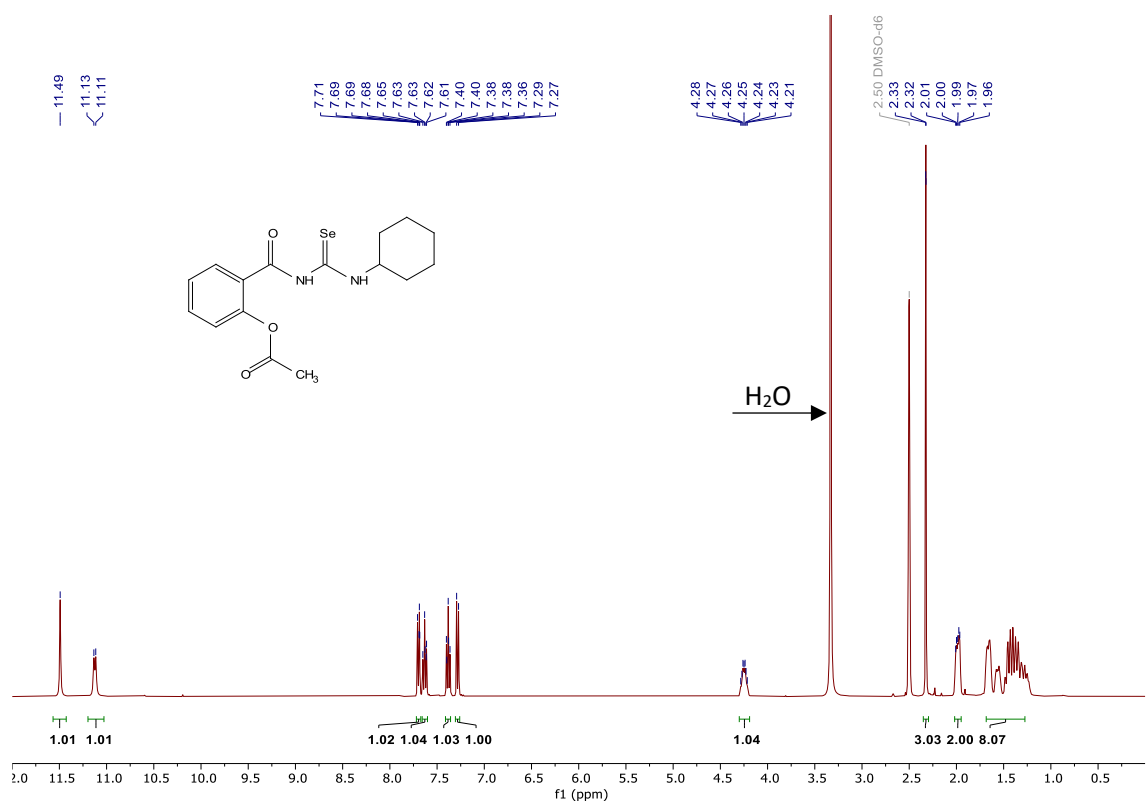

Figure S42. <sup>1</sup>H-NMR spectrum of compound 9.

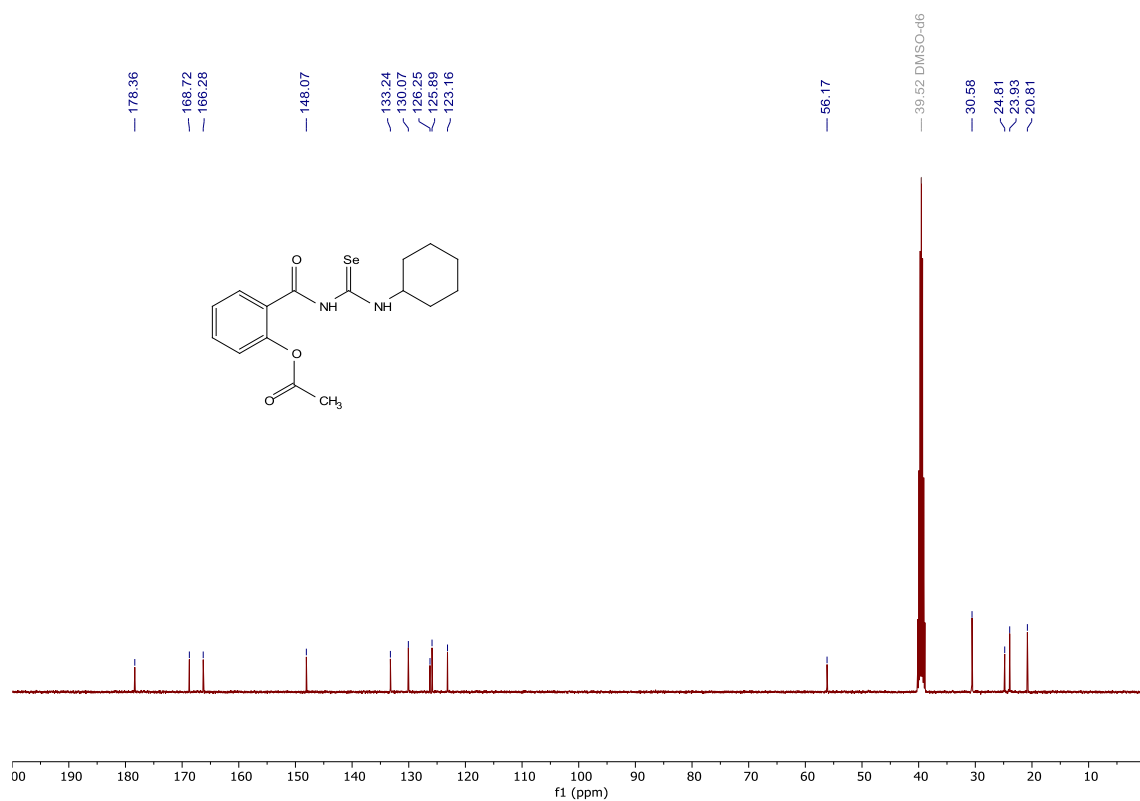

**Figure S43.** <sup>13</sup>C-NMR spectrum of compound 9.

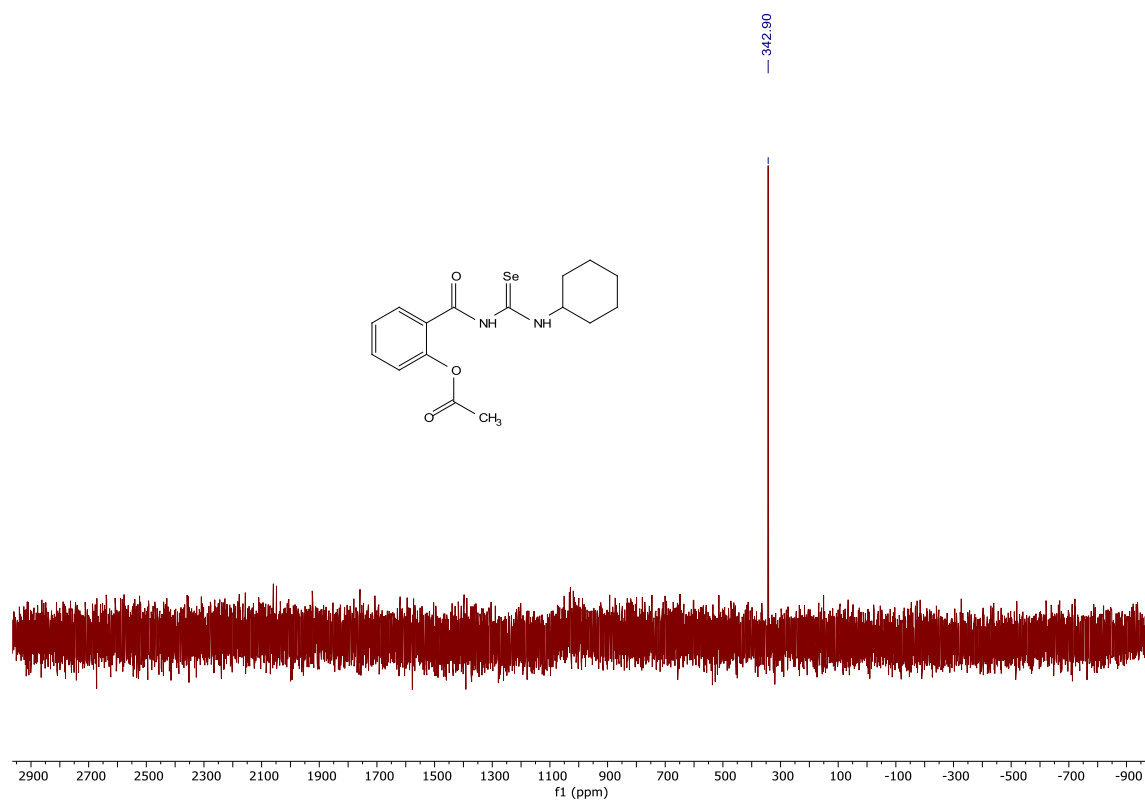

**Figure S44.** <sup>77</sup>Se-NMR spectrum of compound 9.

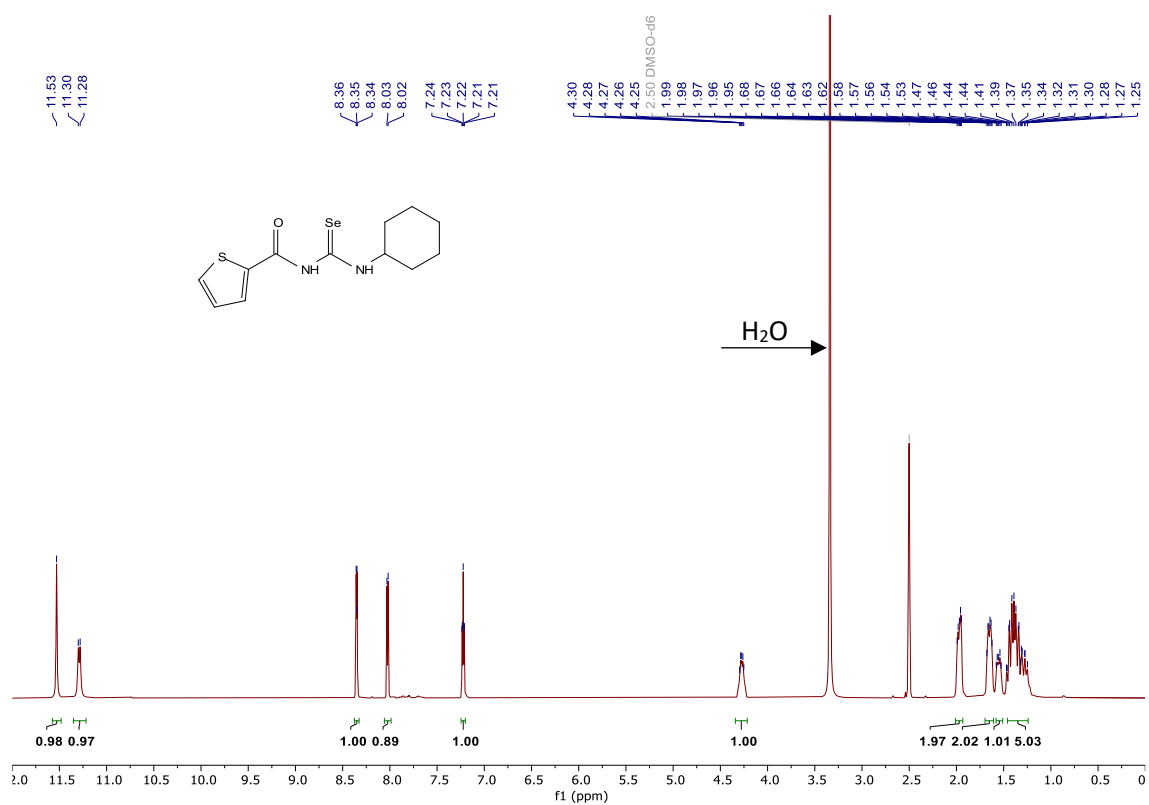

Figure S45. <sup>1</sup>H-NMR spectrum of compound 10.

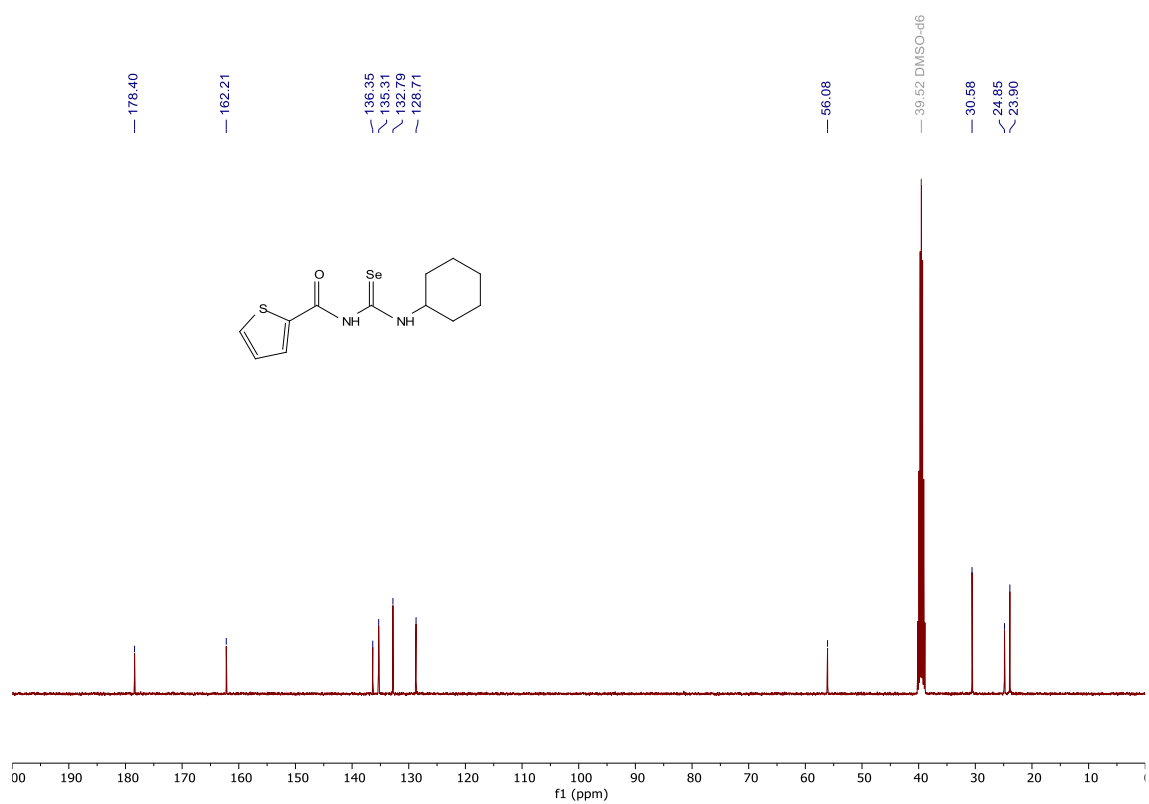

Figure S46. <sup>13</sup>C-NMR spectrum of compound 10.

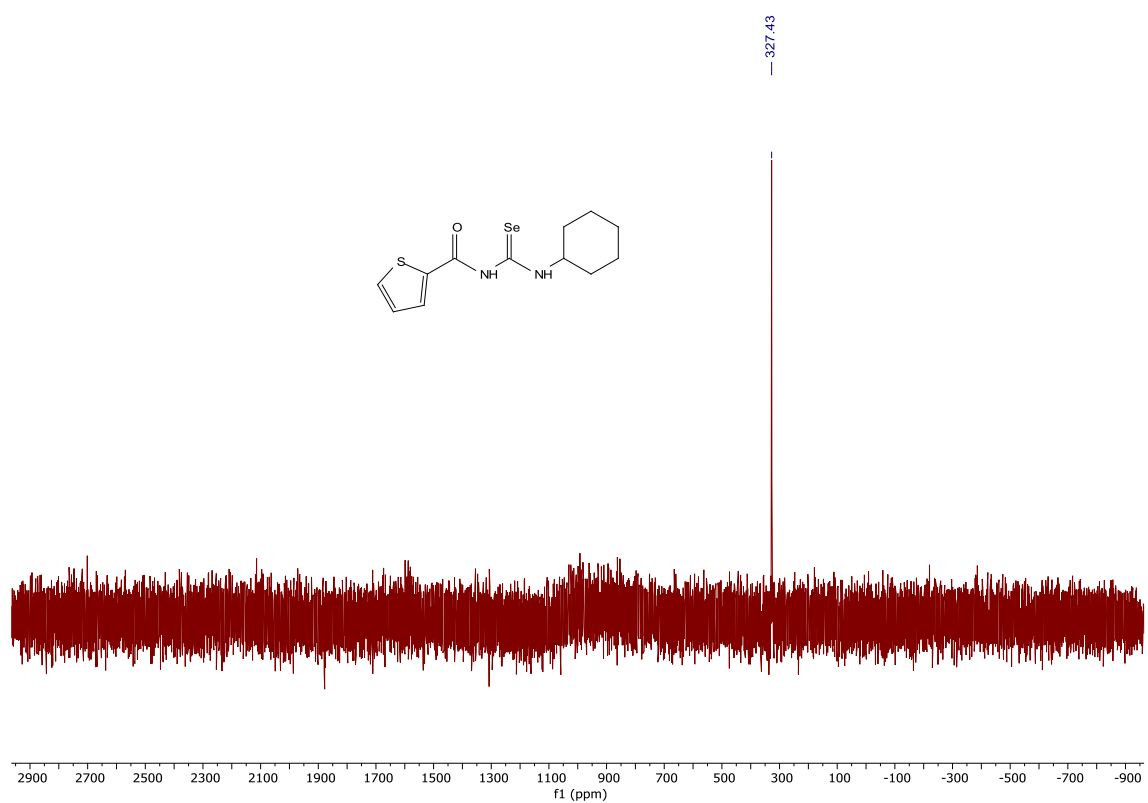

Figure S47. <sup>77</sup>Se-NMR spectrum of compound 10.

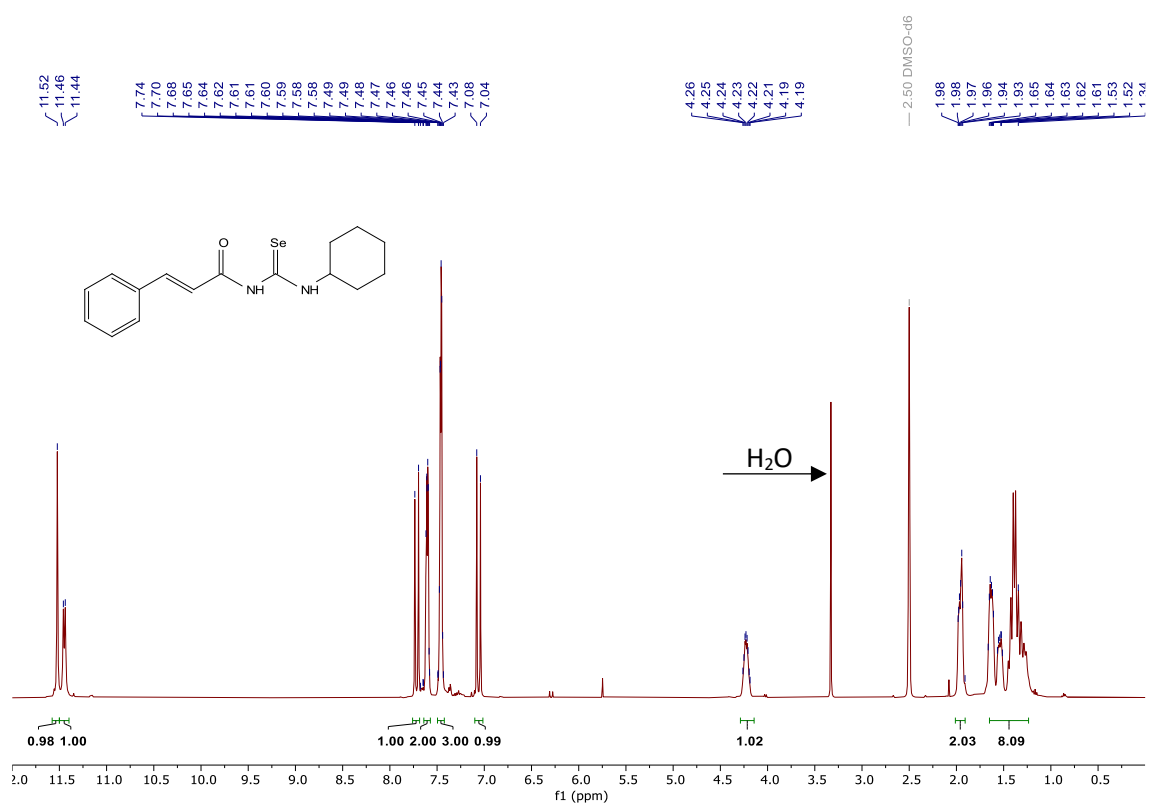

Figure S48. <sup>1</sup>H-NMR spectrum of compound 11.

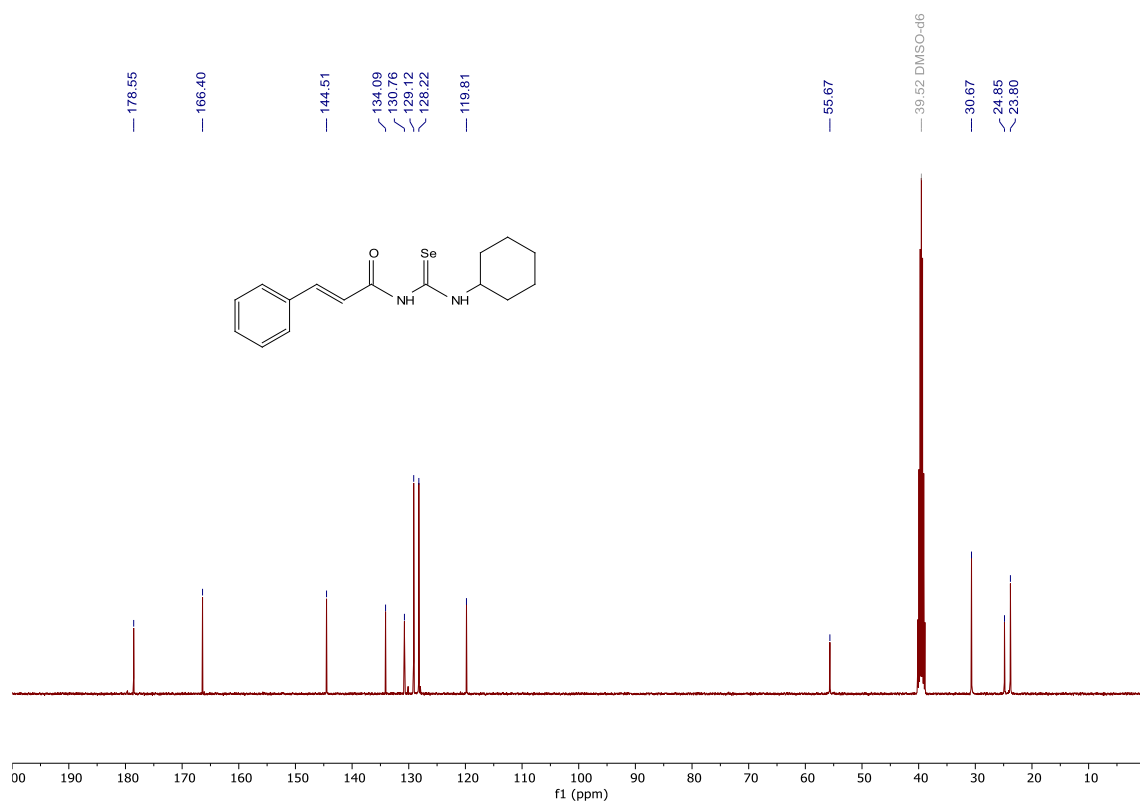

**Figure S49.** <sup>13</sup>C-NMR spectrum of compound **11**.

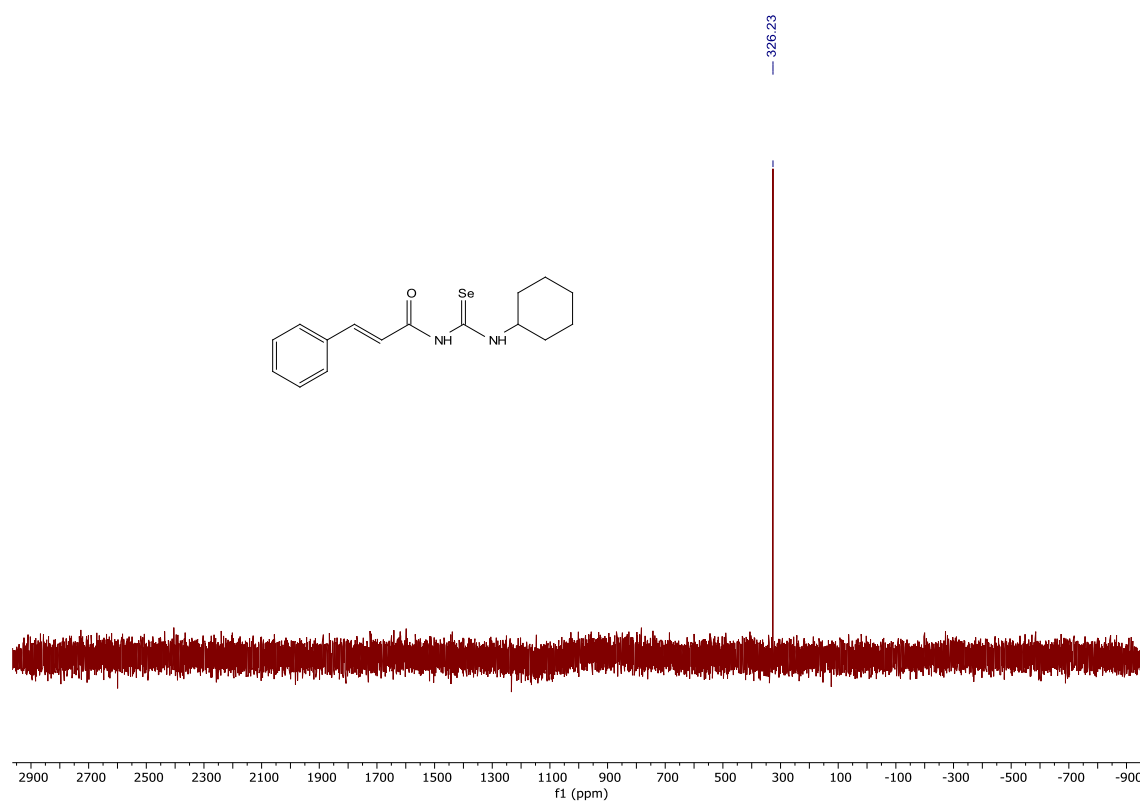

**Figure S50.** <sup>77</sup>Se-NMR spectrum of compound **11**.

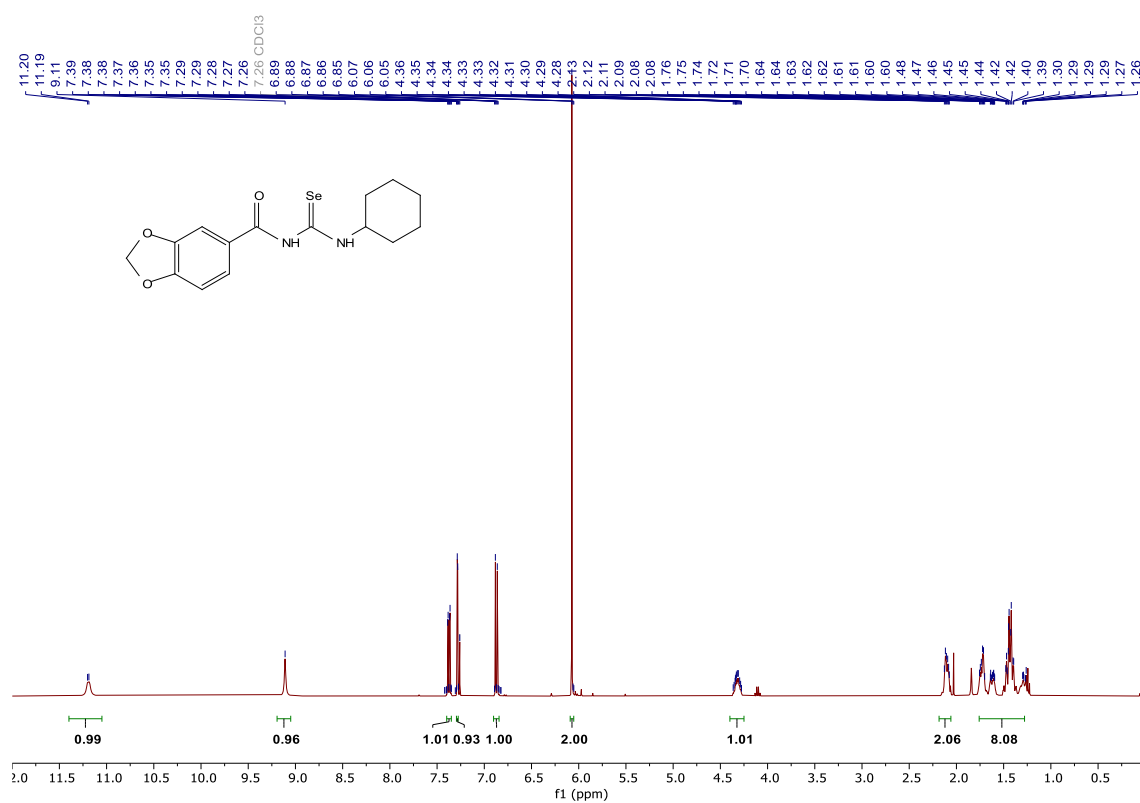

**Figure S51.** <sup>1</sup>H-NMR spectrum of compound **12**.

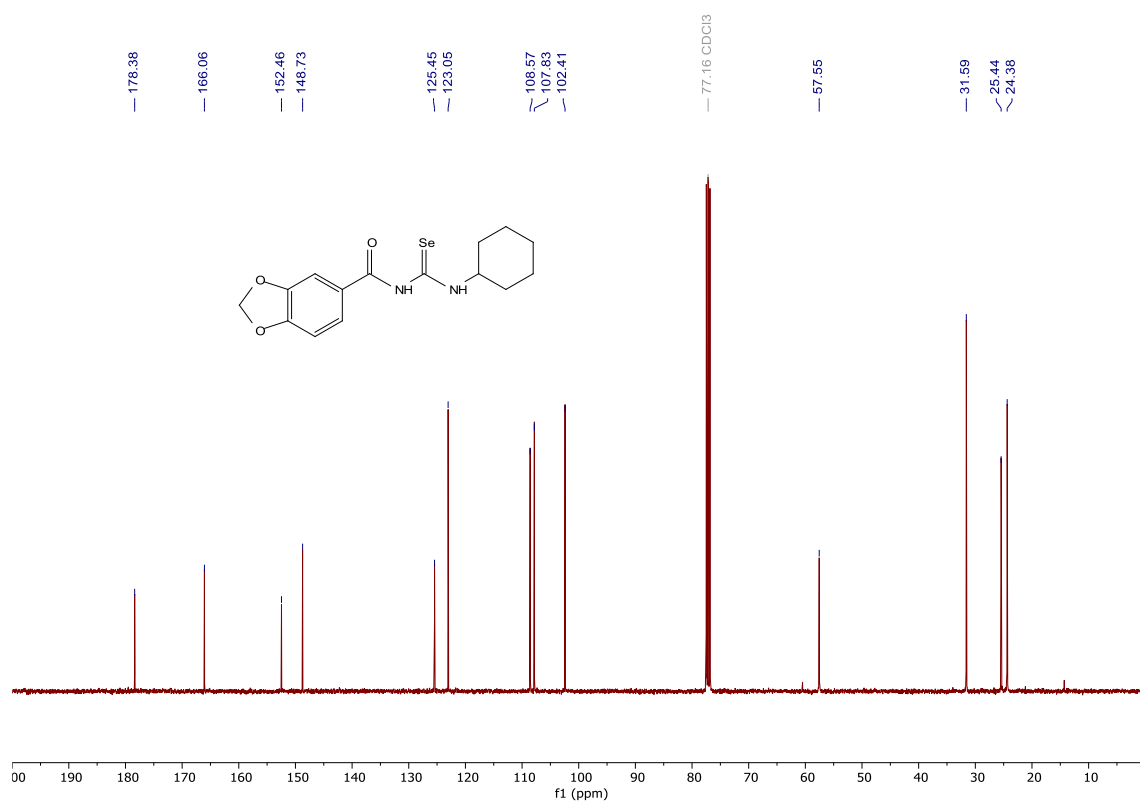

**Figure S52.** <sup>13</sup>C-NMR spectrum of compound **12**.





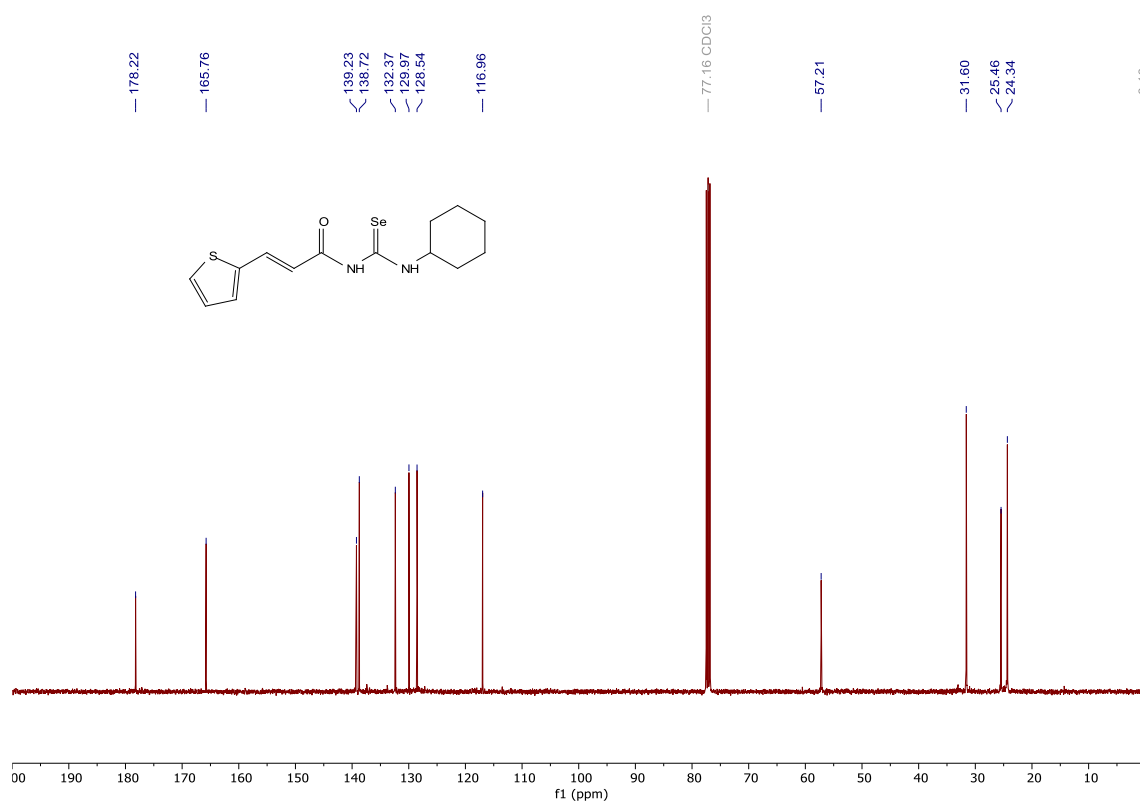

**Figure S55.** <sup>13</sup>C-NMR spectrum of compound **13**.

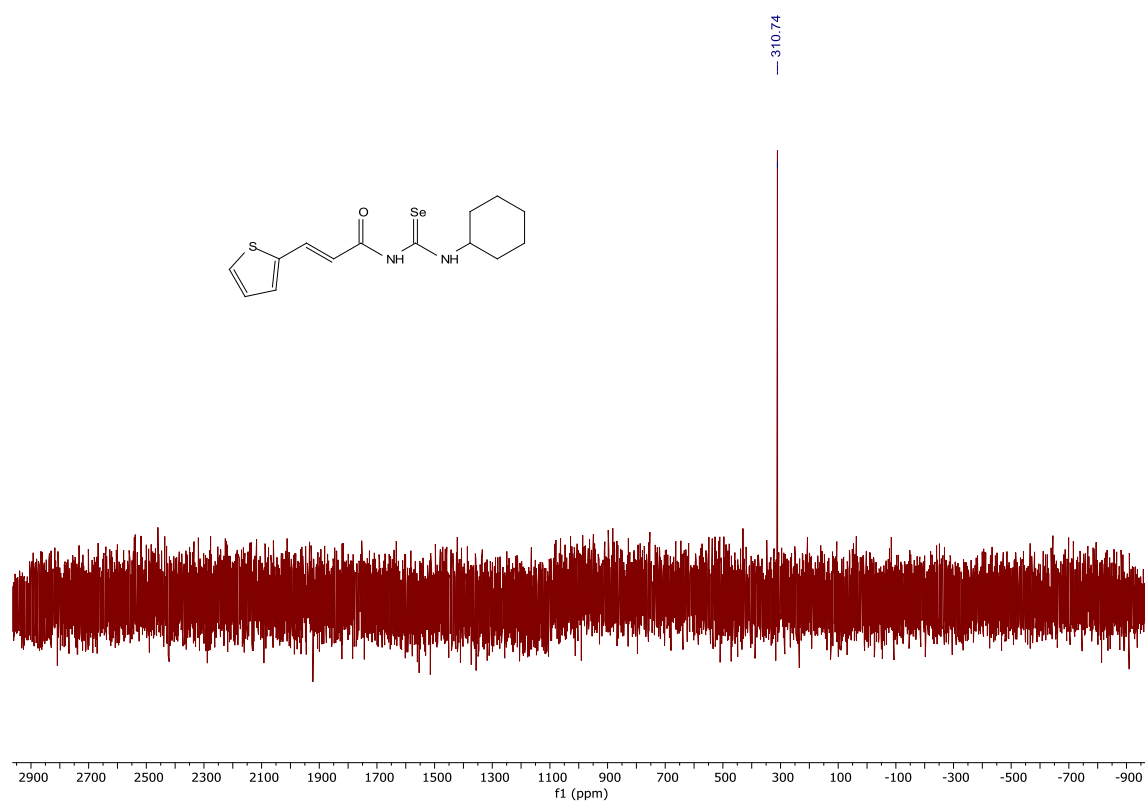

**Figure S56.** <sup>77</sup>Se-NMR spectrum of compound **13**.

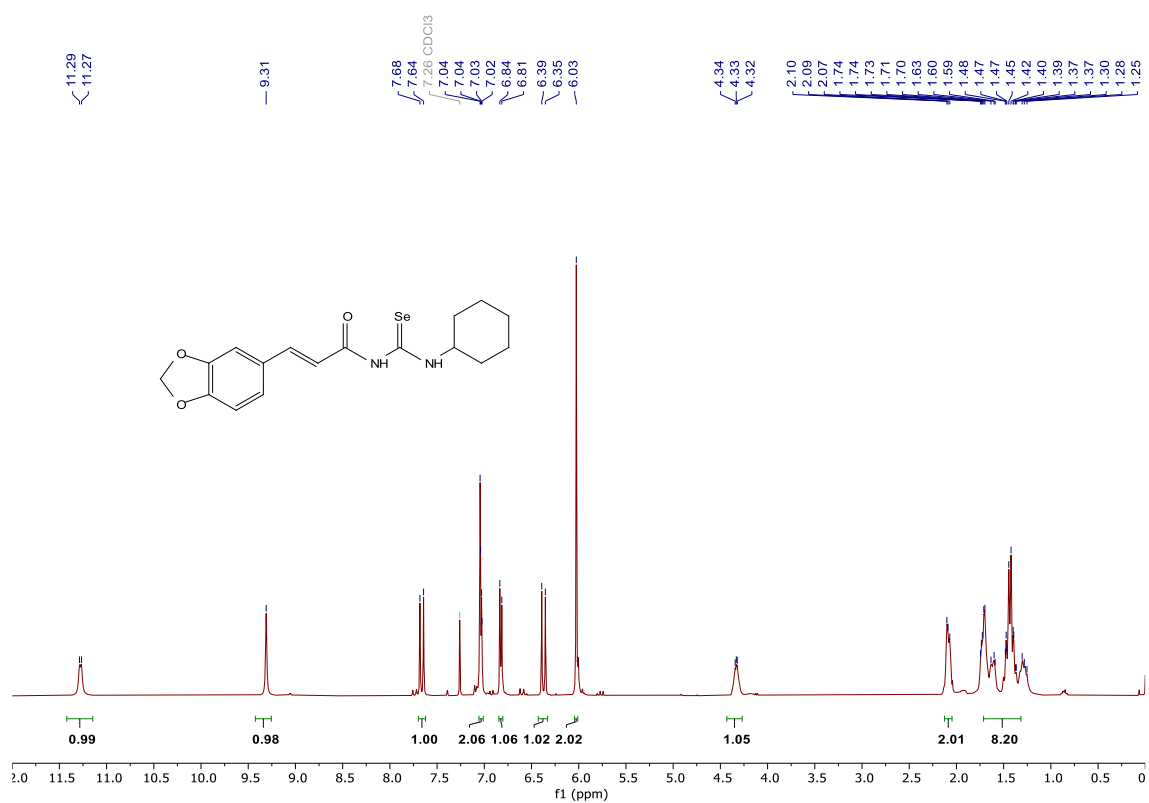

Figure S57. <sup>1</sup>H-NMR spectrum of compound 14.

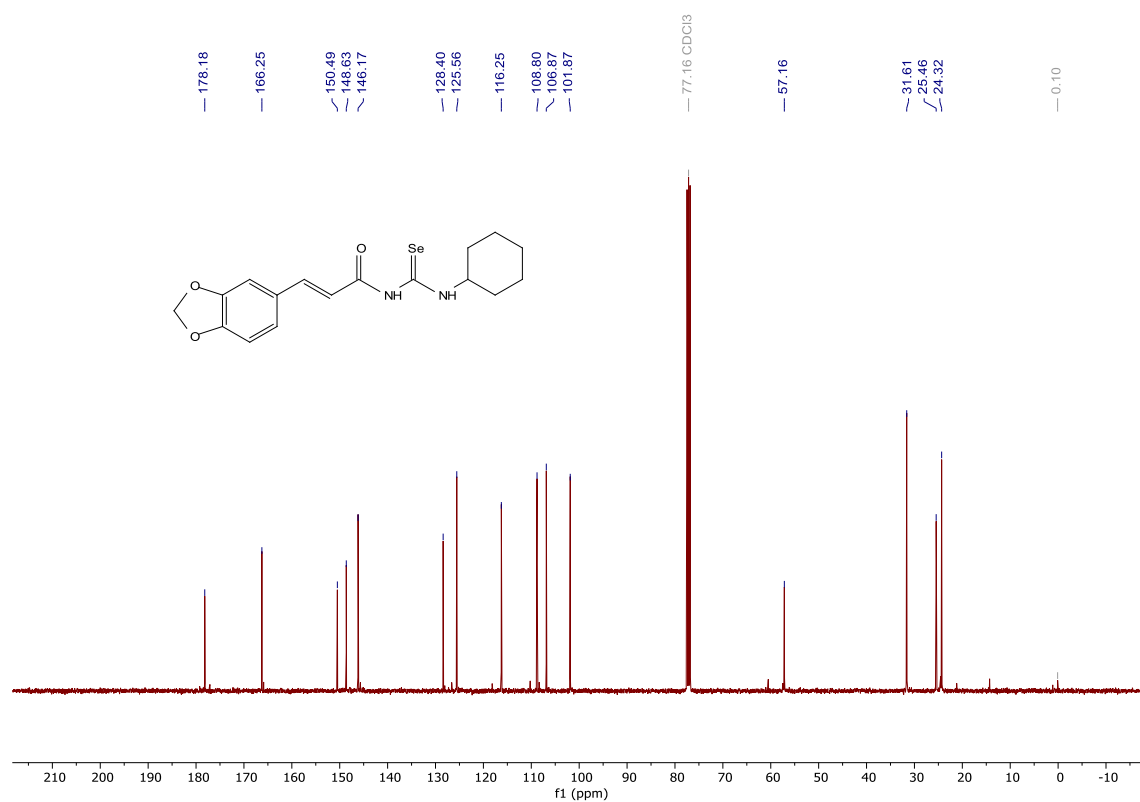

Figure S58. <sup>13</sup>C-NMR spectrum of compound 14.

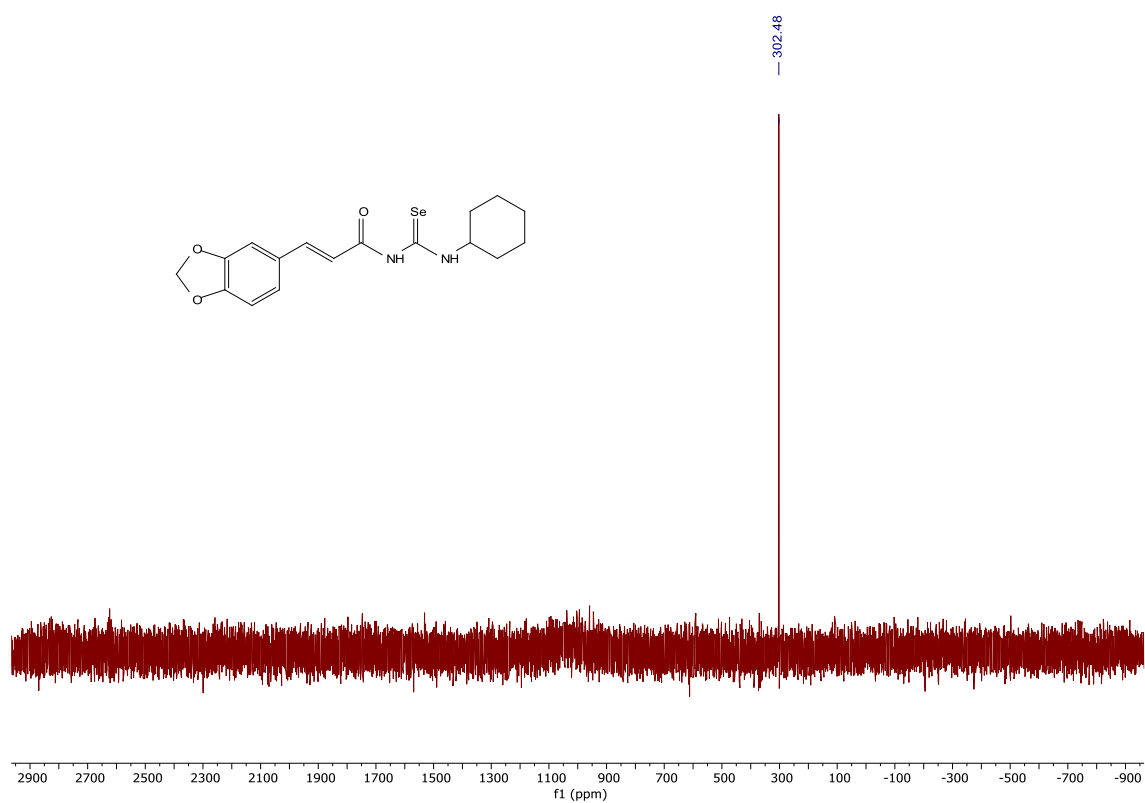

Figure S59.  $^{77}\text{Se}$ -NMR spectrum of compound 14.

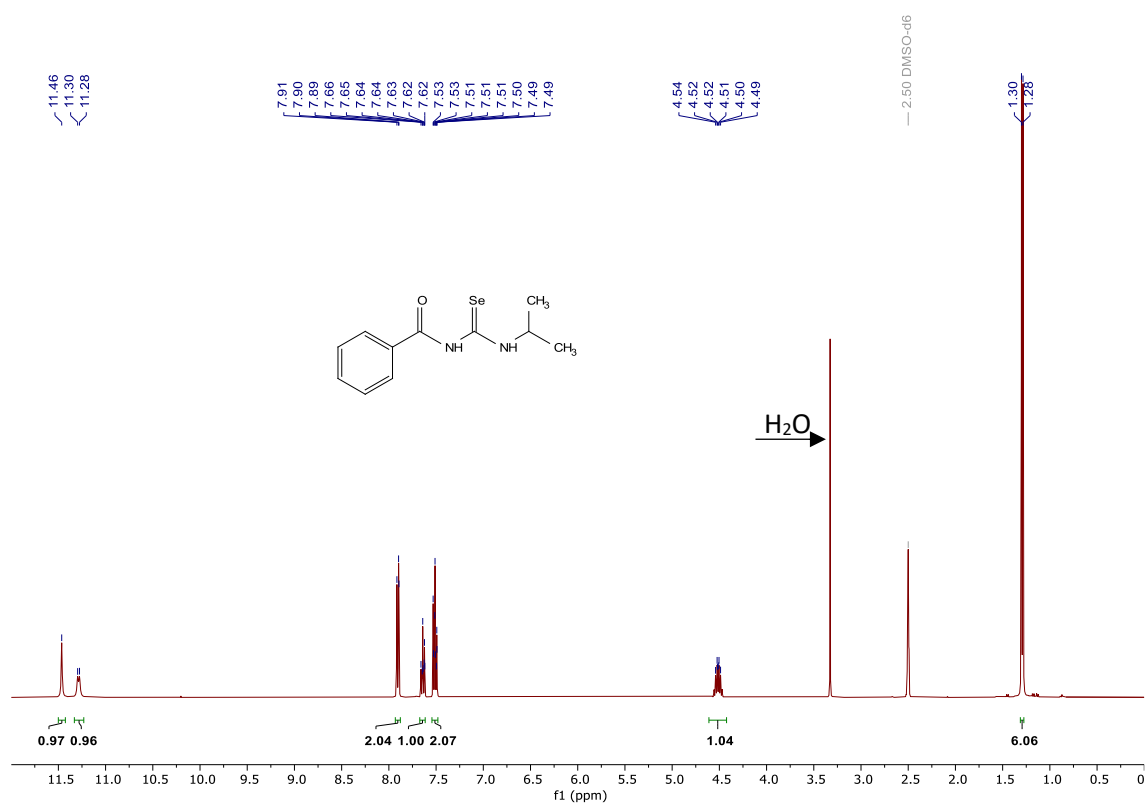

Figure S60.  $^1\text{H}$ -NMR spectrum of compound 15.

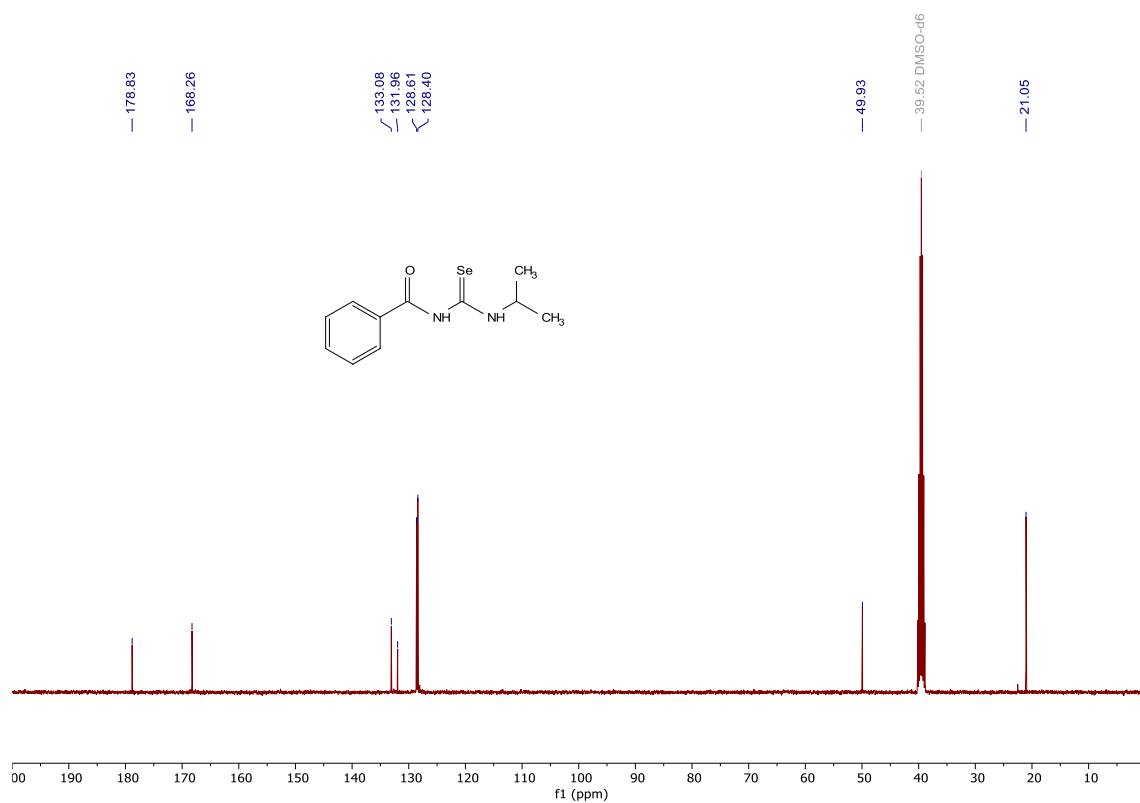

**Figure S61.** <sup>13</sup>C-NMR spectrum of compound **15**.

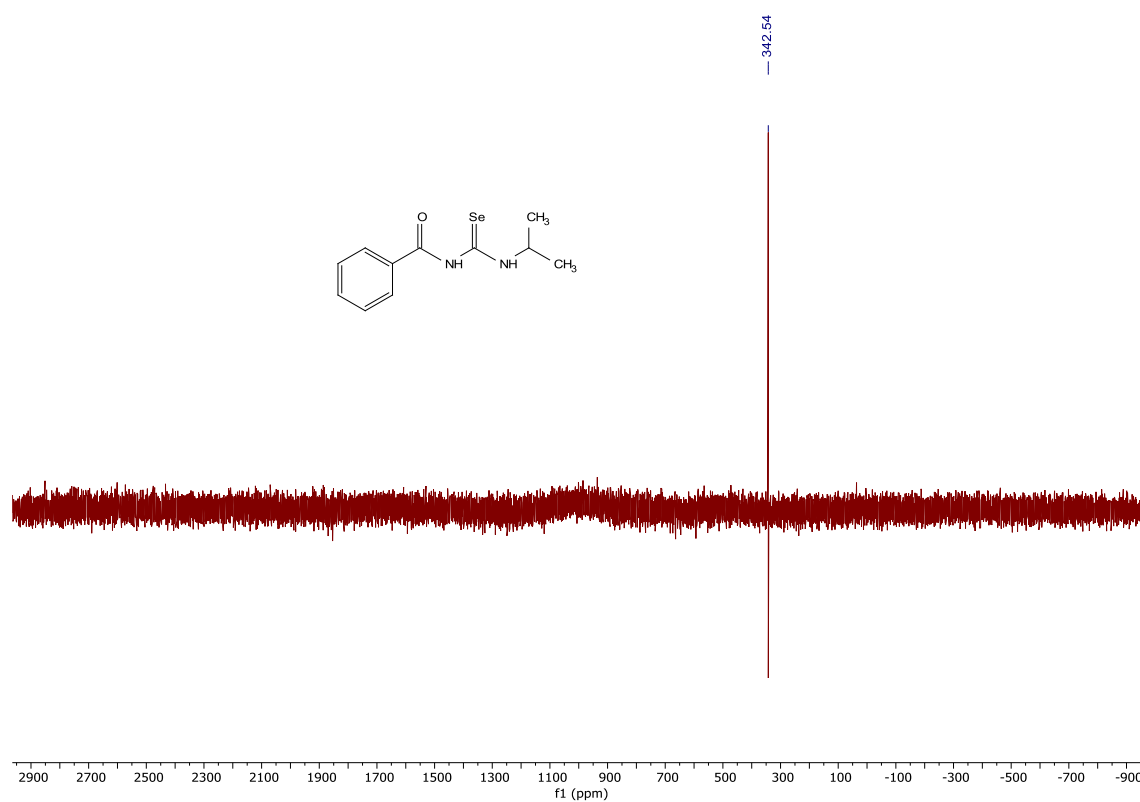

**Figure S62.** <sup>77</sup>Se-NMR spectrum of compound **15**.

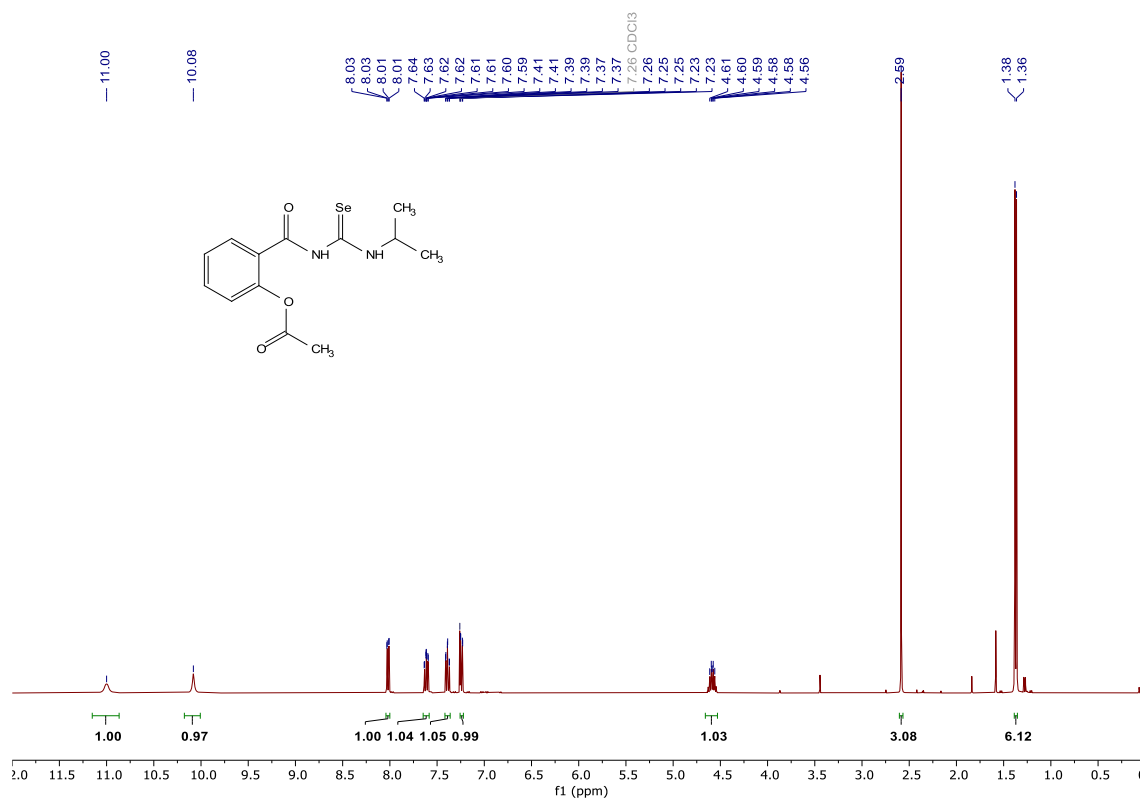

Figure S63. <sup>1</sup>H-NMR spectrum of compound 16.

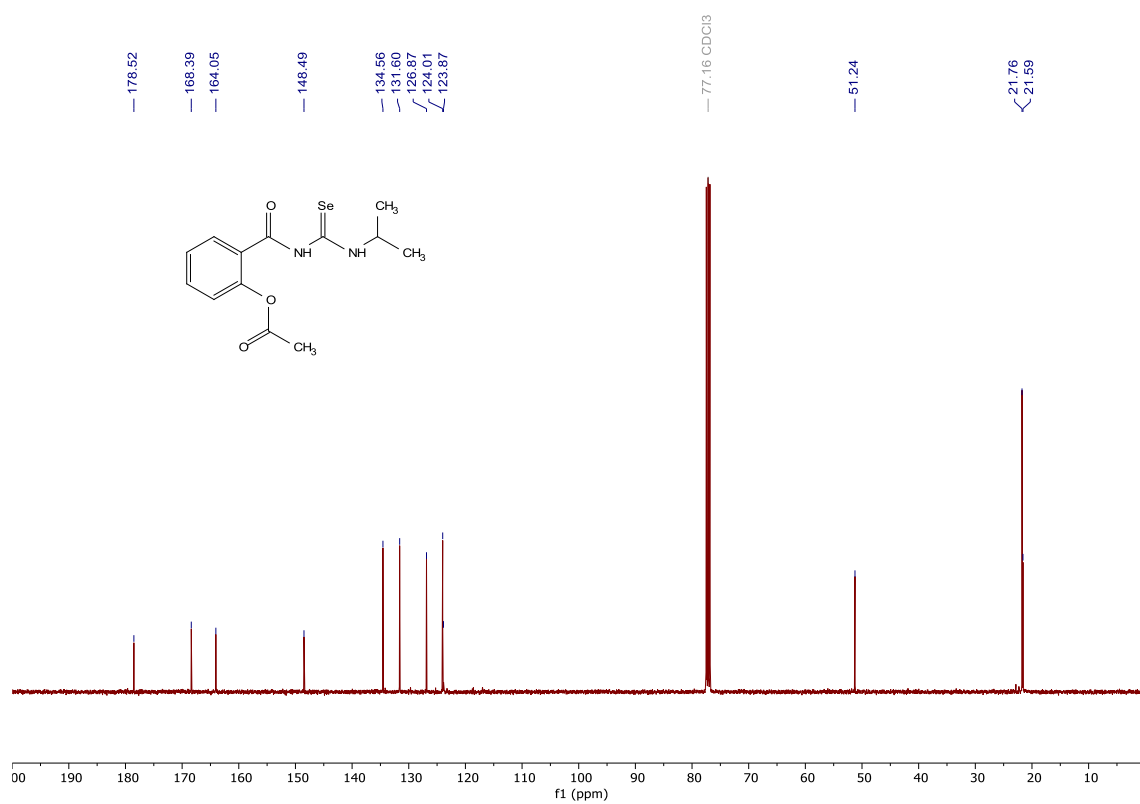

Figure S64. <sup>13</sup>C-NMR spectrum of compound 16.

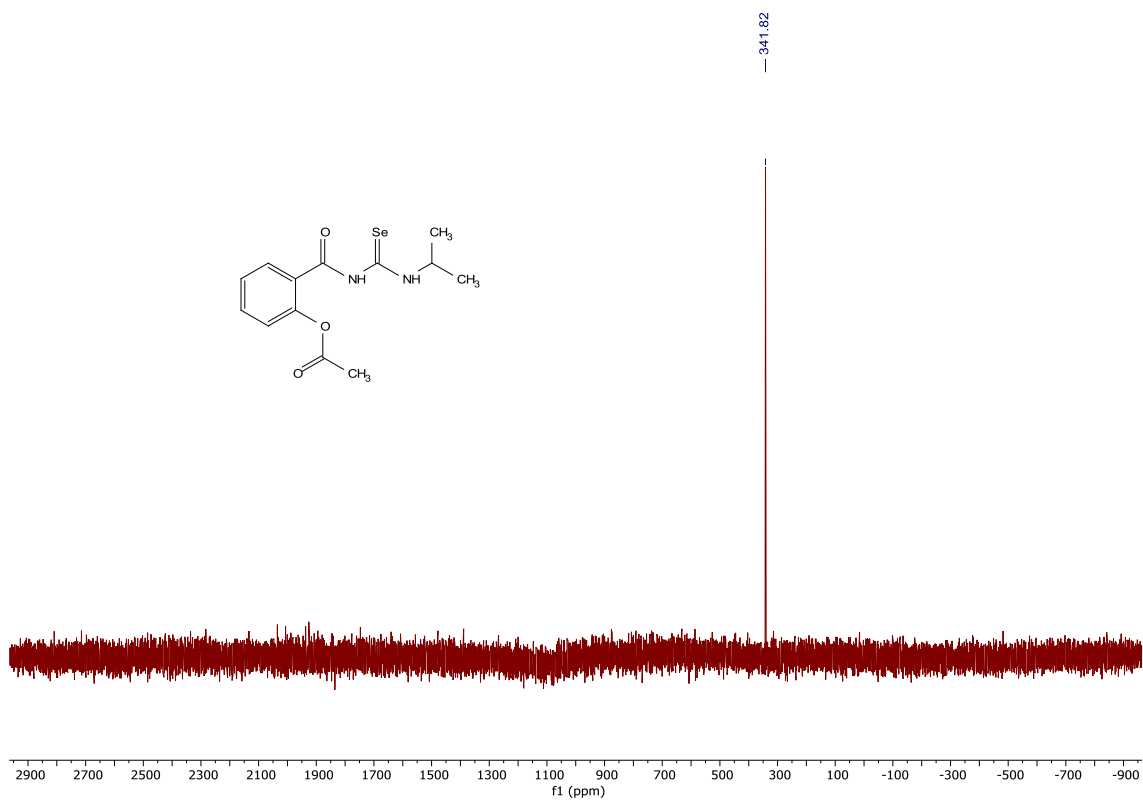

Figure S65. <sup>77</sup>Se-NMR spectrum of compound 16.

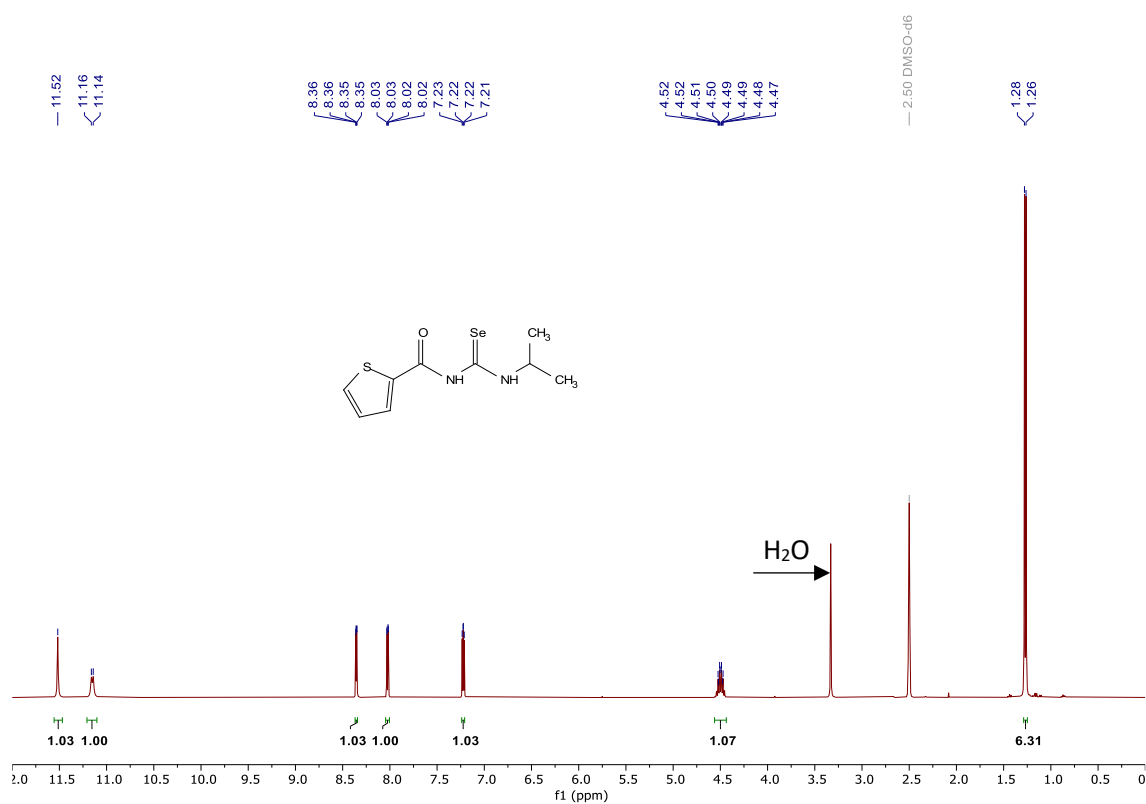

Figure S66. <sup>1</sup>H-NMR spectrum of compound 17.

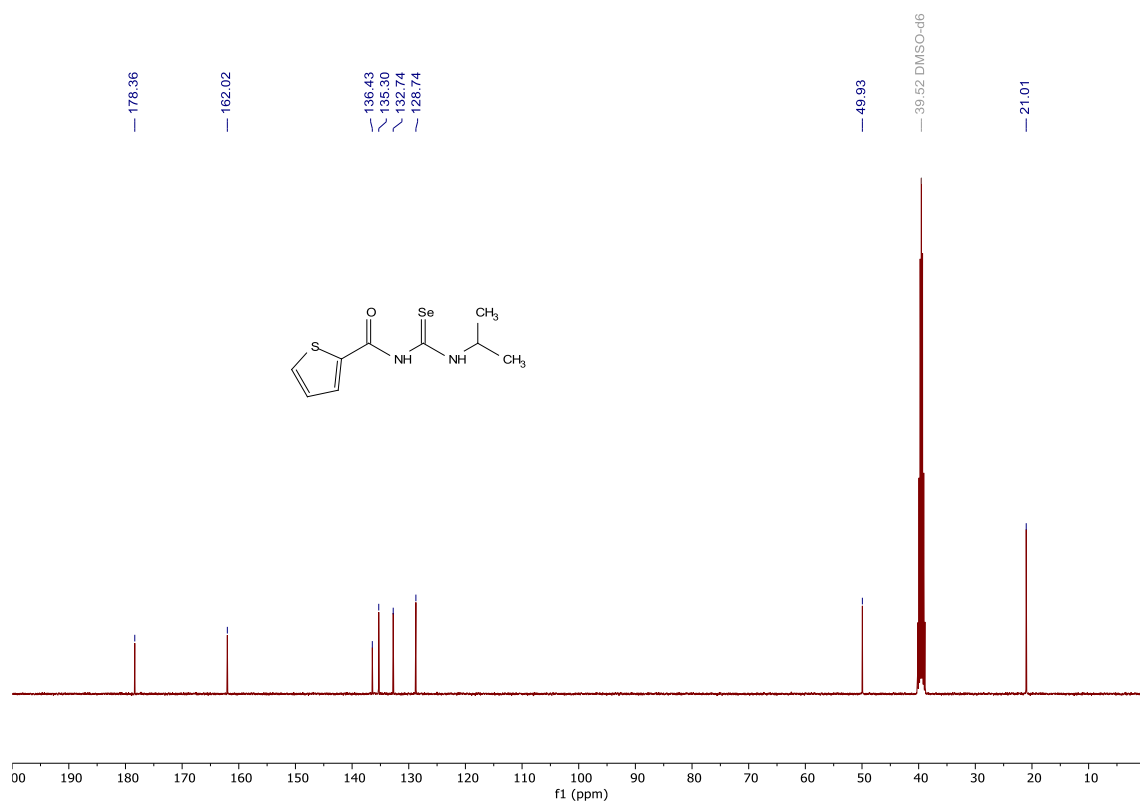

**Figure S67.** <sup>13</sup>C-NMR spectrum of compound **17**.

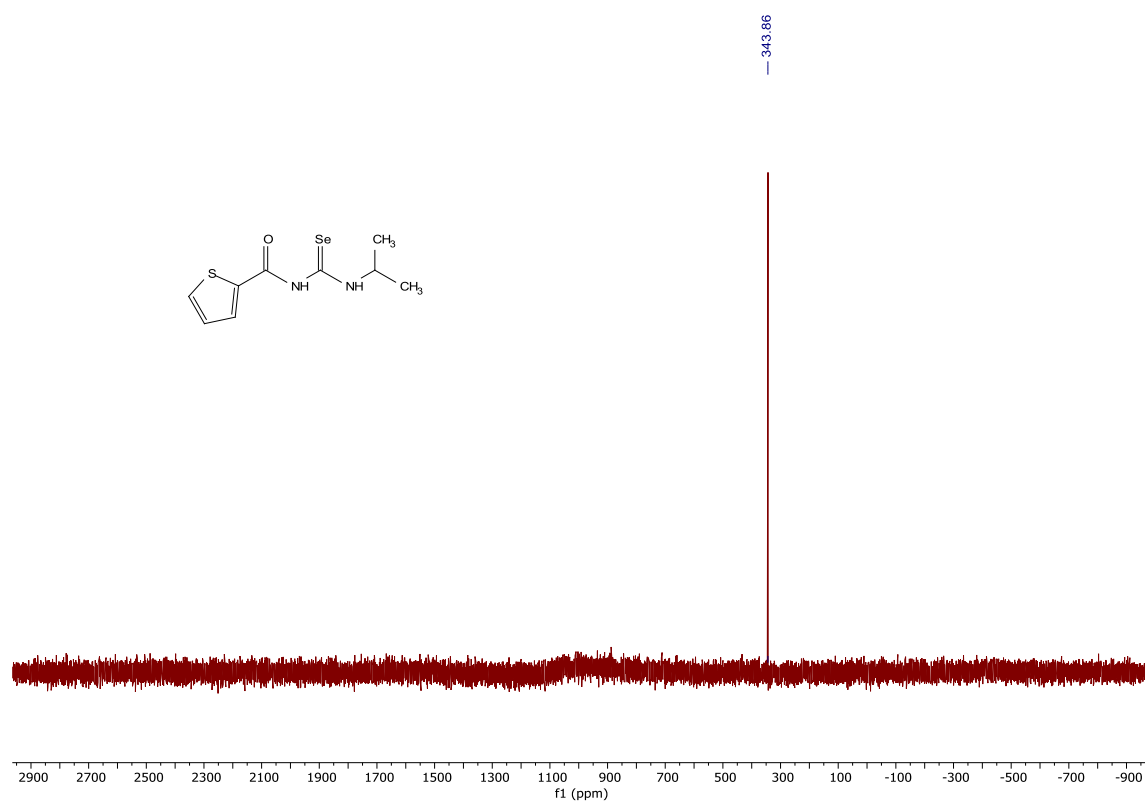

**Figure S68.** <sup>77</sup>Se-NMR spectrum of compound **17**.



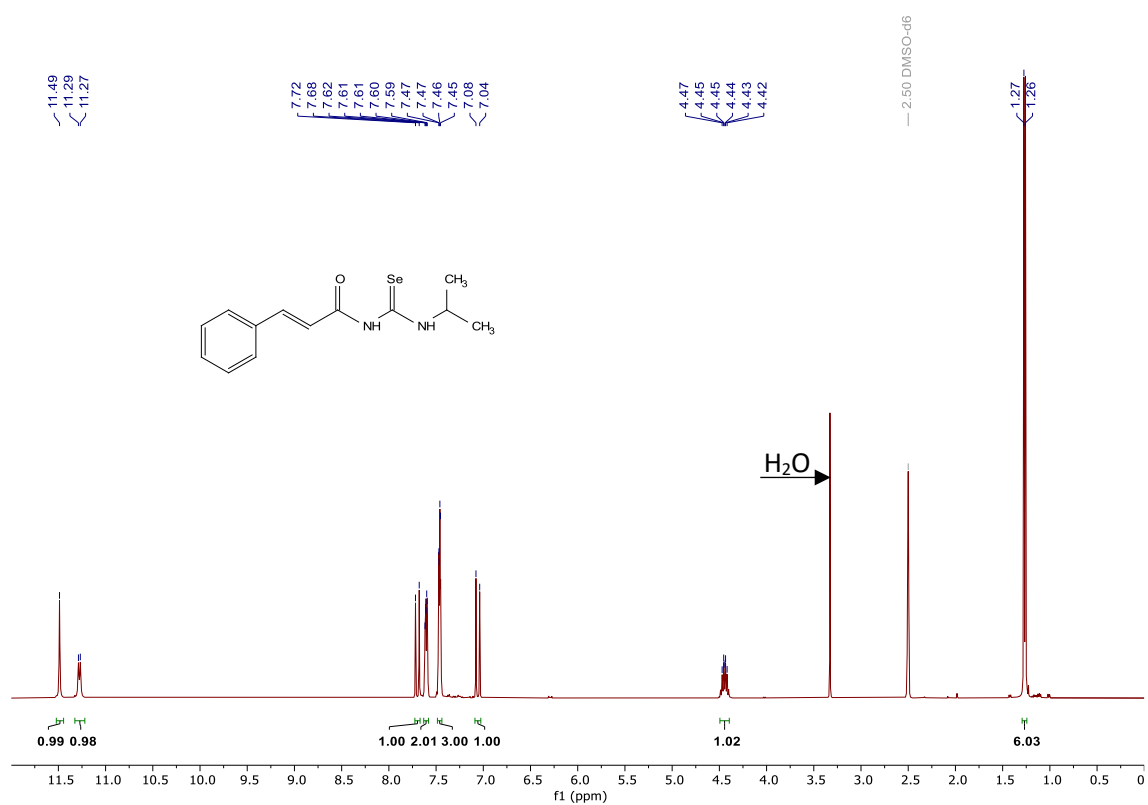

Figure S69. <sup>1</sup>H-NMR spectrum of compound 18.

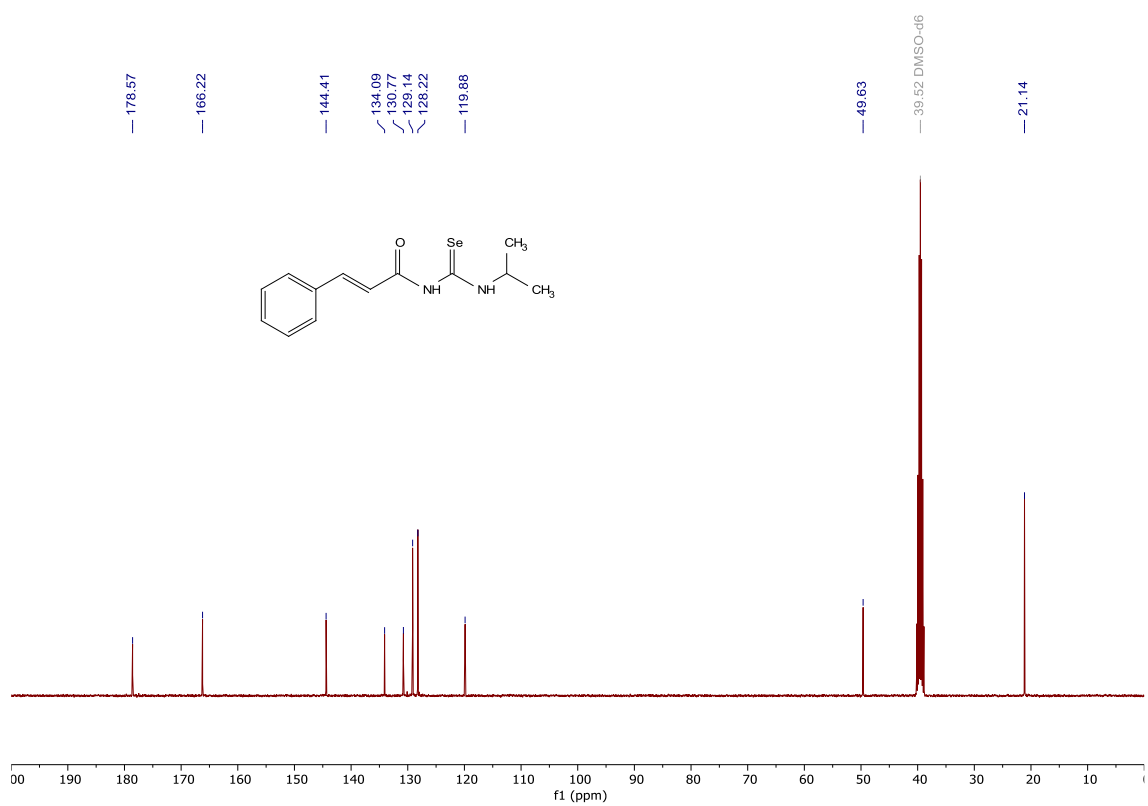

Figure S70. <sup>13</sup>C-NMR spectrum of compound 18.

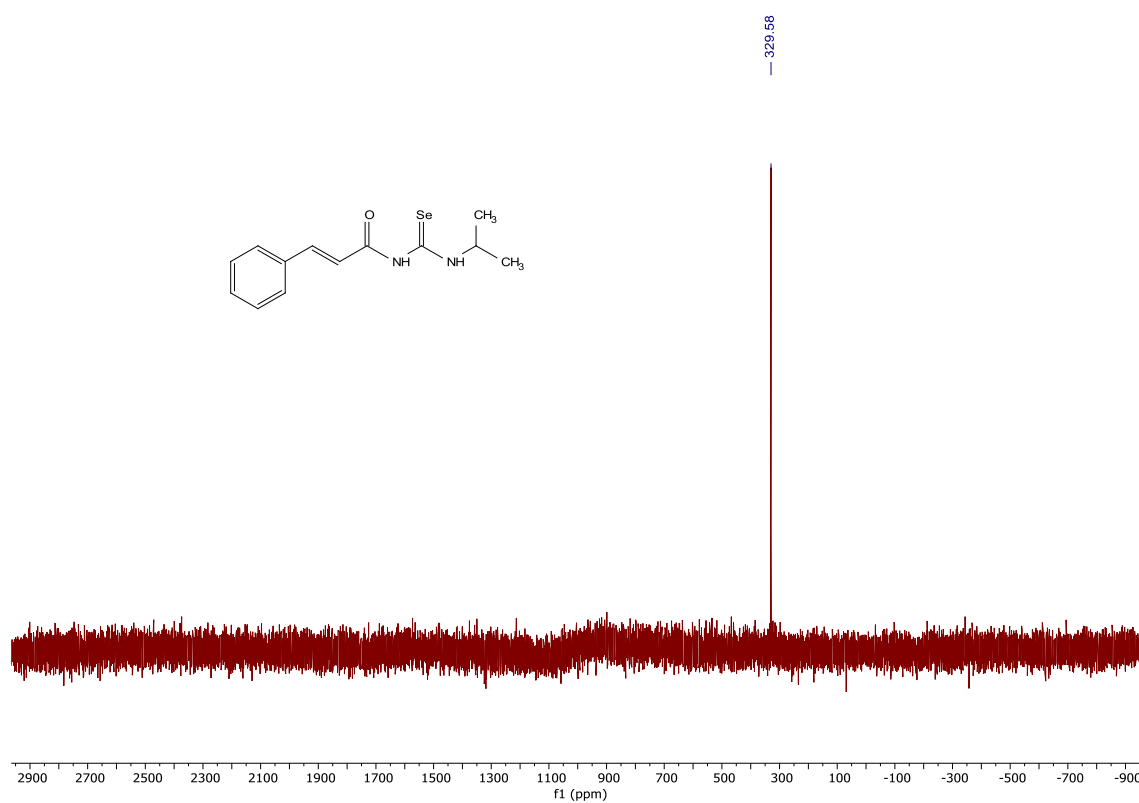

Figure S71. <sup>77</sup>Se-NMR spectrum of compound 18.

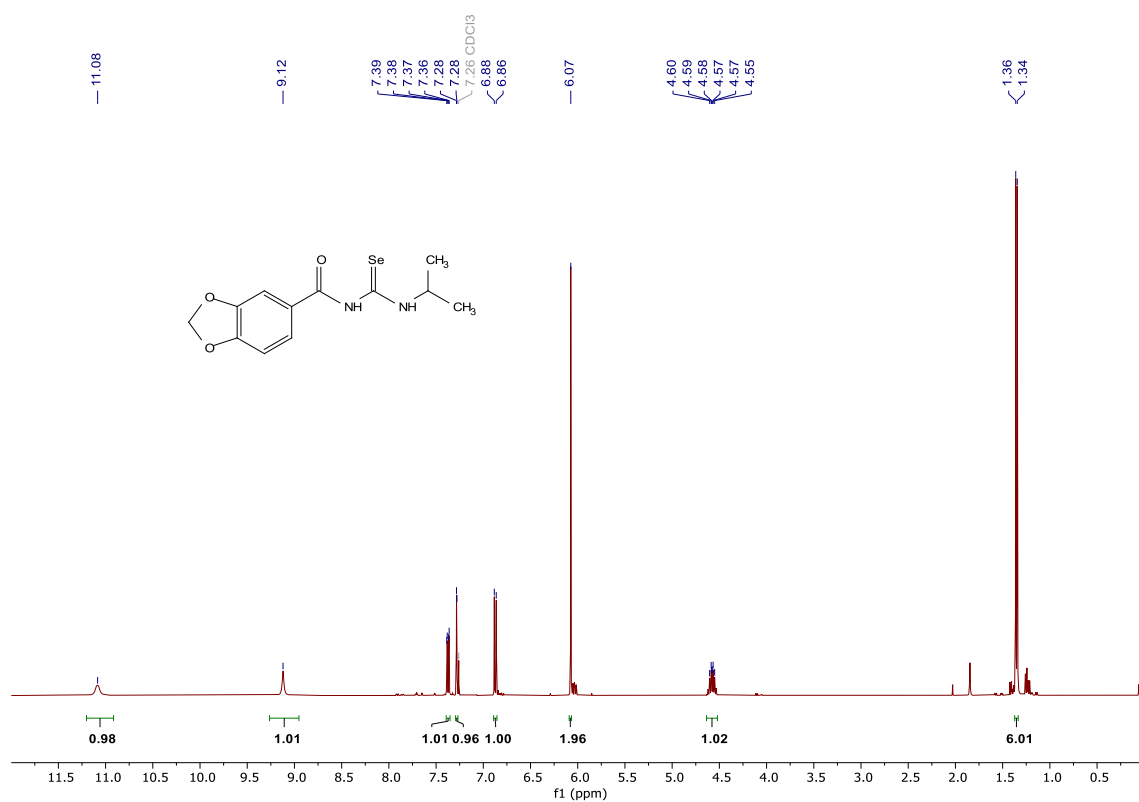

Figure S72. <sup>1</sup>H-NMR spectrum of compound 19.

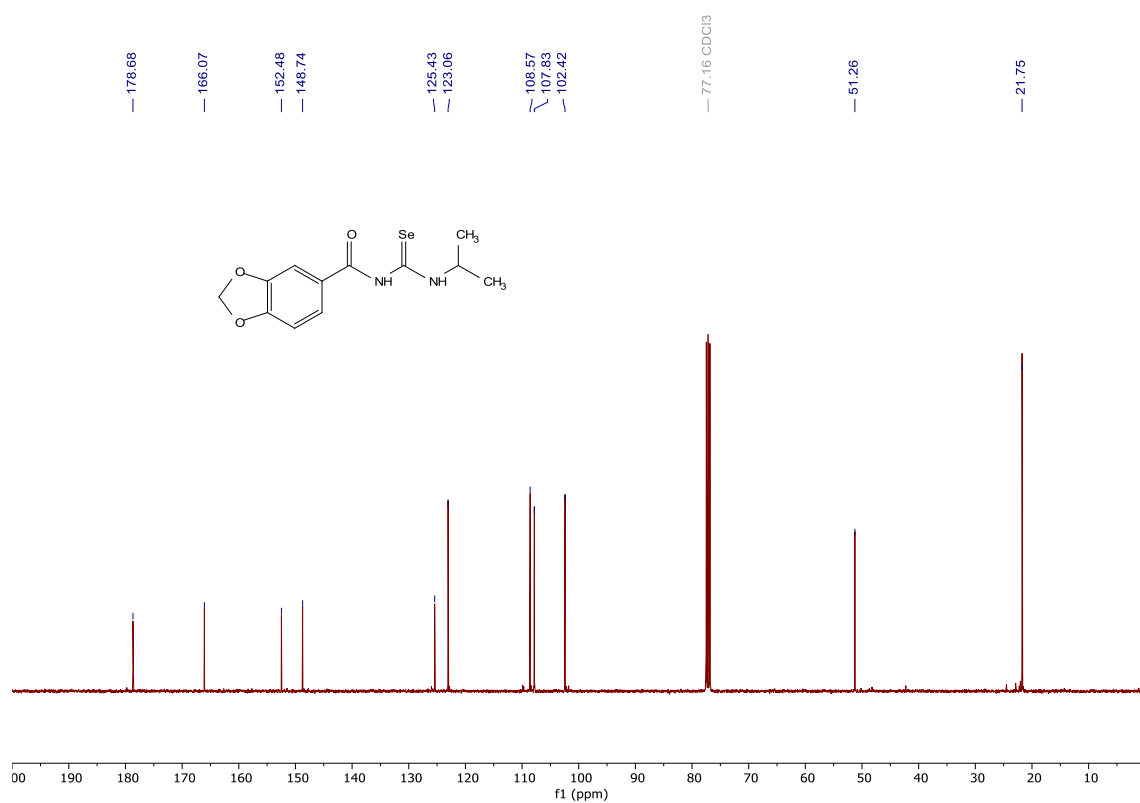

**Figure S73.** <sup>13</sup>C-NMR spectrum of compound 19.

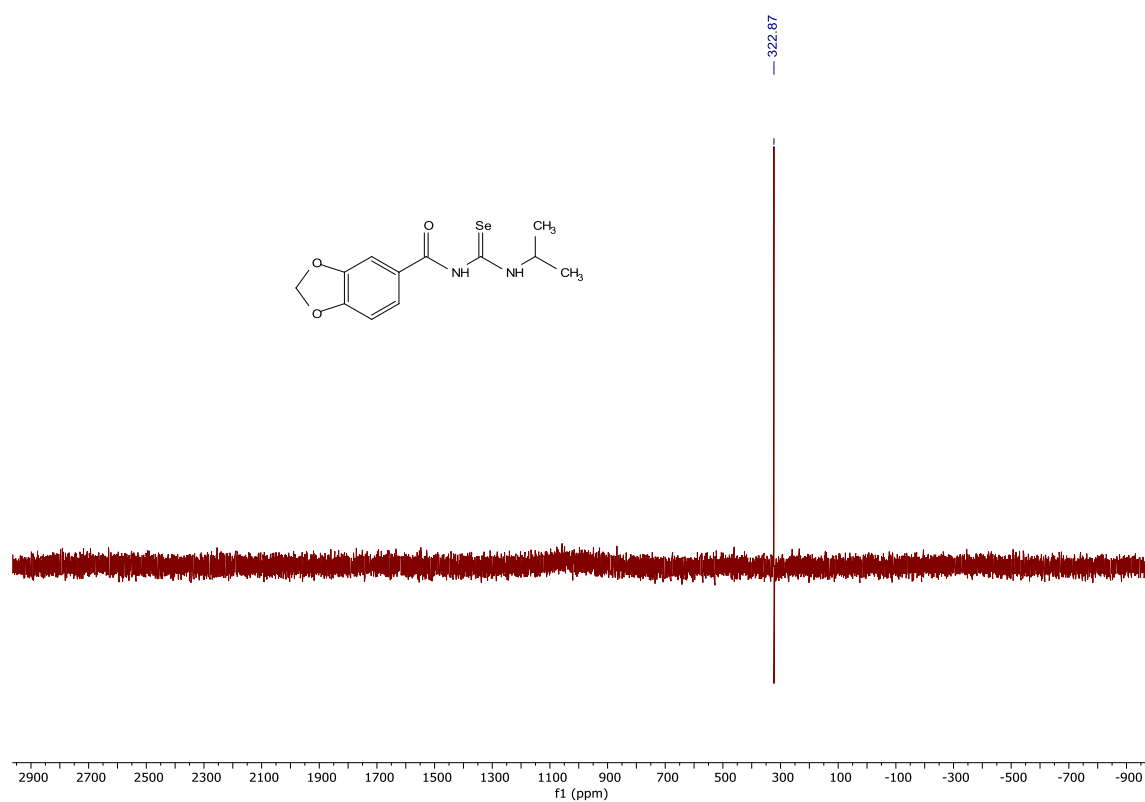

**Figure S74.** <sup>77</sup>Se-NMR spectrum of compound 19.

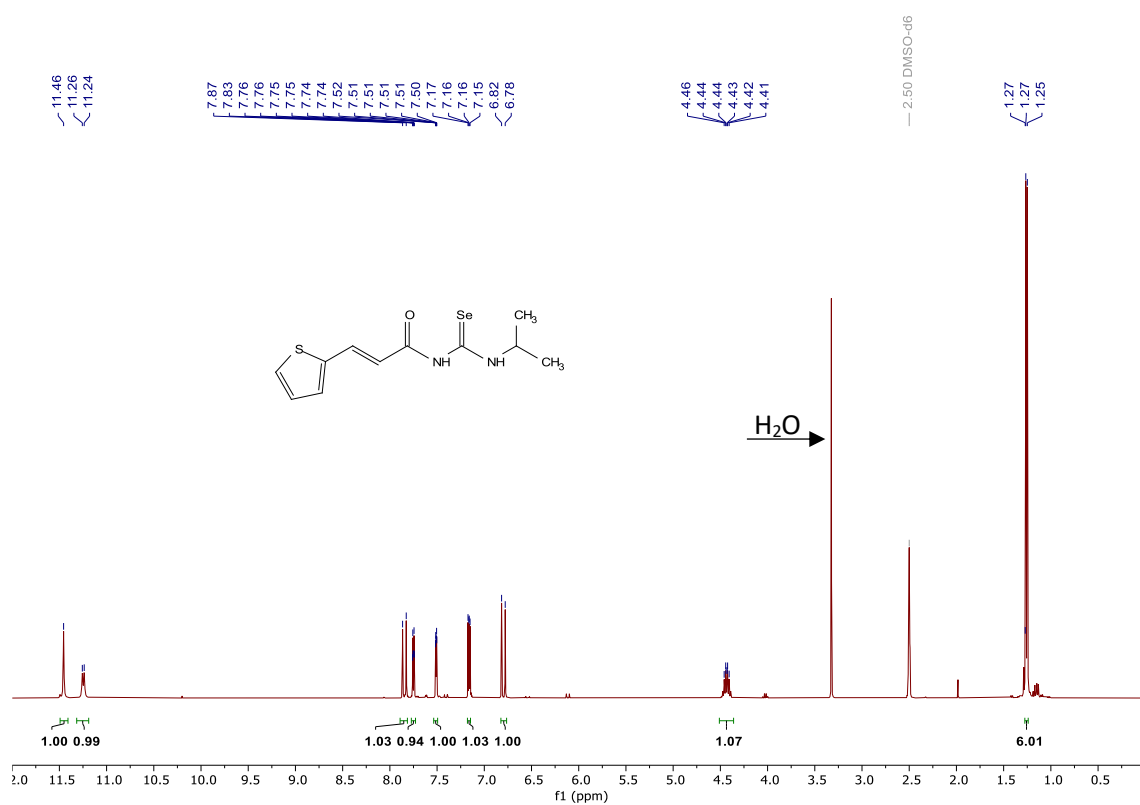

Figure S75. <sup>1</sup>H-NMR spectrum of compound 20.

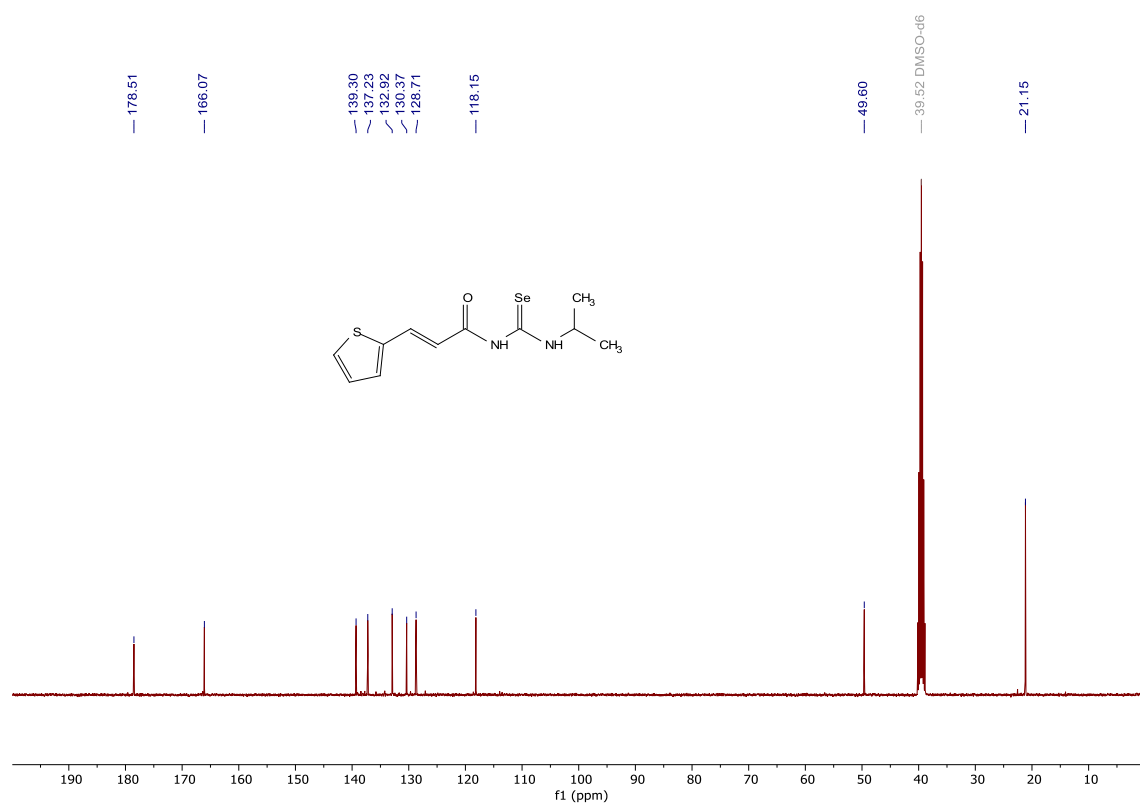

Figure S76. <sup>13</sup>C-NMR spectrum of compound 20.

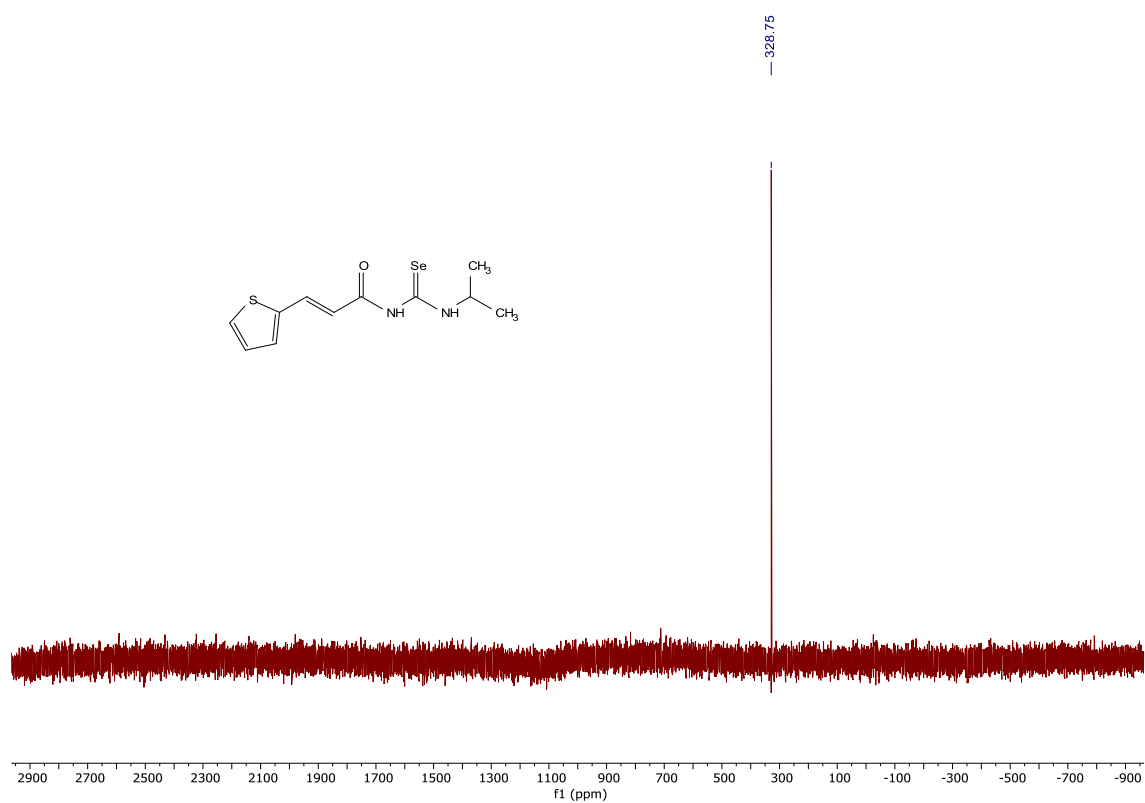

Figure S77. <sup>77</sup>Se-NMR spectrum of compound 20.

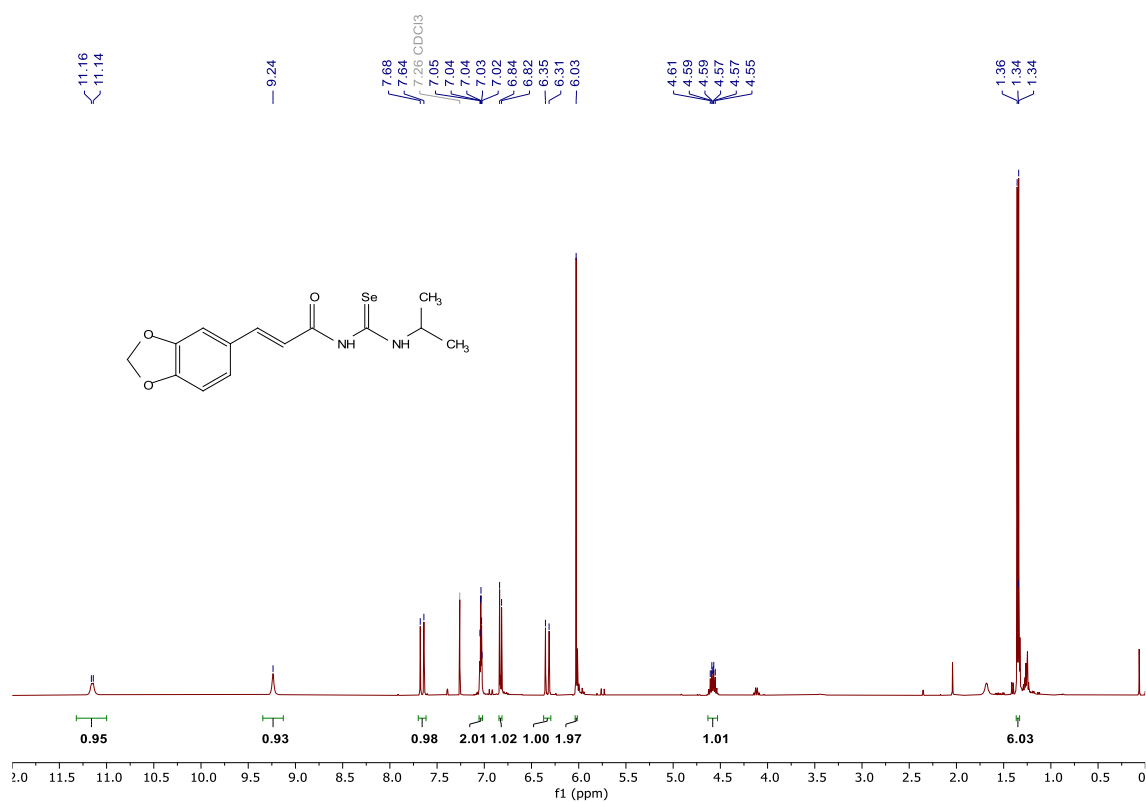

Figure S78. <sup>1</sup>H-NMR spectrum of compound 21.

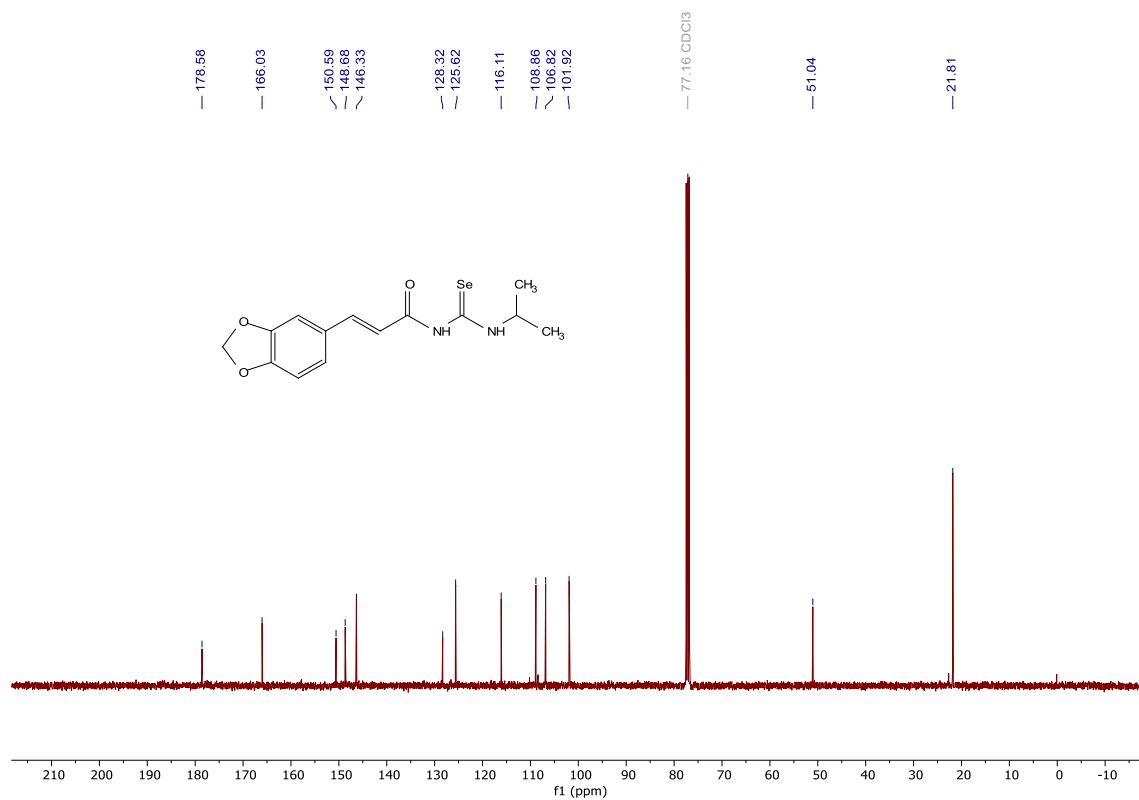

**Figure S79.** <sup>13</sup>C-NMR spectrum of compound **21**.

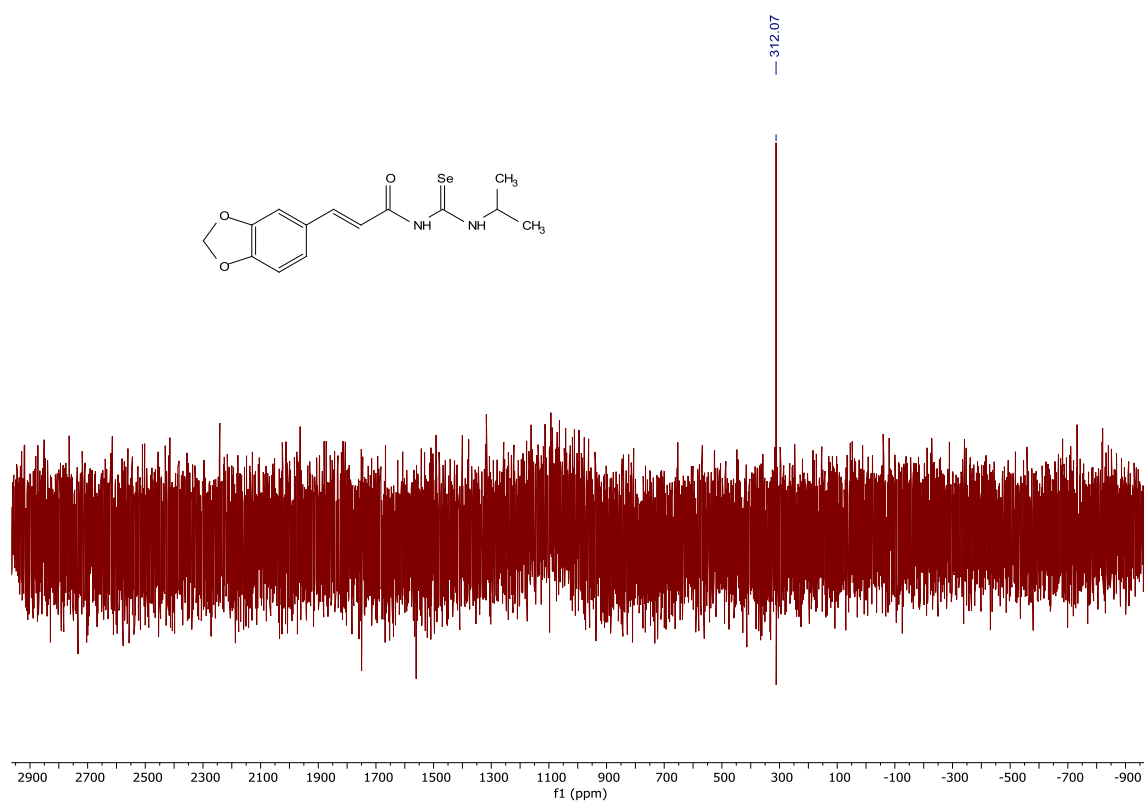

**Figure S80.** <sup>77</sup>Se-NMR spectrum of compound **21**.

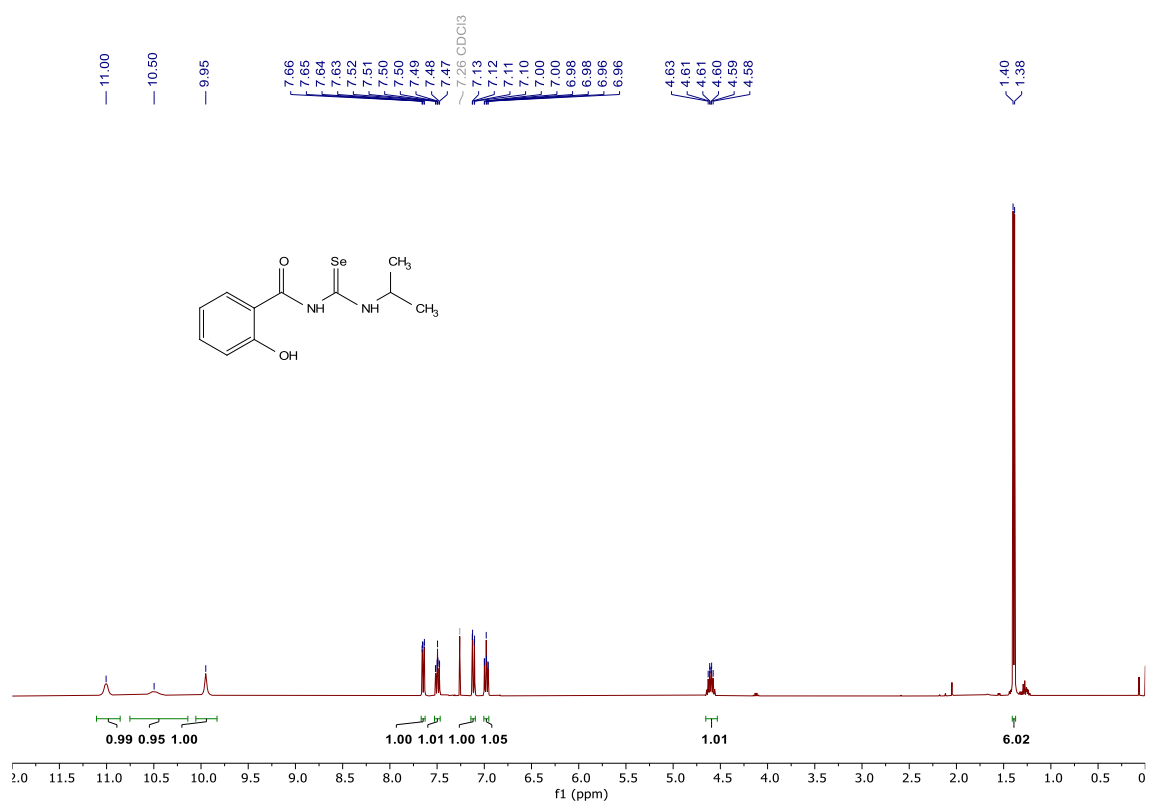

**Figure S81.** <sup>1</sup>H-NMR spectrum of compound **22**.

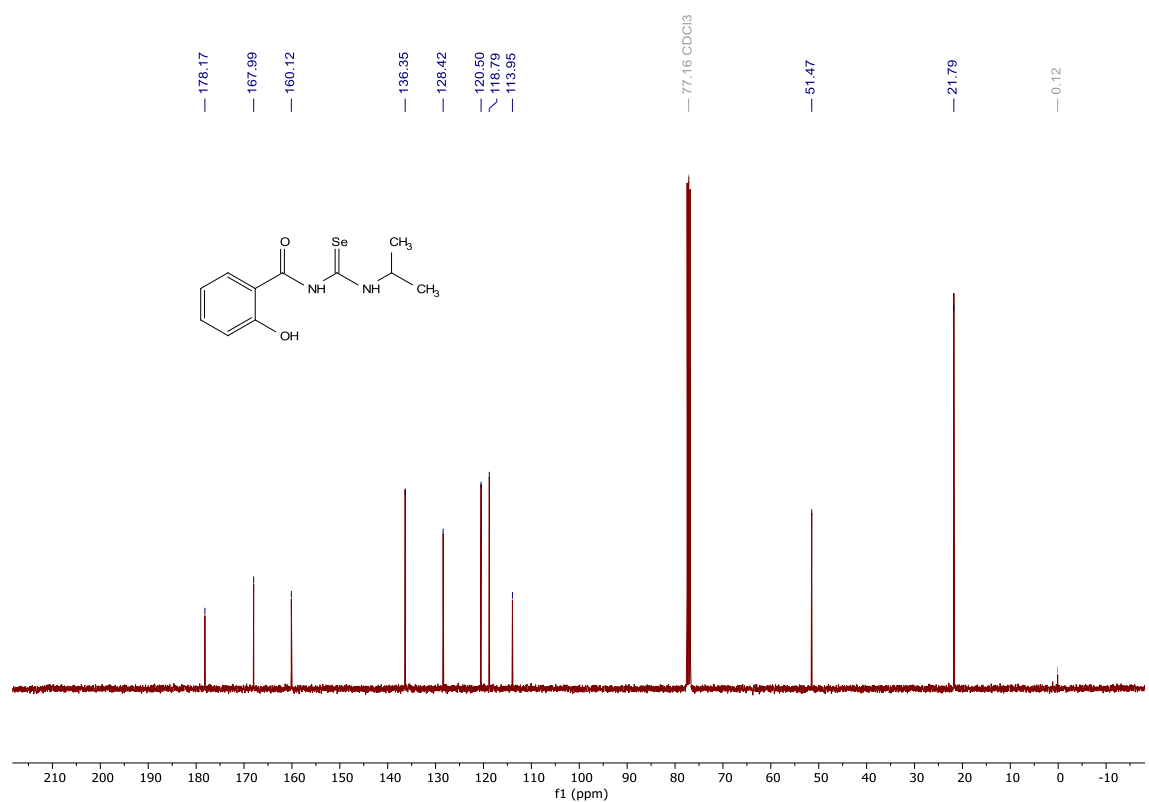

**Figure S82.** <sup>13</sup>C-NMR spectrum of compound **22**.

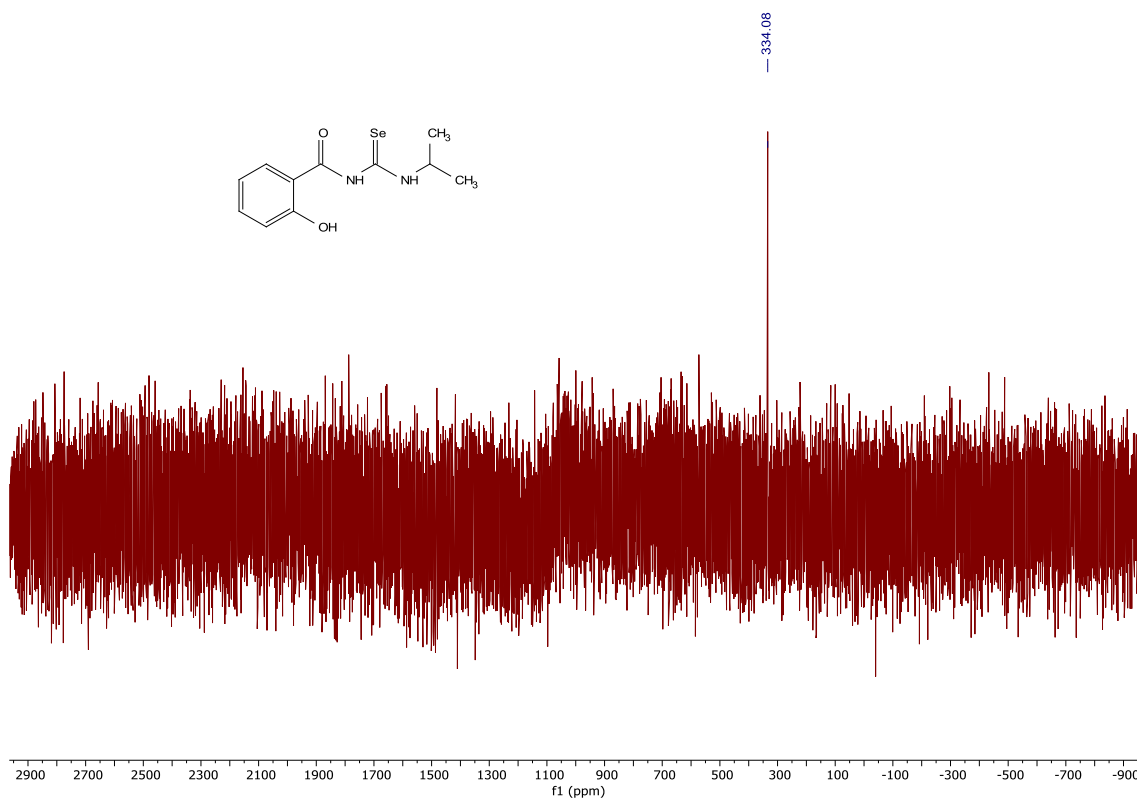

**Figure S83.**  $^{77}\text{Se}$ -NMR spectrum of compound **22**.

## Characterization of the compounds synthesized in this work.

**(*E*)-2-Acetoxybenzoic (*E*)-*N,N'*-dicyclohexylcarbamimidic selenoanhydride (**1**).** From *O*-acetyl salicyloyl chloride and *N,N'*-dicyclohexylcarbodiimide. Appearance: yellow solid. Melting point: 96-97 °C. Yield: 21%.  $^1\text{H}$ -NMR in  $\text{CDCl}_3$  (400 MHz)  $\delta$  (ppm): 9.25 (d,  $J = 8.1$ , 1H, NH), 7.86 (dd,  $J = 7.7$ , 1.6, 1H,  $\text{H}_{\text{aryl}}$ ), 7.40 (td,  $J = 7.8$ , 1.7, 1H,  $\text{H}_{\text{aryl}}$ ), 7.20 (td,  $J = 7.6$ , 1.1, 1H,  $\text{H}_{\text{aryl}}$ ), 7.05 (dd,  $J = 8.2$ , 1.2, 1H,  $\text{H}_{\text{aryl}}$ ), 4.53 (tt,  $J = 12.2$ , 3.6, 1H,  $\text{H}_{\text{cyclohexyl}}$ ), 3.97 (dtd,  $J = 10.9$ , 7.4, 4.0, 1H,  $\text{H}_{\text{cyclohexyl}}$ ), 2.31 (s, 5H,  $\text{CH}_3$  and 2 $\text{H}_{\text{cyclohexyl}}$ ), 1.93 – 0.79 (m, 18 $\text{H}_{\text{cyclohexyl}}$ ).  $^{13}\text{C}$ -NMR in  $\text{CDCl}_3$  (100 MHz)  $\delta$  (ppm): 187.33 (C=N), 171.81 (C=O<sub>acetoxy</sub>), 164.21 (C=O), 148.48 ( $\text{C}_{\text{aryl}}$ ), 131.80 ( $\text{C}_{\text{aryl}}$ ), 128.63 ( $\text{C}_{\text{aryl}}$ ), 127.31 ( $\text{C}_{\text{aryl}}$ ), 126.02 ( $\text{C}_{\text{aryl}}$ ), 121.92 ( $\text{C}_{\text{aryl}}$ ), 62.29 ( $\text{C}_{\text{cyclohexyl}}$ ), 57.72 ( $\text{C}_{\text{cyclohexyl}}$ ), 29.58 ( $\text{C}_{\text{cyclohexyl}}$ ), 26.47 ( $\text{C}_{\text{cyclohexyl}}$ ), 25.38 ( $\text{C}_{\text{cyclohexyl}}$ ), 25.18 ( $\text{C}_{\text{cyclohexyl}}$ ), 24.39 ( $\text{C}_{\text{cyclohexyl}}$ ), 21.42 ( $\text{CH}_3$ ).  $^{77}\text{Se}$ -NMR in  $\text{CDCl}_3$  (76 MHz)  $\delta$  (ppm): 462.28. Elemental analysis for  $\text{C}_{22}\text{H}_{30}\text{N}_2\text{O}_3\text{Se}$  calculated/found (percent): C, 58.79/58.83; H, 6.73/6.92; N, 6.23/6.14.

**Cinnamic (*E*)-*N,N'*-dicyclohexylcarbamimidic selenoanhydride (**2**).** From cinnamoyl chloride and *N,N'*-dicyclohexylcarbodiimide. Appearance: brown solid. Melting point: 156-158 °C. Yield: 8%.  $^1\text{H}$ -NMR in  $\text{DMSO}-d_6$  (400 MHz)  $\delta$  (ppm): 8.41 (d,  $J = 7.9$ , 1H, NH), 7.59 – 7.48 (m, 3H,  $\text{H}_2$ ,  $\text{H}_{\text{aryl}}$  y  $\text{H}_{\text{alkene}}$ ), 7.47 – 7.36 (m, 3H,  $\text{H}_{\text{aryl}}$ ), 6.68 (d,  $J = 15.5$ , 1H,  $\text{H}_{\text{alkene}}$ ), 4.09 (ddt,  $J = 12.0$ , 7.3, 3.5, 1H,  $\text{H}_{\text{cyclohexyl}}$ ), 3.64 – 3.49 (m, 1H,  $\text{H}_{\text{cyclohexyl}}$ ), 1.86 – 1.42 (m, 12H,  $\text{H}_{\text{cyclohexyl}}$ ), 1.33 – 0.97 (m, 8H,  $\text{H}_{\text{cyclohexyl}}$ ).  $^{13}\text{C}$ -NMR in  $\text{DMSO}-d_6$  (100 MHz)  $\delta$  (ppm): 162.74 (C=O), 153.34 (C=N), 140.93 ( $\text{C}_{\text{alkene}}$ ), 134.65 ( $\text{C}_{\text{aryl}}$ ), 129.83 ( $\text{C}_{\text{aryl}}$ ), 129.04 ( $\text{C}_{\text{aryl}}$ ), 127.65 ( $\text{C}_{\text{aryl}}$ ), 119.65 ( $\text{C}_{\text{alkene}}$ ), 52.83 ( $\text{C}_{\text{alkene}}$ ), 49.60 ( $\text{C}_{\text{alkene}}$ ), 31.85 ( $\text{C}_{\text{cyclohexyl}}$ ), 30.43 ( $\text{C}_{\text{cyclohexyl}}$ ), 25.45 ( $\text{C}_{\text{cyclohexyl}}$ ), 25.15 ( $\text{C}_{\text{cyclohexyl}}$ ), 25.05



(C<sub>cyclohexyl</sub>), 24.38 (C<sub>cyclohexyl</sub>). <sup>77</sup>Se-NMR in DMSO-*d*<sub>6</sub> (76 MHz) δ (ppm): peak not found. Elemental analysis for C<sub>22</sub>H<sub>30</sub>N<sub>2</sub>OSe calculated/found (percent): C, 63.30/63.59; H, 7.24/7.19; N, 6.71/6.74.

**Benzoic *N,N'*-diisopropylcarbamimidic selenoanhydride (3).** From benzoyl chloride and *N,N'*-diisopropylcarbodiimide. Appearance: yellow solid. Melting point: 163-165 °C. Yield: 58%. <sup>1</sup>H-NMR in DMSO-*d*<sub>6</sub> (400 MHz) δ (ppm): 10.35 (d, *J* = 7.9, 1H, NH), 7.63 – 7.60 (m, 2H, H<sub>aryl</sub>), 7.46 – 7.40 (m, 1H, H<sub>aryl</sub>), 7.39 – 7.33 (m, 2H, H<sub>aryl</sub>), 4.87 (p, *J* = 6.8, 1H, H<sub>isopropyl</sub>), 4.09 (dt, *J* = 8.0, 6.5, 1H, H<sub>isopropyl</sub>), 1.43 (d, *J* = 6.9, 6H, H<sub>isopropyl</sub>), 0.70 (d, *J* = 6.6, 6H, H<sub>isopropyl</sub>). <sup>13</sup>C-NMR in DMSO-*d*<sub>6</sub> (100 MHz) δ (ppm): 185.77 (C=N), 167.97 (C=O), 137.01 (C<sub>aryl</sub>), 130.30 (C<sub>aryl</sub>), 127.72 (C<sub>aryl</sub>), 127.08 (s, 2C, C<sub>aryl</sub>), 51.33 (C<sub>isopropyl</sub>), 50.19 (C<sub>isopropyl</sub>), 19.93 (C<sub>isopropyl</sub>), 19.31 (C<sub>isopropyl</sub>). <sup>77</sup>Se-NMR in DMSO-*d*<sub>6</sub> (76 MHz) δ (ppm): 474.01. Elemental analysis for C<sub>14</sub>H<sub>20</sub>N<sub>2</sub>OSe calculated/found (percent): C, 54.02/54.37; H, 6.48/6.23; N, 9.00/8.98.

**(*E*)-2-Acetoxybenzoic (*E*)-*N,N'*-diisopropylcarbamimidic selenoanhydride (4).** From *O*-acetylsalicyloyl chloride and *N,N'*-diisopropylcarbodiimide. Appearance: yellow solid. Melting point: 79-81 °C. Yield: 40%. <sup>1</sup>H-NMR in DMSO-*d*<sub>6</sub> (400 MHz) δ (ppm): 10.19 (d, *J* = 8.0, 1H, NH), 7.57 (d, *J* = 7.5, 1H, H<sub>aryl</sub>), 7.44 (td, *J* = 10.0, 8.0, 2.0, 1H, H<sub>aryl</sub>), 7.28 – 7.18 (m, 2H, H<sub>aryl</sub>), 4.77 – 4.65 (m, 1H, H<sub>isopropyl</sub>), 4.10 (h, *J* = 6.7, 1H, H<sub>isopropyl</sub>), 2.24 (s, 3H, CH<sub>3</sub>), 1.42 (dd, *J* = 6.8, 2.3, 6H, H<sub>isopropyl</sub>), 0.83 (dd, *J* = 6.7, 2.3, 6H, H<sub>isopropyl</sub>). <sup>13</sup>C-NMR in DMSO-*d*<sub>6</sub> (100 MHz) δ (ppm): 184.80 (C=N), 169.00 (C=O<sub>acetoxy</sub>), 163.61 (C=O), 147.17 (C<sub>aryl</sub>), 130.54 (C<sub>aryl</sub>), 129.20 (C<sub>aryl</sub>), 128.00 (C<sub>aryl</sub>), 125.03 (C<sub>aryl</sub>), 122.87 (C<sub>aryl</sub>), 50.72 (C<sub>isopropyl</sub>), 50.24 (C<sub>isopropyl</sub>), 21.19 (CH<sub>3</sub>), 19.74 (C<sub>isopropyl</sub>), 19.36 (C<sub>isopropyl</sub>). <sup>77</sup>Se-NMR in CDCl<sub>3</sub> (76 MHz) δ (ppm): 458.28. Elemental analysis for C<sub>16</sub>H<sub>22</sub>N<sub>2</sub>O<sub>3</sub>Se calculated/found (percent): C, 52.03/51.95; H, 6.00/6.32; N, 7.58/7.48.

**(*E*)-(*E*)-*N,N'*-Diisopropylcarbamimidic 2-(thiophen-2-yl)acetic selenoanhydride (5).** From thiophene-2-acetyl chloride and *N,N'*-diisopropylcarbodiimide. Appearance: yellow solid. Melting point: 108-110 °C. Yield: 15%. <sup>1</sup>H-NMR in DMSO-*d*<sub>6</sub> (400 MHz) δ (ppm): 11.13 (d, *J* = 7.9, 1H, NH), 7.37 (dd, *J* = 5.1, 1.3, 1H, H<sub>aryl</sub>), 6.94 (dd, *J* = 5.1, 3.5, 1H, H<sub>aryl</sub>), 6.90 (dd, *J* = 3.5, 1.2, 1H, H<sub>aryl</sub>), 4.45 (m, 2H, H<sub>isopropyl</sub>), 3.87 (d, *J* = 0.9, 2H, CH<sub>2</sub>), 1.27 (dd, *J* = 10.4, 6.7, 12H, H<sub>isopropyl</sub>). <sup>13</sup>C-NMR in DMSO-*d*<sub>6</sub> (100 MHz) δ (ppm): 184.92 (C=N), 164.95 (C=O), 136.43 (C<sub>aryl</sub>), 126.69 (C<sub>aryl</sub>), 126.29 (C<sub>aryl</sub>), 125.34 (C<sub>aryl</sub>), 50.84 (C<sub>isopropyl</sub>), 48.01 (C<sub>isopropyl</sub>), 34.97 (CH<sub>2</sub>), 19.80 (C<sub>isopropyl</sub>), 19.70 (C<sub>isopropyl</sub>). <sup>77</sup>Se-NMR in DMSO-*d*<sub>6</sub> (76 MHz) δ (ppm): 582.90. Elemental analysis for C<sub>13</sub>H<sub>20</sub>N<sub>2</sub>OSe calculated/found (percent): C, 47.12/47.37; H, 6.08/6.25; N, 8.45/8.43.

**(*E*)-(*E*)-*N,N'*-Diisopropylcarbamimidic thiophene-2-carboxylic selenoanhydride (6).** From 2-thiophenecarbonyl chloride and *N,N'*-diisopropylcarbodiimide. Appearance: yellow solid. Melting point: 120-122 °C. Yield: 46%. <sup>1</sup>H-NMR in CDCl<sub>3</sub> (400 MHz) δ (ppm): 7.80 (dd, *J* = 3.9, 1.2, 1H, H<sub>aryl</sub>), 7.72 (d, *J* = 7.1, 1H, NH), 7.48 (dd, *J* = 5.0, 1.2, 1H, H<sub>aryl</sub>), 7.00 (dd, *J* = 5.0, 3.8, 1H, H<sub>aryl</sub>), 5.05 (p, *J* = 6.8, 1H, H<sub>isopropyl</sub>), 4.56 – 4.46 (m, 1H, H<sub>isopropyl</sub>), 1.45 (d, *J* = 6.8, 6H, H<sub>isopropyl</sub>), 1.07 (d, *J* = 6.6, 6H, H<sub>isopropyl</sub>). <sup>13</sup>C-NMR in CDCl<sub>3</sub> (100 MHz) δ (ppm): 187.72 (C=N), 162.59 (C=O), 138.53 (C<sub>aryl</sub>), 131.76 (C<sub>aryl</sub>), 131.59 (C<sub>aryl</sub>), 127.61 (C<sub>aryl</sub>), 54.22 (C<sub>isopropyl</sub>), 51.02 (C<sub>isopropyl</sub>), 20.61 (C<sub>isopropyl</sub>), 20.42 (C<sub>isopropyl</sub>). <sup>77</sup>Se-NMR in CDCl<sub>3</sub> (76 MHz) δ (ppm): 529.29. Elemental analysis for C<sub>12</sub>H<sub>18</sub>N<sub>2</sub>OSe calculated/found (percent): C, 45.42/45.22; H, 5.72/5.81; N, 8.83/8.90.

**(*E*)-Benzo[*d*][1,3]dioxole-5-carboxylic (*E*)-*N,N'*-diisopropylcarbamimidic selenoanhydride (7).** From piperonylic acid and *N,N'*-diisopropylcarbodiimide. Appearance: yellow solid. Melting point: 138-140 °C. Yield: 14%. <sup>1</sup>H-NMR in DMSO-*d*<sub>6</sub> (400 MHz) δ (ppm): 10.29 (d, *J* = 8.1, 1H, NH), 7.20 (dd, *J* = 8.1, 1.7, 1H, H<sub>aryl</sub>), 7.11 (d, *J* = 1.7, 1H, H<sub>aryl</sub>), 6.91 (d, *J* = 8.1, 1H, H<sub>aryl</sub>), 6.05 (s, 2H, H<sub>aryl</sub>), 4.88 (p, *J* = 6.8, 1H, H<sub>isopropyl</sub>), 4.26 – 4.12 (m, 1H, H<sub>isopropyl</sub>), 1.40 (d, *J* = 6.8, 6H, H<sub>isopropyl</sub>), 0.81 (d, *J* = 6.7, 6H, H<sub>isopropyl</sub>). <sup>13</sup>C-NMR in DMSO-*d*<sub>6</sub> (100 MHz) δ (ppm): 186.07 (C=N), 167.58 (C=O), 149.13 (C<sub>aryl</sub>), 146.65 (C<sub>aryl</sub>), 130.82 (C<sub>aryl</sub>), 122.10 (C<sub>aryl</sub>), 107.91 (C<sub>aryl</sub>), 107.50 (C<sub>aryl</sub>), 101.53 (CH<sub>2</sub>), 51.85 (C<sub>isopropyl</sub>), 50.32 (C<sub>isopropyl</sub>), 19.97 (C<sub>isopropyl</sub>), 19.57 (C<sub>isopropyl</sub>). <sup>77</sup>Se-NMR in DMSO-*d*<sub>6</sub> (76 MHz) δ (ppm): 462.62. Elemental analysis for C<sub>15</sub>H<sub>20</sub>N<sub>2</sub>O<sub>3</sub>Se calculated/found (percent): C, 50.71/51.02; H, 5.67/5.59; N, 7.88/8.00.

***N*-(Cyclohexylcarbamosenoyl) benzamide (8).** From benzoyl chloride and cyclohexylamine. Appearance: Yellow solid. Melting point: 71-73 °C. Yield: 11%. <sup>1</sup>H-NMR in DMSO-*d*<sub>6</sub> (400 MHz) δ (ppm): 11.51 (s, 1H, NH), 11.43 (d, *J* = 8.0, 1H, NH), 7.93 – 7.89 (m, 2H, H<sub>aryl</sub>), 7.67 – 7.61 (m, 1H, H<sub>aryl</sub>), 7.51 (t, *J* = 7.8, 2H, H<sub>aryl</sub>), 4.34 – 4.23 (m, 1H, H<sub>cyclohexyl</sub>), 2.03 – 1.96 (m, 2H, H<sub>cyclohexyl</sub>), 1.66 (dt, *J* = 12.8, 4.5, 2H, H<sub>cyclohexyl</sub>), 1.60 – 1.52 (m, 1H, H<sub>cyclohexyl</sub>), 1.50 – 1.25 (m, 5H, H<sub>cyclohexyl</sub>). <sup>13</sup>C-NMR in DMSO-*d*<sub>6</sub> (100 MHz) δ (ppm): 178.85 (C=Se), 168.49 (C=O), 133.11 (C<sub>aryl</sub>), 131.94 (C<sub>aryl</sub>), 128.65 (C<sub>aryl</sub>), 128.39 (C<sub>aryl</sub>), 56.10 (C<sub>aryl</sub>), 30.63 (C<sub>cyclohexyl</sub>), 24.87 (C<sub>cyclohexyl</sub>), 23.96 (C<sub>cyclohexyl</sub>). <sup>77</sup>Se-NMR in DMSO-*d*<sub>6</sub> (76 MHz) δ (ppm): 339.64. Elemental analysis for C<sub>14</sub>H<sub>18</sub>N<sub>2</sub>OSe calculated/found (percent): C, 54.37/54.56; H, 5.87/5.64; N, 9.06/9.13.

**2-((Cyclohexylcarbamosenoyl)carbamoyl)phenyl acetate (9).** From *O*-acetylsalicyloyl chloride and cyclohexylamine. Appearance: brown solid. Melting point: 79-81 °C. Yield: 10%. <sup>1</sup>H-NMR in DMSO-*d*<sub>6</sub> (400 MHz) δ (ppm): 11.52 (s, 1H, NH), 11.13 (d, *J* = 8.0, 1H, NH), 7.70 (dd, *J* = 7.7, 1.7, 1H, H<sub>aryl</sub>), 7.63 (ddd, *J* = 8.2, 7.5, 1.7, 1H, H<sub>aryl</sub>), 7.38 (td, *J* = 7.6, 1.1, 1H, H<sub>aryl</sub>), 7.28 (dd, *J* = 8.1, 1.1, 1H, H<sub>aryl</sub>), 4.25 (m, 1H, H<sub>cyclohexyl</sub>), 2.32 (s, 3H, CH<sub>3</sub>), 1.99 (s, 2H, H<sub>cyclohexyl</sub>), 1.72 – 1.21 (m, 8H, H<sub>cyclohexyl</sub>). <sup>13</sup>C-NMR in DMSO-*d*<sub>6</sub> (100 MHz) δ (ppm): 178.39 (C=Se), 168.75 (C=O<sub>acetoxy</sub>), 166.33 (C=O), 148.10 (C<sub>aryl</sub>), 133.25 (C<sub>aryl</sub>), 130.10 (C<sub>aryl</sub>), 126.28 (C<sub>aryl</sub>), 125.90 (C<sub>aryl</sub>), 123.17 (C<sub>aryl</sub>), 56.18 (C<sub>cyclohexyl</sub>), 30.59 (C<sub>cyclohexyl</sub>), 24.82 (C<sub>cyclohexyl</sub>), 23.95 (C<sub>cyclohexyl</sub>), 20.82 (CH<sub>3</sub>). <sup>77</sup>Se-NMR in DMSO-*d*<sub>6</sub> (76 MHz) δ (ppm): 343.24. Elemental analysis for C<sub>16</sub>H<sub>20</sub>N<sub>2</sub>O<sub>3</sub>Se calculated/found (percent): C, 52.32/52.01; H, 5.49/5.58; N, 7.63/7.70.

***N*-(Cyclohexylcarbamosenoyl) thiophene-2-carboxamide (10).** From 2-thiophenecarbonyl chloride and cyclohexylamine. Appearance: yellow solid. Melting point: 64-66 °C. Yield: 12%. <sup>1</sup>H-NMR in DMSO-*d*<sub>6</sub> (400 MHz) δ (ppm): 11.57 (s, 1H, NH), 11.31 (d, *J* = 8.0, 1H, NH), 8.37 (dd, *J* = 4.0, 1.1, 1H, H<sub>aryl</sub>), 8.04 (dd, *J* = 5.0, 1.1, 1H, H<sub>aryl</sub>), 7.23 (dd, *J* = 5.0, 3.9, 1H, H<sub>aryl</sub>), 4.28 (tq, *J* = 9.3, 5.4, 4.7, 1H, H<sub>cyclohexyl</sub>), 2.00 – 1.94 (m, 2H, H<sub>cyclohexyl</sub>), 1.64 (dt, *J* = 8.8, 4.2, 2H, H<sub>cyclohexyl</sub>), 1.58 – 1.51 (m, 1H, H<sub>cyclohexyl</sub>), 1.47 – 1.20 (m, 5H, H<sub>cyclohexyl</sub>). <sup>13</sup>C-NMR in DMSO-*d*<sub>6</sub> (100 MHz) δ (ppm): 178.41 (C=Se), 162.25 (C=O), 136.39 (C<sub>aryl</sub>), 135.36 (C<sub>aryl</sub>), 132.83 (C<sub>aryl</sub>), 128.75 (C<sub>aryl</sub>), 56.09 (C<sub>cyclohexyl</sub>), 30.59 (C<sub>cyclohexyl</sub>), 24.87 (C<sub>cyclohexyl</sub>), 23.92 (C<sub>cyclohexyl</sub>). <sup>77</sup>Se-NMR in CDCl<sub>3</sub> (76 MHz) δ (ppm): 327.75. Elemental analysis for C<sub>12</sub>H<sub>16</sub>N<sub>2</sub>OSe calculated/found (percent): C, 45.71/45.91; H, 5.12/5.14; N, 8.88/8.73.

***N*-(Cyclohexylcarbamosenoyl)cinnamamide (11).** From cinnamoyl chloride and cyclohexylamine. Appearance: yellow solid. Melting point: 140-142 °C. Yield: 38%. <sup>1</sup>H-NMR in DMSO-*d*<sub>6</sub> (400 MHz) δ (ppm): 11.52 (s, 1H, NH), 11.45 (d, *J* = 8.1, 1H, NH), 7.72 (d, *J* = 15.7, 1H, H<sub>alkene</sub>), 7.60 (m, 2H, H<sub>aryl</sub>), 7.48 – 7.44 (m, 3H, H<sub>aryl</sub>), 7.06 (d, *J* = 15.7, 1H, H<sub>alkene</sub>), 4.23 (dt, *J* = 8.6, 4.3, 1H, H<sub>cyclohexyl</sub>), 1.96 (dt, *J* = 8.7, 4.4, 2H, H<sub>cyclohexyl</sub>), 1.67 – 1.21 (m, 8H, H<sub>cyclohexyl</sub>). <sup>13</sup>C-NMR in DMSO-*d*<sub>6</sub> (100 MHz) δ (ppm): 178.56 (C=Se), 166.41 (C=O), 144.52 (C<sub>alkene</sub>), 134.10 (C<sub>aryl</sub>), 130.77 (C<sub>aryl</sub>), 129.13 (C<sub>aryl</sub>), 128.23 (C<sub>aryl</sub>), 119.82 (C<sub>alkene</sub>), 55.67 (C<sub>cyclohexyl</sub>), 30.67 (C<sub>cyclohexyl</sub>), 24.85 (C<sub>cyclohexyl</sub>), 23.80 (C<sub>cyclohexyl</sub>). <sup>77</sup>Se-NMR in DMSO-*d*<sub>6</sub> (76 MHz) δ (ppm): 326.55. Elemental analysis for C<sub>16</sub>H<sub>20</sub>N<sub>2</sub>OSe calculated/found (percent): C, 57.31/57.28; H, 6.01/5.94; N, 8.35/8.53.

***N*-(Cyclohexylcarbamosenoyl)benzo[d][1,3]dioxole-5-carboxamide (12).** From piperonylic acid and cyclohexylamine. Appearance: brown solid. Melting point: 117-119 °C. Yield: 51%. <sup>1</sup>H-NMR in CDCl<sub>3</sub> (400 MHz) δ (ppm): 11.19 (d, 1H, NH), 9.11 (s, 1H, NH), 7.38 (dd, *J* = 8.2, 1.9, 1H, H<sub>aryl</sub>), 7.28 (d, *J* = 1.9, 1H, H<sub>aryl</sub>), 6.87 (d, *J* = 8.2, 1H, H<sub>aryl</sub>), 6.07 (s, 2H, CH<sub>2</sub>), 4.37 – 4.27 (m, 1H, H<sub>cyclohexyl</sub>), 2.14 – 2.06 (m, 2H, H<sub>cyclohexyl</sub>), 1.76 – 1.26 (m, 8H, H<sub>cyclohexyl</sub>). <sup>13</sup>C-NMR in CDCl<sub>3</sub> (100 MHz) δ (ppm): 178.39, (C=Se) 166.07 (C=O), 152.47 (C<sub>aryl</sub>), 148.74 (C<sub>aryl</sub>), 125.45 (C<sub>aryl</sub>), 123.06 (C<sub>aryl</sub>), 108.58 (C<sub>aryl</sub>), 107.83 (C<sub>aryl</sub>), 102.42 (CH<sub>2</sub>), 57.55 (C<sub>cyclohexyl</sub>), 31.58 (C<sub>cyclohexyl</sub>), 25.44 (C<sub>cyclohexyl</sub>), 24.37 (C<sub>cyclohexyl</sub>). <sup>77</sup>Se-NMR in CDCl<sub>3</sub> (76 MHz) δ (ppm): 317.31. Elemental analysis for C<sub>15</sub>H<sub>18</sub>N<sub>2</sub>O<sub>3</sub>Se calculated/found (percent): C, 51.00/50.89; H, 5.14/5.03; N, 7.93/8.06.

**(*E*)-*N*-(Cyclohexylcarbamosenoyl)-3-(thiophen-2-yl)acrylamide (13).** From 3-(2-thienyl)acrylic acid and cyclohexylamine. Appearance: brown solid. Melting point: 113-115 °C.

Yield: 33%.  $^1\text{H-NMR}$  in  $\text{CDCl}_3$  (400 MHz)  $\delta$  (ppm): 11.25 (d,  $J = 8.2$ , 1H, NH), 9.40 (s, 1H, NH), 7.86 (d,  $J = 15.2$ , 1H,  $\text{H}_{\text{alkene}}$ ), 7.44 (d,  $J = 5.3$ , 1H,  $\text{H}_{\text{aryl}}$ ), 7.32 (dd,  $J = 3.8$ , 1.1, 1H,  $\text{H}_{\text{aryl}}$ ), 7.07 (dd,  $J = 5.1$ , 3.6, 1H,  $\text{H}_{\text{aryl}}$ ), 6.37 (d,  $J = 15.2$ , 1H,  $\text{H}_{\text{alkene}}$ ), 4.33 (m, 1H,  $\text{H}_{\text{cyclohexyl}}$ ), 2.12 – 2.05 (m, 2H,  $\text{H}_{\text{cyclohexyl}}$ ), 1.75 – 1.23 (m, 8H,  $\text{H}_{\text{cyclohexyl}}$ ).  $^{13}\text{C-NMR}$  in  $\text{CDCl}_3$  (100 MHz)  $\delta$  (ppm): 178.23 (C=Se), 165.77 (C=O), 139.24 ( $\text{C}_{\text{aryl}}$ ), 138.73 ( $\text{C}_{\text{alkene}}$ ), 132.37 ( $\text{C}_{\text{aryl}}$ ), 129.97 ( $\text{C}_{\text{aryl}}$ ), 128.54 ( $\text{C}_{\text{aryl}}$ ), 116.97 ( $\text{C}_{\text{alkene}}$ ), 57.21 ( $\text{C}_{\text{cyclohexyl}}$ ), 31.59 ( $\text{C}_{\text{cyclohexyl}}$ ), 25.45 ( $\text{C}_{\text{cyclohexyl}}$ ), 24.34 ( $\text{C}_{\text{cyclohexyl}}$ ).  $^{77}\text{Se-NMR}$  in  $\text{CDCl}_3$  (76 MHz)  $\delta$  (ppm): 311.05. Elemental analysis for  $\text{C}_{14}\text{H}_{18}\text{N}_2\text{OSSe}$  calculated/found (percent): C, 49.26/49.36; H, 5.32/5.48; N, 8.21/8.15.

**(E)-3-(Benzo[d][1,3]dioxol-5-yl)-N-(cyclohexylcarbamosenoyl)acrylamide (14).** From 3,4-(methylenedioxy)cinnamic acid and cyclohexylamine. Appearance: orange solid. Melting point: 149-151  $^{\circ}\text{C}$ . Yield: 30%.  $^1\text{H-NMR}$  in  $\text{CDCl}_3$  (400 MHz)  $\delta$  (ppm): 11.28 (d,  $J = 8.3$ , 1H, NH), 9.32 (s, 1H, NH), 7.66 (d,  $J = 15.4$ , 1H,  $\text{H}_{\text{alkene}}$ ), 7.05 – 7.01 (m, 2H,  $\text{H}_{\text{aryl}}$ ), 6.83 (d,  $J = 8.5$ , 1H,  $\text{H}_{\text{aryl}}$ ), 6.37 (d,  $J = 15.4$ , 1H,  $\text{H}_{\text{alkene}}$ ), 6.03 (s, 2H,  $\text{CH}_2$ ), 4.33 (dt,  $J = 9.3$ , 4.6, 1H,  $\text{H}_{\text{cyclohexyl}}$ ), 2.11 – 2.05 (m, 2H,  $\text{H}_{\text{cyclohexyl}}$ ), 1.75 – 1.23 (m, 8H,  $\text{H}_{\text{cyclohexyl}}$ ).  $^{13}\text{C-NMR}$  in  $\text{CDCl}_3$  (100 MHz)  $\delta$  (ppm): 178.19 (C=Se), 166.26 (C=O), 150.50 ( $\text{C}_{\text{aryl}}$ ), 148.64 ( $\text{C}_{\text{aryl}}$ ), 146.18 ( $\text{C}_{\text{alkene}}$ ), 128.41 ( $\text{C}_{\text{aryl}}$ ), 125.56 ( $\text{C}_{\text{aryl}}$ ), 116.26 ( $\text{C}_{\text{alkene}}$ ), 108.80 ( $\text{C}_{\text{aryl}}$ ), 106.87 ( $\text{C}_{\text{aryl}}$ ), 101.87 ( $\text{CH}_2$ ), 57.16 ( $\text{C}_{\text{cyclohexyl}}$ ), 31.61 ( $\text{C}_{\text{cyclohexyl}}$ ), 25.46 ( $\text{C}_{\text{cyclohexyl}}$ ), 24.31 ( $\text{C}_{\text{cyclohexyl}}$ ).  $^{77}\text{Se-NMR}$  in  $\text{CDCl}_3$  (76 MHz)  $\delta$  (ppm): 302.79. Elemental analysis for  $\text{C}_{17}\text{H}_{20}\text{N}_2\text{O}_3\text{Se}$  calculated/found (percent): C, 53.83/54.02; H, 5.31/5.69; N, 7.39/7.35.

**N-(Isopropylcarbamosenoyl) benzamide (15).** From benzoyl chloride and isopropylamine. Appearance: brown solid. Melting point: 125-127  $^{\circ}\text{C}$ . Yield: 10%.  $^1\text{H-NMR}$  in  $\text{DMSO}-d_6$  (400 MHz)  $\delta$  (ppm): 11.46 (s, 1H, NH), 11.29 (d,  $J = 8.0$ , 1H, NH), 7.91 (dd,  $J = 8.4$ , 1.3, 2H,  $\text{H}_{\text{aryl}}$ ), 7.64 (m, 1H,  $\text{H}_{\text{aryl}}$ ), 7.51 (ddd,  $J = 8.1$ , 6.7, 1.2, 2H,  $\text{H}_{\text{aryl}}$ ), 4.51 (dt,  $J = 8.0$ , 6.6, 1H,  $\text{H}_{\text{isopropyl}}$ ), 1.29 (d,  $J = 6.6$ , 6H,  $\text{H}_{\text{isopropyl}}$ ).  $^{13}\text{C-NMR}$  in  $\text{DMSO}-d_6$  (100 MHz)  $\delta$  (ppm): 178.84 (C=Se), 168.27 (C=O), 133.09 ( $\text{C}_{\text{aryl}}$ ), 131.97 ( $\text{C}_{\text{aryl}}$ ), 128.62 ( $\text{C}_{\text{aryl}}$ ), 128.41 ( $\text{C}_{\text{aryl}}$ ), 49.93 ( $\text{C}_{\text{isopropyl}}$ ), 21.05 ( $\text{C}_{\text{isopropyl}}$ ).  $^{77}\text{Se-NMR}$  in  $\text{DMSO}-d_6$  (76 MHz)  $\delta$  (ppm): 342.44. Elemental analysis for  $\text{C}_{11}\text{H}_{14}\text{N}_2\text{OSe}$  calculated/found (percent): C, 49.08/48.94; H, 5.24/5.13; N, 10.41/10.56.

**2-((Isopropylcarbamosenoyl)carbamoyl)phenyl acetate (16).** From *O*-acetylsalicyloyl chloride and isopropylamine. Appearance: red solid. Melting point: 75-77  $^{\circ}\text{C}$ . Yield: 9%.  $^1\text{H-NMR}$  in  $\text{CDCl}_3$  (400 MHz)  $\delta$  (ppm): 11.00 (s, 1H, NH), 10.08 (s, 1H, NH), 8.02 (dd,  $J = 7.9$ , 1.7, 1H,  $\text{H}_{\text{aryl}}$ ), 7.61 (ddd,  $J = 8.2$ , 7.4, 1.8, 1H,  $\text{H}_{\text{aryl}}$ ), 7.39 (td,  $J = 7.6$ , 1.1, 1H,  $\text{H}_{\text{aryl}}$ ), 7.25 (dd,  $J = 8.3$ , 1.1, 1H,  $\text{H}_{\text{aryl}}$ ), 4.58 (m, 1H,  $\text{H}_{\text{isopropyl}}$ ), 2.59 (s, 3H,  $\text{CH}_3$ ), 1.37 (d,  $J = 6.5$ , 6H,  $\text{H}_{\text{isopropyl}}$ ).  $^{13}\text{C-NMR}$  in  $\text{CDCl}_3$  (100 MHz)  $\delta$  (ppm): 178.53 (C=Se), 168.39 (C=O<sub>acetoxyl</sub>), 164.06 (C=O), 148.50 ( $\text{C}_{\text{aryl}}$ ), 134.56 ( $\text{C}_{\text{aryl}}$ ), 131.61 ( $\text{C}_{\text{aryl}}$ ), 126.87 ( $\text{C}_{\text{aryl}}$ ), 124.01 ( $\text{C}_{\text{aryl}}$ ), 123.88 ( $\text{C}_{\text{aryl}}$ ), 51.24 ( $\text{C}_{\text{isopropyl}}$ ), 21.75 ( $\text{C}_{\text{isopropyl}}$ ), 21.59 ( $\text{CH}_3$ ).  $^{77}\text{Se-NMR}$  in  $\text{CDCl}_3$  (76 MHz)  $\delta$  (ppm): 341.81. Elemental analysis for  $\text{C}_{13}\text{H}_{16}\text{N}_2\text{O}_3\text{Se}$  calculated/found (percent): C, 47.71/47.83; H, 4.93/5.06; N, 8.56/8.68.

**N-(Isopropylcarbamosenoyl)thiophene-2-carboxamide (17).** From 2-thiophenecarbonyl chloride and isopropylamine. Appearance: brown solid. Melting point: 120-122  $^{\circ}\text{C}$ . Yield: 16%.  $^1\text{H-NMR}$  in  $\text{DMSO}-d_6$  (400 MHz)  $\delta$  (ppm): 11.52 (s, 1H, NH), 11.15 (d,  $J = 7.9$ , 1H, NH), 8.35 (dd,  $J = 3.9$ , 1.1, 1H,  $\text{H}_{\text{aryl}}$ ), 8.02 (dd,  $J = 5.0$ , 1.1, 1H,  $\text{H}_{\text{aryl}}$ ), 7.22 (dd,  $J = 5.0$ , 3.9, 1H,  $\text{H}_{\text{aryl}}$ ), 4.78 – 4.22 (m, 1H,  $\text{H}_{\text{isopropyl}}$ ), 1.27 (d,  $J = 6.5$ , 6H,  $\text{H}_{\text{isopropyl}}$ ).  $^{13}\text{C-NMR}$  in  $\text{DMSO}-d_6$  (100 MHz)  $\delta$  (ppm): 178.37 (C=Se), 162.03 (C=O), 136.44 ( $\text{C}_{\text{aryl}}$ ), 135.31 ( $\text{C}_{\text{aryl}}$ ), 132.75 ( $\text{C}_{\text{aryl}}$ ), 128.75 ( $\text{C}_{\text{aryl}}$ ), 49.94 (s, 1C,  $\text{C}_{\text{isopropyl}}$ ), 21.01 (s, 2C,  $\text{C}_{\text{isopropyl}}$ ).  $^{77}\text{Se-NMR}$  in  $\text{DMSO}-d_6$  (76 MHz)  $\delta$  (ppm): 343.84. Elemental analysis for  $\text{C}_9\text{H}_{12}\text{N}_2\text{OSSe}$  calculated/found (percent): C, 39.27/39.33; H, 4.39/4.56; N, 10.18/10.09.

**N-(Isopropylcarbamosenoyl)cinnamamide (18).** From cinnamoyl chloride and isopropylamine. Appearance: yellow solid. Melting point: 147-149  $^{\circ}\text{C}$ . Yield: 38%.  $^1\text{H-NMR}$  in  $\text{DMSO}-d_6$  (400 MHz)  $\delta$  (ppm): 11.49 (s, 1H, NH), 11.28 (d,  $J = 7.9$ , 1H, NH), 7.70 (d,  $J = 15.7$ , 1H,  $\text{H}_{\text{alkene}}$ ), 7.60 (dd,  $J = 6.8$ , 2.9, 2H,  $\text{H}_{\text{aryl}}$ ), 7.46 (dd,  $J = 4.8$ , 1.9, 3H,  $\text{H}_{\text{aryl}}$ ), 7.06 (d,  $J = 15.8$ , 1H,  $\text{H}_{\text{alkene}}$ ), 4.44 (dt,  $J = 8.0$ , 6.6, 1H,  $\text{H}_{\text{isopropylamine}}$ ), 1.27 (d,  $J = 6.5$ , 6H,  $\text{H}_{\text{isopropylamine}}$ ).  $^{13}\text{C-NMR}$  in  $\text{DMSO}-d_6$  (100

MHz)  $\delta$  (ppm): 178.58 (C=Se), 166.23 (C=O), 144.42 (C<sub>alkene</sub>), 134.10 (C<sub>alkene</sub>), 130.78 (C<sub>aryl</sub>), 129.15 (C<sub>aryl</sub>), 128.23 (C<sub>aryl</sub>), 119.89 (C<sub>alkene</sub>), 49.63 (C<sub>isopropyl</sub>), 21.14 (C<sub>isopropyl</sub>). <sup>77</sup>Se-NMR in DMSO-*d*<sub>6</sub> (76 MHz)  $\delta$  (ppm): 329.91. Elemental analysis for C<sub>13</sub>H<sub>16</sub>N<sub>2</sub>OSe calculated/found (percent): C, 52.88/52.73; H, 5.46/5.51; N, 9.49/9.37.

***N*-(Isopropylcarbamosenoyl)benzo[d][1,3]dioxole-5-carboxamide (19).** From piperonylic acid and isopropylamine. Appearance: brown solid. Melting point: 128-130 °C. Yield: 22%. <sup>1</sup>H-NMR in CDCl<sub>3</sub> (400 MHz)  $\delta$  (ppm): 11.08 (s, 1H, NH), 9.12 (s, 1H, NH), 7.37 (dd, *J* = 8.2, 1.9, 1H, H<sub>aryl</sub>), 7.28 (d, *J* = 1.9, 1H, H<sub>aryl</sub>), 6.87 (d, *J* = 8.2, 1H, H<sub>aryl</sub>), 6.07 (s, 2H, CH<sub>2</sub>), 4.58 (dt, *J* = 8.2, 6.6, 1H, H<sub>isopropyl</sub>), 1.35 (d, *J* = 6.6, 6H, H<sub>isopropyl</sub>). <sup>13</sup>C-NMR in CDCl<sub>3</sub> (100 MHz)  $\delta$  (ppm): 178.69 (C=Se), 166.08 (C=O), 152.48 (C<sub>aryl</sub>), 148.74 (C<sub>aryl</sub>), 125.43 (C<sub>aryl</sub>), 123.06 (C<sub>aryl</sub>), 108.58 (C<sub>aryl</sub>), 107.83 (C<sub>aryl</sub>), 102.42 (CH<sub>2</sub>), 51.26 (C<sub>isopropyl</sub>), 21.74 (C<sub>isopropyl</sub>). <sup>77</sup>Se-NMR in CDCl<sub>3</sub> (76 MHz)  $\delta$  (ppm): 322.77. Elemental analysis for C<sub>12</sub>H<sub>14</sub>N<sub>2</sub>O<sub>3</sub>Se calculated/found (percent): C, 46.02/45.90; H, 4.51/4.58; N, 8.94/9.10.

**(E)-*N*-(Isopropylcarbamosenoyl)-3-(thiophen-2-yl)acrylamide (20).** From 3-(2-thienyl)acrylic acid and isopropylamine. Appearance: yellow solid. Melting point: 148-149 °C. Yield: 15%. <sup>1</sup>H-NMR in DMSO-*d*<sub>6</sub> (400 MHz)  $\delta$  (ppm): 11.46 (s, 1H, NH), 11.25 (d, *J* = 8.0, 1H, NH), 7.85 (d, *J* = 15.5, 1H, H<sub>alkene</sub>), 7.75 (d, *J* = 5.1, 1H, H<sub>aryl</sub>), 7.51 (d, *J* = 3.51, 1H, H<sub>aryl</sub>), 7.16 (dd, *J* = 5.0, 3.6, 1H, H<sub>aryl</sub>), 6.80 (d, *J* = 15.4, 1H, H<sub>alkene</sub>), 4.43 (dt, *J* = 8.0, 6.6, 1H, H<sub>isopropyl</sub>), 1.26 (d, *J* = 6.6, 6H, H<sub>isopropyl</sub>). <sup>13</sup>C-NMR in DMSO-*d*<sub>6</sub> (100 MHz)  $\delta$  (ppm): 178.52 (C=Se), 166.08 (C=O), 139.31 (C<sub>aryl</sub>), 137.24 (C<sub>alkene</sub>), 132.93 (C<sub>alkene</sub>), 130.37 (C<sub>aryl</sub>), 128.72 (C<sub>aryl</sub>), 118.16 (C<sub>alkene</sub>), 49.60 (C<sub>isopropyl</sub>), 21.15 (C<sub>isopropyl</sub>). <sup>77</sup>Se-NMR in DMSO-*d*<sub>6</sub> (76 MHz)  $\delta$  (ppm): 329.07. Elemental analysis for C<sub>11</sub>H<sub>14</sub>N<sub>2</sub>OSse calculated/found (percent): C, 43.85/43.80; H, 4.68/4.44; N, 9.30/9.62.

**(E)-3-(Benzo[d][1,3]dioxol-5-yl)-*N*-(isopropylcarbamosenoyl)acrylamide (21).** From 3,4-(methylenedioxy)cinnamic acid and isopropylamine. Appearance: orange solid. Melting point: 172-174 °C. Yield: 10%. <sup>1</sup>H-NMR in CDCl<sub>3</sub> (400 MHz)  $\delta$  (ppm): 11.15 (d, *J* = 8.0, 1H, NH), 9.24 (s, 1H, NH), 7.66 (d, *J* = 15.4, 1H, H<sub>alkene</sub>), 7.07 – 7.00 (m, 2H, H<sub>aryl</sub>), 6.83 (d, *J* = 8.4, 1H, H<sub>aryl</sub>), 6.33 (d, *J* = 15.4, 1H, H<sub>alkene</sub>), 6.03 (s, 2H, CH<sub>2</sub>), 4.83 – 4.37 (m, 1H, H<sub>isopropyl</sub>), 1.35 (d, *J* = 6.6, 6H, H<sub>isopropyl</sub>). <sup>13</sup>C-NMR in CDCl<sub>3</sub> (100 MHz)  $\delta$  (ppm): 178.59 (C=Se), 166.04 (C=O), 150.59 (C<sub>aryl</sub>), 148.69 (C<sub>aryl</sub>), 146.34 (C<sub>alkene</sub>), 128.33 (C<sub>aryl</sub>), 125.62 (C<sub>aryl</sub>), 116.11 (C<sub>alkene</sub>), 108.86 (C<sub>aryl</sub>), 106.83 (C<sub>aryl</sub>), 101.92 (CH<sub>2</sub>), 51.03 (C<sub>isopropyl</sub>), 21.81 (C<sub>isopropyl</sub>). <sup>77</sup>Se-NMR in CDCl<sub>3</sub> (76 MHz)  $\delta$  (ppm): 312.38. Elemental analysis for C<sub>14</sub>H<sub>16</sub>N<sub>2</sub>O<sub>3</sub>Se calculated/found (percent): C, 49.56/49.67; H, 4.75/4.59; N, 8.26/8.48.

**2-Hydroxy-*N*-(isopropylcarbamosenoyl)benzamide (22).** From *O*-acetylsalicyloyl chloride and isopropylamine. Appearance: yellow solid. Melting point: 162-164 °C. Yield: 9%. <sup>1</sup>H-NMR in CDCl<sub>3</sub> (400 MHz)  $\delta$  (ppm): 11.00 (s, 1H, OH), 10.50 (s, 1H, NH), 9.95 (s, 1H, NH), 7.65 (dd, *J* = 8.1, 1.6, 1H, H<sub>aryl</sub>), 7.50 (ddd, *J* = 8.7, 7.2, 1.6, 1H, H<sub>aryl</sub>), 7.12 (dd, *J* = 8.5, 1.1, 1H, H<sub>aryl</sub>), 6.98 (ddd, *J* = 7.6, 7.0, 1.1, 1H, H<sub>aryl</sub>), 4.60 (dt, *J* = 8.2, 6.6, 1H, H<sub>isopropyl</sub>), 1.39 (d, *J* = 6.5, 6H, H<sub>isopropyl</sub>). <sup>13</sup>C-NMR in CDCl<sub>3</sub> (100 MHz)  $\delta$  (ppm): 178.17 (C=Se), 167.99 (C=O), 160.12 (C<sub>aryl</sub>), 136.35 (C<sub>aryl</sub>), 128.42 (C<sub>aryl</sub>), 120.50 (C<sub>aryl</sub>), 118.79 (C<sub>aryl</sub>), 113.95 (C<sub>aryl</sub>), 51.47 (C<sub>isopropyl</sub>), 21.79 (C<sub>isopropyl</sub>). <sup>77</sup>Se-NMR in CDCl<sub>3</sub> (76 MHz)  $\delta$  (ppm): 334.36. Elemental analysis for C<sub>11</sub>H<sub>14</sub>N<sub>2</sub>O<sub>2</sub>Se calculated/found (percent): C, 46.32/46.56; H, 4.95/4.88; N, 9.82/9.71.
